# Supplementary material for: Ionic liquid-supported sulfonyl hydrazine: a useful reagent for traceless synthesis of pyrazoles
Source: Royal Society of Chemistry journal article supplement (doi:10.1039/c4qo00092g), 2014-01-01

## Electronic Supporting Information

### Ionic liquid-supported sulfonyl hydrazine: A useful reagent for traceless synthesis of pyrazoles

Sunita Choudhary,<sup>a</sup> Manoj Kumar Muthyala,<sup>a</sup> Keykavous Parang<sup>b</sup> and Anil Kumar<sup>a,\*</sup>

<sup>a</sup>Department of Chemistry, Birla Institute of Technology and Science, Pilani, Rajasthan 333031, India.

<sup>b</sup>Chapman University School of Pharmacy, Irvine, California 92618, USA.

E-mail: anilkumar@pilani.bits-pilani.ac.in

#### Contents

1. Physical and spectroscopic data of ionic liquid-supported sulfonyl hydrazones **9** & **10** 1-7
2. Copies of <sup>1</sup>H and <sup>13</sup>C NMR of ionic liquid-supported sulfonyl hydrazones **9** & **10** 8-29
3. Copies of <sup>1</sup>H and <sup>13</sup>C NMR of pyrazoles **11** & **13** 30-54

1. Physical and spectroscopic data of ionic liquid-supported sulfonyl hydrazones **9** & **10**.

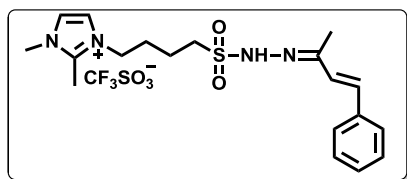

**Compound 9a:** Yield 86%; White solid; mp 150-151 °C;  $^1\text{H}$  NMR (300 MHz,  $\text{DMSO-}d_6$ )  $\delta$  10.27 (s, 1H), 7.64 (d,  $J = 2.0$  Hz, 1H), 7.61 (dd,  $J = 3.5, 1.7$  Hz, 2H), 7.58 (s, 1H), 7.39 (t,  $J = 7.2$  Hz, 2H), 7.35 – 7.30 (m, 1H), 7.10 (d,  $J = 16.6$  Hz, 1H), 6.84 (d,  $J = 16.6$  Hz, 1H), 4.16 (t,  $J = 7.1$  Hz, 2H), 3.73 (s, 3H), 3.33 – 3.24 (m, 2H), 2.59 (s, 3H), 2.08 (s, 3H), 1.90-1.81(m, 2H), 1.78 – 1.65 (m, 2H);  $^{13}\text{C}$  NMR (75 MHz,  $\text{DMSO-}d_6$ )  $\delta$  154.5, 144.8, 136.5, 134.2, 129.3, 129.0, 128.7, 127.4, 122.8, 121.3, 121.1 (q,  $J_{\text{C-F}} = 320.25$  Hz), 49.4, 47.3, 35.1, 28.1, 20.1, 12.9, 9.6; HRMS: Calcd. for  $\text{C}_{19}\text{H}_{27}\text{N}_4\text{O}_2\text{S}^+$  375.1849, found 375.1858 [ $\text{M} - \text{CF}_3\text{SO}_3^-$ ] $^+$ .

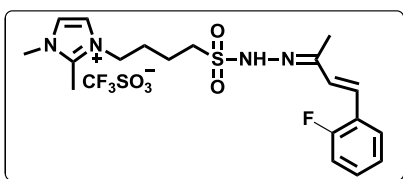

**Compound 9b:** Yield 83%; Colorless solid; mp 146-147 °C;  $^1\text{H}$  NMR (300 MHz,  $\text{DMSO-}d_6$ )  $\delta$  10.39 (s, 1H), 7.75 (t,  $J = 7.7$  Hz, 1H), 7.64 (d,  $J = 6.2$  Hz, 2H), 7.40 – 7.33 (m, 1H), 7.29 – 7.20 (m, 2H), 7.11 (d,  $J = 16.8$  Hz, 1H), 6.93 (d,  $J = 16.7$  Hz, 1H), 4.18 (t,  $J = 6.9$  Hz, 2H), 3.75 (s, 3H), 3.35 – 3.24 (m, 2H), 2.60 (s, 3H), 2.09 (s, 3H), 1.92 – 1.81 (m, 2H), 1.80 – 1.66 (m, 2H);  $^{13}\text{C}$  NMR (75 MHz,  $\text{DMSO-}d_6$ )  $\delta$  160.3 (d,  $J_{\text{C-F}} = 249.0$  Hz), 154.1, 144.8, 131.6 (d,  $J_{\text{C-F}} = 5.6$  Hz), 130.7 (d,  $J_{\text{C-F}} = 8.5$  Hz), 128.6 (d,  $J_{\text{C-F}} = 3.1$  Hz), 126.0 (d,  $J_{\text{C-F}} = 2.9$  Hz), 125.3 (d,  $J_{\text{C-F}} = 3.3$  Hz), 124.1 (d,  $J_{\text{C-F}} = 11.5$  Hz), 121.1 (q,  $J_{\text{C-F}} = 320.25$  Hz), 116.4 (d,  $J_{\text{C-F}} = 22.0$  Hz), 49.5, 47.3, 35.1, 28.1, 20.1, 12.8, 9.6; HRMS: Calcd. for  $\text{C}_{19}\text{H}_{26}\text{FN}_4\text{O}_2\text{S}^+$  393.1755, found 393.1736 [ $\text{M} - \text{CF}_3\text{SO}_3^-$ ] $^+$ .

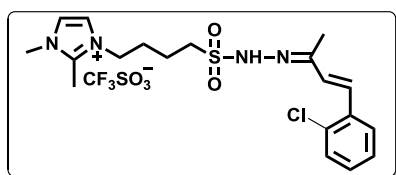

**Compound 9c:** Yield 81%; Colorless solid; mp 129-131 °C;  $^1\text{H}$  NMR (300 MHz,  $\text{DMSO-}d_6$ )  $\delta$  10.44 (s, 1H), 7.86 – 7.79 (m, 1H), 7.64 (d,  $J = 3.2$  Hz, 1H), 7.62 (d,  $J = 1.9$  Hz, 1H), 7.53 – 7.48 (m, 1H), 7.40 – 7.33 (m, 2H), 7.26 (d,  $J = 16.4$  Hz, 1H), 6.89 (d,  $J = 16.4$  Hz, 1H), 4.17 (t,  $J = 7.1$  Hz, 2H), 3.74 (s, 3H), 3.33 – 3.24 (m, 2H), 2.59 (s, 3H), 2.10 (s, 3H), 1.92 – 1.80 (m, 2H), 1.76-1.69 (m, 2H);  $^{13}\text{C}$  NMR (75 MHz,  $\text{DMSO-}d_6$ )  $\delta$  153.8, 144.8, 134.1, 132.9, 132.0, 130.5, 130.3, 129.0, 128.2, 127.7, 122.8, 121.3, 121.1 (q,  $J_{\text{C-F}} = 320.25$  Hz), 49.5, 47.3, 35.1, 28.1, 20.1, 13.0, 9.6; Calcd. for  $\text{C}_{19}\text{H}_{26}\text{ClN}_4\text{O}_2\text{S}^+$  409.1460, found 409.1443 [ $\text{M} - \text{CF}_3\text{SO}_3^-$ ] $^+$ .

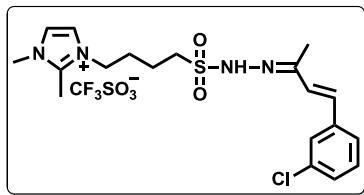

**Compound 9d:** Yield 84%; Yellow solid; mp 150-153 °C;  $^1\text{H}$  NMR (300 MHz,  $\text{DMSO-}d_6$ )  $\delta$  10.31 (s, 1H), 7.67 (s, 1H), 7.63 (d,  $J = 2.0$  Hz, 1H), 7.61 (d,  $J = 2.0$  Hz, 1H), 7.57 (d,  $J = 7.3$  Hz, 1H), 7.42 (d,  $J = 8.1$  Hz, 1H), 7.40 – 7.36 (m, 1H), 7.09 (d,  $J = 16.6$  Hz, 1H), 6.91 (d,  $J = 16.6$  Hz, 1H), 4.16 (t,  $J = 7.1$  Hz, 2H), 3.74 (s, 3H), 3.33 – 3.23 (m, 2H), 2.58 (s, 3H), 2.06 (s, 3H), 1.92 – 1.79 (m, 2H), 1.77 – 1.64 (m, 2H);  $^{13}\text{C}$  NMR (75 MHz,  $\text{DMSO-}d_6$ )  $\delta$  154.0, 144.8, 138.8, 134.1, 132.7, 131.1, 130.4, 128.6, 127.1, 125.9, 122.8, 121.3, 121.1 (q,  $J_{\text{C-F}} = 320.25$  Hz), 49.4, 47.3, 35.1, 28.1, 20.1, 12.9, 9.6; Calcd. for  $\text{C}_{19}\text{H}_{26}\text{ClN}_4\text{O}_2\text{S}^+$  409.1460, found 409.1451  $[\text{M} - \text{CF}_3\text{SO}_3^-]^+$ .

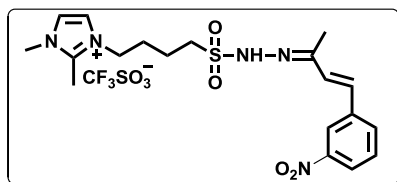

**Compound 9e:** Yield 79%; White solid; mp 153-155 °C;  $^1\text{H}$  NMR (300 MHz,  $\text{DMSO-}d_6$ )  $\delta$  10.37 (s, 1H), 8.40 (s, 1H), 8.15 (dd,  $J = 8.1, 1.7$  Hz, 1H), 8.09 (d,  $J = 7.8$  Hz, 1H), 7.69 (d,  $J = 8.0$  Hz, 1H), 7.63 (d,  $J = 1.9$  Hz, 1H), 7.61 (d,  $J = 2.0$  Hz, 1H), 7.27 (d,  $J = 16.6$  Hz, 1H), 7.03 (d,  $J = 16.6$  Hz, 1H), 4.17 (t,  $J = 7.1$  Hz, 2H), 3.74 (s, 3H), 3.35 – 3.25 (m, 2H), 2.59 (s, 3H), 2.09 (s, 3H), 1.92 – 1.80 (m, 2H), 1.78 – 1.67 (m, 2H);  $^{13}\text{C}$  NMR (75 MHz,  $\text{DMSO-}d_6$ )  $\delta$  153.7, 148.8, 144.8, 138.5, 133.2, 131.9, 131.5, 130.8, 123.3, 122.8, 122.0, 121.3, 49.5, 47.3, 35.0, 28.1, 20.1, 12.8, 9.6; Calcd. for  $\text{C}_{19}\text{H}_{26}\text{N}_5\text{O}_4\text{S}^+$  420.1700, found 420.1715  $[\text{M} - \text{CF}_3\text{SO}_3^-]^+$ .

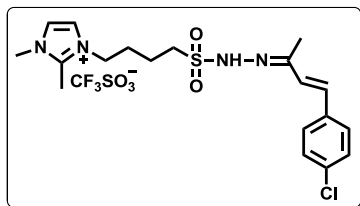

**Compound 9f:** Yield 74%; Pale yellow solid; mp 155-157 °C;  $^1\text{H}$  NMR (300 MHz,  $\text{DMSO-}d_6$ )  $\delta$  10.31 (s, 1H), 7.68 – 7.58 (m, 4H), 7.43 (d,  $J = 8.4$  Hz, 2H), 7.10 (d,  $J = 16.6$  Hz, 1H), 6.86 (d,  $J = 16.6$  Hz, 1H), 4.17 (t,  $J = 7.0$  Hz, 2H), 3.74 (s, 3H), 3.33 – 3.23 (m, 2H), 2.59 (s, 3H), 2.07 (s, 3H), 1.91-1.81 (m, 2H), 1.76-1.70 (m, 2H);  $^{13}\text{C}$  NMR (75 MHz,  $\text{DMSO-}d_6$ )  $\delta$  154.2, 144.8, 135.5, 133.3, 132.9, 129.6, 129.3, 129.1, 122.8, 121.3, 121.1 (q,  $J_{\text{C-F}} = 320.25$  Hz), 49.4, 47.3, 35.1, 28.1, 20.1, 12.9, 9.6; Calcd. for  $\text{C}_{19}\text{H}_{26}\text{ClN}_4\text{O}_2\text{S}^+$  409.1460, found 409.1452  $[\text{M} - \text{CF}_3\text{SO}_3^-]^+$ .

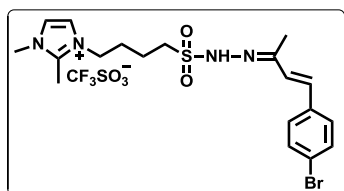

**Compound 9g:** Yield 87%; Pale yellow solid; mp 141-142 °C;  $^1\text{H}$  NMR (300 MHz,  $\text{DMSO-}d_6$ )  $\delta$  10.32 (s, 1H), 7.64 (d,  $J = 1.7$  Hz, 2H), 7.62 (d,  $J = 1.9$  Hz, 1H), 7.60 – 7.52 (m, 3H), 7.08 (d,  $J = 16.6$



$J_{C-F} = 320.25$  Hz), 49.3, 47.3, 35.1, 28.1, 21.3, 20.1, 12.9, 9.6; Calcd. for  $C_{19}H_{29}N_4O_2S^+$  389.2006, found 389.1987  $[M - CF_3SO_3]^-$ .

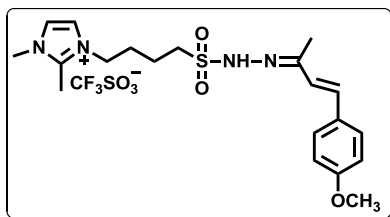

**Compound 9k:** Yield 92%; Yellow solid; mp 128-130 °C;  $^1H$  NMR (300 MHz, DMSO- $d_6$ )  $\delta$  10.17 (s, 1H), 7.64 (d,  $J = 2.0$  Hz, 1H), 7.62 (d,  $J = 2.0$  Hz, 1H), 7.53 (d,  $J = 8.8$  Hz, 2H), 7.04 (d,  $J = 16.8$  Hz, 1H), 6.96 (t,  $J = 7.0$  Hz, 2H), 6.71 (d,  $J = 16.5$  Hz, 1H), 4.16 (t,  $J = 7.1$  Hz, 2H), 3.78 (s, 3H), 3.74 (s, 3H),

3.31 – 3.23 (m, 2H), 2.59 (s, 3H), 2.05 (s, 3H), 1.92 – 1.78 (m, 2H), 1.77 – 1.64 (m, 2H);  $^{13}C$  NMR (75 MHz, DMSO- $d_6$ )  $\delta$  160.1, 154.9, 144.8, 134.0, 129.1, 128.9, 126.5, 122.8, 121.3, 121.1 (q,  $J_{C-F} = 320.25$  Hz), 114.7, 55.7, 49.3, 47.3, 35.1, 28.1, 20.1, 12.9, 9.6; Calcd. for  $C_{19}H_{29}N_4O_3S^+$  405.1955, found 405.1969  $[M - CF_3SO_3]^-$ .

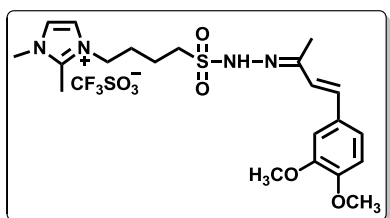

**Compound 9l:** Yield 71%; Yellow solid; mp 106-108 °C;  $^1H$  NMR (300 MHz, DMSO- $d_6$ )  $\delta$  10.19 (s, 1H), 7.65 (d,  $J = 2.0$  Hz, 1H), 7.62 (d,  $J = 2.0$  Hz, 1H), 7.21 (d,  $J = 1.6$  Hz, 1H), 7.13 – 7.04 (m, 1H), 6.97 (dd,  $J = 11.0, 5.7$  Hz, 2H), 6.76 (d,  $J = 16.5$  Hz, 1H), 4.17 (t,  $J = 7.1$  Hz, 2H), 3.81 (s, 3H), 3.77 (s, 3H), 3.74

(s, 3H), 3.31 – 3.23 (m, 2H), 2.59 (s, 3H), 2.06 (s, 3H), 1.91-1.81 (m, 2H), 1.74-1.69 (m, 2H);  $^{13}C$  NMR (75 MHz, DMSO- $d_6$ )  $\delta$  155.0, 149.9, 149.4, 144.8, 134.4, 129.4, 126.6, 122.8, 121.3, 121.3, 121.1 (q,  $J_{C-F} = 320.25$  Hz), 112.1, 109.8, 55.96, 55.95, 49.3, 47.3, 35.1, 28.1, 20.1, 12.9, 9.6; Calcd. for  $C_{19}H_{31}N_4O_4S^+$  435.2061, found 435.2096  $[M - CF_3SO_3]^-$ .

**Compound 9m:** Yield 80%; White solid; mp 138-140 °C;  $^1H$  NMR (300 MHz, DMSO- $d_6$ )  $\delta$

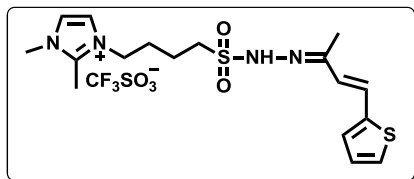

10.26 (s, 1H), 7.64 (d,  $J = 1.8$  Hz, 1H), 7.61 (d,  $J = 2.1$  Hz, 1H), 7.54 (d,  $J = 5.1$  Hz, 1H), 7.29 (dd,  $J = 9.8, 6.4$  Hz, 2H), 7.09 (dd,  $J = 5.1, 3.6$  Hz, 1H), 6.54 (d,  $J = 16.3$  Hz, 1H), 4.16 (t,  $J = 7.1$  Hz, 2H), 3.74 (s, 3H), 3.32 – 3.23 (m, 2H), 2.59 (s,

3H), 2.03 (s, 3H), 1.88-1.81 (m, 2H), 1.75-1.69 (m, 2H);  $^{13}C$  NMR (75 MHz, DMSO- $d_6$ )  $\delta$  157.2, 154.0, 144.8, 141.6, 128.8, 127.9, 127.5, 127.2, 122.8, 121.3, 121.1 (q,  $J_{C-F} = 320.25$  Hz), 49.3, 47.9, 35.1, 28.1, 20.1, 12.8, 9.6; Calcd. for  $C_{17}H_{25}N_4O_2S_2^+$  381.1413, found 381.1437  $[M - CF_3SO_3]^-$ .

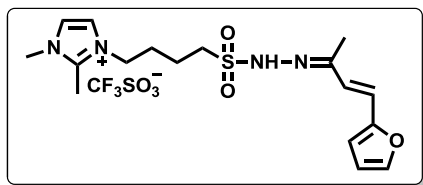

**Compound 9n:** Yield 88%; Brown solid; mp 145-146 °C;  $^1\text{H}$  NMR (300 MHz,  $\text{DMSO-}d_6$ )  $\delta$  10.30 (s, 1H), 7.73 (d,  $J = 0.9$  Hz, 1H), 7.65 (d,  $J = 1.8$  Hz, 1H), 7.63 (d,  $J = 1.9$  Hz, 1H), 6.95 (d,  $J = 16.4$  Hz, 1H), 6.67 (d,  $J = 3.3$  Hz, 1H), 6.63 (s, 1H), 6.57 (d,  $J = 3.8$  Hz, 1H), 4.17 (t,  $J = 6.9$  Hz, 2H), 3.75 (s, 3H), 3.32 – 3.24 (m, 2H), 2.60 (s, 3H), 2.03 (s, 3H), 1.91-1.81 (m, 2H), 1.76-1.68 (m, 2H);  $^{13}\text{C}$  NMR (75 MHz,  $\text{DMSO-}d_6$ )  $\delta$  154.1, 152.3, 144.8, 144.4, 126.6, 122.8, 122.0, 121.3, 121.1 (q,  $J_{\text{C-F}} = 320.25$  Hz), 112.8, 111.6, 49.4, 47.3, 35.1, 28.1, 20.0, 12.7, 9.6; Calcd. for  $\text{C}_{17}\text{H}_{25}\text{N}_4\text{O}_3\text{S}^+$  365.1642, found 365.1671 [ $\text{M} - \text{CF}_3\text{SO}_3^-$ ] $^+$ .

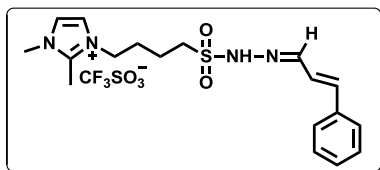

**Compound 9o:** Yield 59%; Light Brown solid; mp 129-131 °C;  $^1\text{H}$  NMR (300 MHz,  $\text{DMSO-}d_6$ )  $\delta$  11.35 (s, 1H), 7.87 (d,  $J = 8.7$  Hz, 1H), 7.66 (d,  $J = 2.1$  Hz, 1H), 7.63 (d,  $J = 2.1$  Hz, 1H), 7.61 (d,  $J = 1.4$  Hz, 1H), 7.58 (s, 1H), 7.43 – 7.31 (m, 3H), 7.02 (d,  $J = 16.1$  Hz, 1H), 6.91 (dd,  $J = 16.1, 8.7$  Hz, 1H), 4.16 (t,  $J = 7.1$  Hz, 2H), 3.74 (s, 3H), 3.29 – 3.19 (m, 2H), 2.59 (s, 3H), 1.90-1.81 (m, 2H), 1.75-1.66 (m, 2H);  $^{13}\text{C}$  NMR (75 MHz,  $\text{DMSO-}d_6$ )  $\delta$  149.1, 144.8, 139.2, 136.2, 129.3, 127.5, 125.3, 123.3, 122.8, 121.3, 121.1 (q,  $J_{\text{C-F}} = 320.25$  Hz), 49.9, 47.3, 35.1, 28.0, 20.1, 9.6; Calcd. for  $\text{C}_{18}\text{H}_{25}\text{N}_4\text{O}_2\text{S}^+$  361.1693, found 361.1706 [ $\text{M} - \text{CF}_3\text{SO}_3^-$ ] $^+$ .

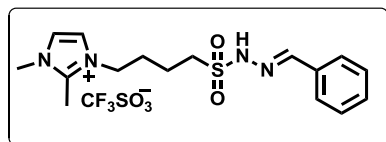

**Compound 10a:** Yield 88%; Pale yellow solid; mp 135-137 °C;  $^1\text{H}$  NMR (300 MHz,  $\text{DMSO-}d_6$ )  $\delta$  11.39 (s, 1H), 8.06 (s, 1H), 7.66 (d,  $J = 4.1$  Hz, 1H), 7.65 – 7.61 (m, 2H), 7.59 (d,  $J = 2.0$  Hz, 1H), 7.45 (d,  $J = 1.2$  Hz, 1H), 7.43 (d,  $J = 2.2$  Hz, 2H), 4.16 (t,  $J = 7.1$  Hz, 2H), 3.73 (s, 3H), 3.35 – 3.25 (m, 2H), 2.57 (s, 3H), 1.91 - 1.81 (m, 2H), 1.79 – 1.66 (m, 2H);  $^{13}\text{C}$  NMR (75 MHz,  $\text{DMSO-}d_6$ )  $\delta$  146.90, 144.8, 134.3, 130.5, 129.3, 127.3, 122.8, 121.3, 121.1 (q,  $J_{\text{C-F}} = 320.25$  Hz), 50.0, 47.3, 35.1, 28.0, 20.1, 9.6; Calcd for  $\text{C}_{16}\text{H}_{23}\text{N}_4\text{O}_2\text{S}^+$  335.1536, found 335.1523 [ $\text{M} - \text{CF}_3\text{SO}_3^-$ ] $^+$ .

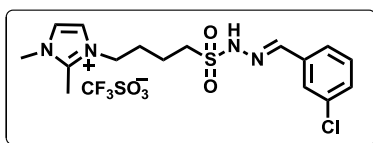

**Compound 10b:** Yield 76%; Pale yellow solid; mp 136-137 °C;  $^1\text{H}$  NMR (300 MHz,  $\text{DMSO-}d$ )  $\delta$  11.63 (s, 1H), 8.07 (s, 1H), 7.73 (s, 1H), 7.64 (d,  $J = 2.1$  Hz, 1H), 7.60 (d,  $J = 1.9$  Hz, 1H),

7.48 (dd,  $J = 3.7, 1.9$  Hz, 1H), 4.17 (t,  $J = 7.1$  Hz, 1H), 3.74 (s, 1H), 3.38 – 3.28 (m, 1H), 2.59 (s, 1H), 1.93 – 1.80 (m, 2H), 1.78-1.70 (m, 2H);  $^{13}\text{C}$  NMR (75 MHz, DMSO- $d_6$ )  $\delta$  145.1, 144.8, 136.5, 134.1, 131.2, 130.1, 126.4, 126.2, 122.8, 121.3, 121.1 (q,  $J_{\text{C-F}} = 320.25$  Hz), 50.1, 47.3, 35.1, 28.0, 20.1, 9.6; Calcd for  $\text{C}_{16}\text{H}_{22}\text{ClN}_4\text{O}_2\text{S}^+$  369.1147, found 369.1171  $[\text{M} - \text{CF}_3\text{SO}_3]^\dagger$ .

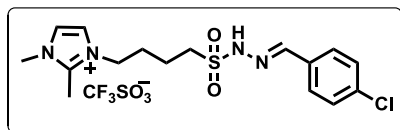

**Compound 10c:** Yield 72%; White solid; mp 154-155 °C;  $^1\text{H}$  NMR (300 MHz, DMSO- $d_6$ )  $\delta$  11.52 (s, 1H), 8.06 (s, 1H), 7.69 (d,  $J = 1.7$  Hz, 1H), 7.66 (d,  $J = 3.5$  Hz, 1H), 7.64 (d,  $J = 2.1$

Hz, 1H), 7.60 (d,  $J = 2.0$  Hz, 1H), 7.52 (s, 1H), 7.49 (d,  $J = 1.6$  Hz, 1H), 4.16 (t,  $J = 7.1$  Hz, 2H), 3.74 (s, 3H), 3.36 – 3.25 (m, 2H), 2.58 (s, 3H), 1.90 – 1.79 (m, 2H), 1.78 – 1.66 (m, 2H);  $^{13}\text{C}$  NMR (75 MHz, DMSO- $d_6$ )  $\delta$  145.5, 144.8, 134.9, 133.3, 129.3, 128.9, 122.8, 121.3, 121.1 (q,  $J_{\text{C-F}} = 320.25$  Hz), 50.1, 47.3, 35.1, 28.0, 20.1, 9.6; Calcd for  $\text{C}_{16}\text{H}_{22}\text{ClN}_4\text{O}_2\text{S}^+$  369.1147, found 369.1165  $[\text{M} - \text{CF}_3\text{SO}_3]^\dagger$ .

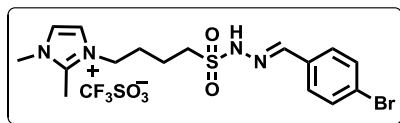

**Compound 10d:** Yield 79%; White solid; mp 132-133 °C;  $^1\text{H}$  NMR (300 MHz, DMSO- $d_6$ )  $\delta$  11.55 (s, 1H), 8.05 (s, 1H), 7.66 (d,  $J = 2.3$  Hz, 1H), 7.64 (d,  $J = 2.3$  Hz, 2H), 7.62 – 7.58 (m,

3H), 4.16 (t,  $J = 7.1$  Hz, 2H), 3.74 (s, 3H), 3.34 – 3.26 (m, 2H), 2.58 (s, 3H), 1.90 – 1.79 (m, 2H), 1.78 – 1.66 (m, 2H);  $^{13}\text{C}$  NMR (75 MHz, DMSO- $d_6$ )  $\delta$  145.6, 144.8, 133.6, 132.2, 129.2, 123.7, 122.8, 121.3, 121.1 (q,  $J_{\text{C-F}} = 320.25$  Hz), 50.1, 47.3, 35.1, 28.0, 20.1, 9.6; Calcd for  $\text{C}_{16}\text{H}_{22}\text{BrN}_4\text{O}_2\text{S}^+$  413.0641, found 413.0659  $[\text{M} - \text{CF}_3\text{SO}_3]^\dagger$  and 415.0643  $[\text{M} + 2 - \text{CF}_3\text{SO}_3]^\dagger$ .

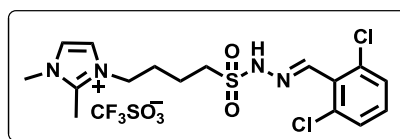

**Compound 10e:** Yield 77%; White solid; mp 152-154 °C;  $^1\text{H}$  NMR (300 MHz, DMSO- $d_6$ )  $\delta$  11.75 (s, 1H), 8.16 (s, 1H), 7.63 (d,  $J = 2.0$  Hz, 1H), 7.61 (d,  $J = 2.0$  Hz, 1H), 7.58 (d,  $J =$

1.2 Hz, 1H), 7.55 (s, 1H), 7.45 (dd,  $J = 9.0, 7.0$  Hz, 1H), 4.16 (t,  $J = 7.1$  Hz, 2H), 3.75 (s, 3H), 3.36 – 3.27 (m, 2H), 2.59 (s, 3H), 1.91-1.82 (m, 2H), 1.80 – 1.67 (m, 2H);  $^{13}\text{C}$  NMR (75 MHz, DMSO- $d_6$ )  $\delta$  144.8, 141.6, 134.3, 131.8, 130.4, 129.6, 122.8, 121.3, 121.1 (q,  $J_{\text{C-F}} = 320.25$  Hz), 50.4, 47.3, 35.1, 28.0, 20.2, 9.6; Calcd for  $\text{C}_{16}\text{H}_{21}\text{Cl}_2\text{N}_4\text{O}_2\text{S}^+$  403.0757, found 403.0728  $[\text{M} - \text{CF}_3\text{SO}_3]^\dagger$ .

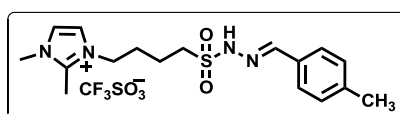

**Compound 10f:** Yield 89%; White solid; mp 131-132 °C;  $^1\text{H}$  NMR (300 MHz, DMSO- $d_6$ )  $\delta$  8.02 (s, 1H), 7.63 (d,  $J = 2.1$

Hz, 1H), 7.59 (d,  $J = 2.0$  Hz, 1H), 7.54 (d,  $J = 8.1$  Hz, 2H), 7.25 (d,  $J = 8.0$  Hz, 2H), 4.16 (t,  $J = 7.1$  Hz, 2H), 3.73 (s, 3H), 3.34 – 3.24 (m, 2H), 2.58 (s, 3H), 2.33 (s, 3H), 1.89 – 1.79 (m, 2H), 1.78 – 1.65 (m, 2H);  $^{13}\text{C}$  NMR (75 MHz, DMSO- $d_6$ )  $\delta$  147.1, 144.8, 140.3, 131.6, 129.8, 127.3, 122.8, 121.3, 121.1 (q,  $J_{\text{C-F}} = 320.25$  Hz), 49.9, 47.3, 35.1, 28.0, 21.4, 20.1, 9.6; Calcd for  $\text{C}_{17}\text{H}_{25}\text{N}_4\text{O}_2\text{S}^+$  349.1693, found 349.1682  $[\text{M} - \text{CF}_3\text{SO}_3]^+$ .

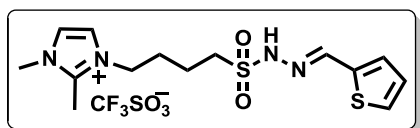

**Compound 10g:** Yield 88%; Pale yellow solid; mp 126-127

$^{\circ}\text{C}$ ;  $^1\text{H}$  NMR (300 MHz, DMSO- $d_6$ )  $\delta$  11.37 (s, 1H), 8.25 (s, 1H), 7.66 – 7.62 (m, 2H), 7.60 (d,  $J = 2.1$  Hz, 1H), 7.42 (dd,  $J = 3.6, 0.9$  Hz, 1H), 7.12 (dd,  $J = 5.0, 3.6$  Hz, 1H), 4.16 (t,  $J = 7.1$  Hz, 2H), 3.74 (s, 3H), 3.28 – 3.17 (m, 2H), 2.58 (s, 3H), 1.89 – 1.79 (m, 2H), 1.76 -1.67 (m, 2H);  $^{13}\text{C}$  NMR (75 MHz, DMSO- $d_6$ )  $\delta$  144.8, 142.2, 138.8, 131.1, 129.1, 128.3, 122.8, 121.3, 121.1 (q,  $J_{\text{C-F}} = 320.25$  Hz), 50.1, 47.3, 35.1, 28.0, 20.1, 9.6; Calcd for  $\text{C}_{14}\text{H}_{21}\text{N}_4\text{O}_2\text{S}_2^+$  341.1100, found 341.1092  $[\text{M} - \text{CF}_3\text{SO}_3]^+$ .



2. Copies of  $^1\text{H}$  and  $^{13}\text{C}$  NMR of ionic liquid-supported sulfonyl hydrazones **9** & **10**.

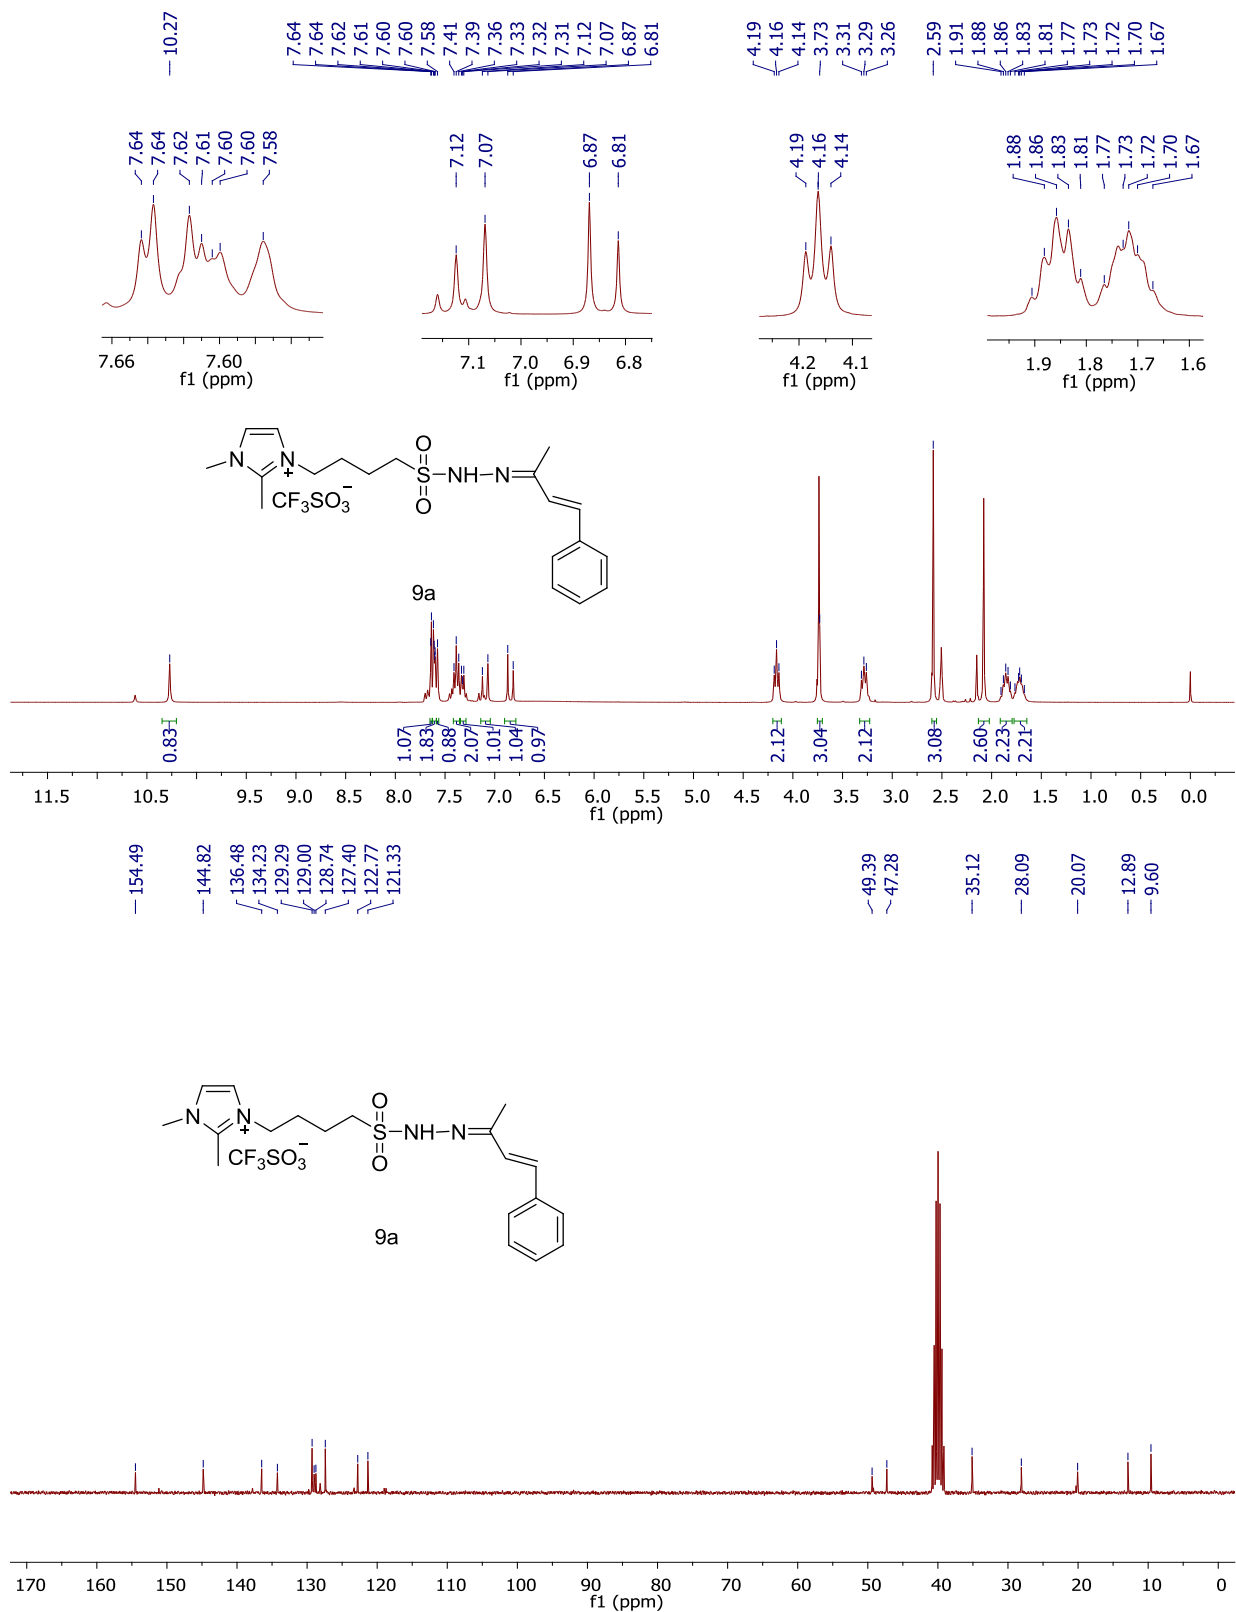

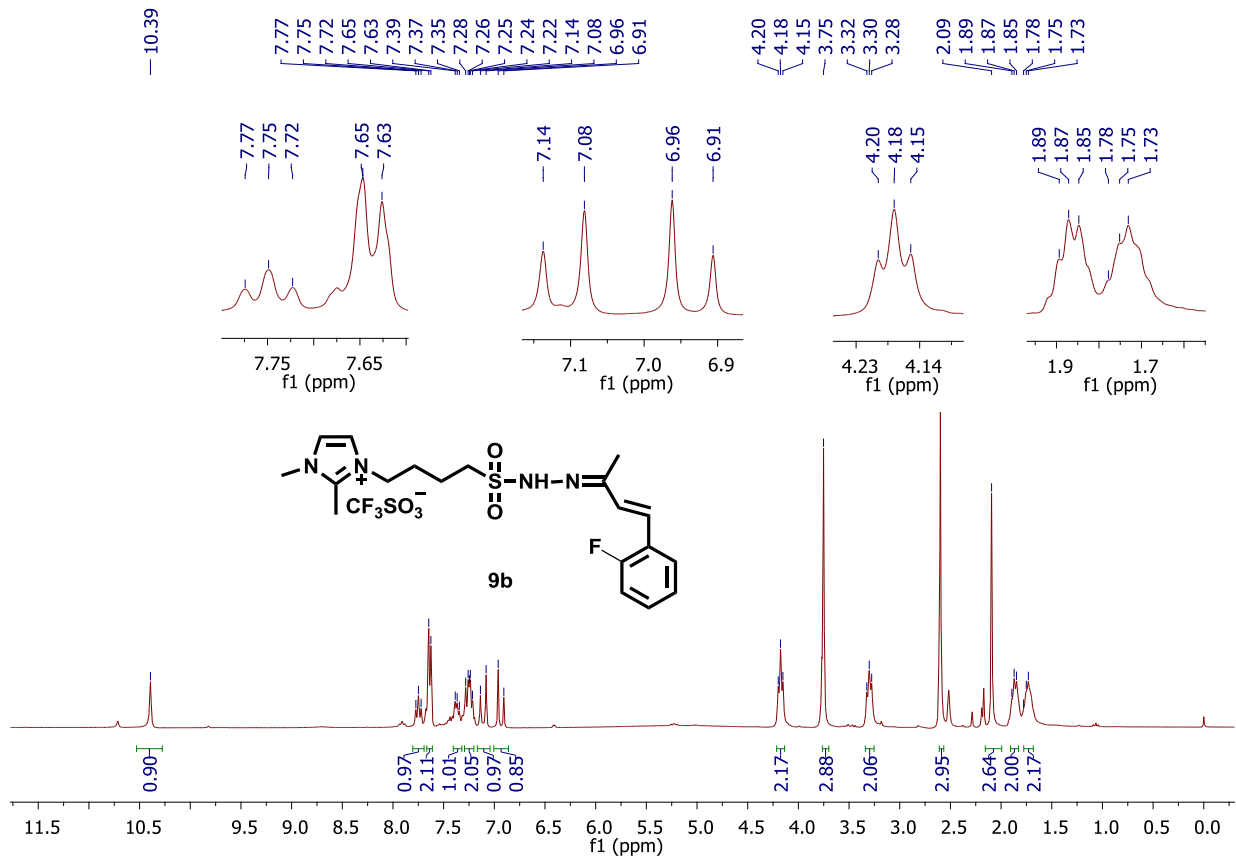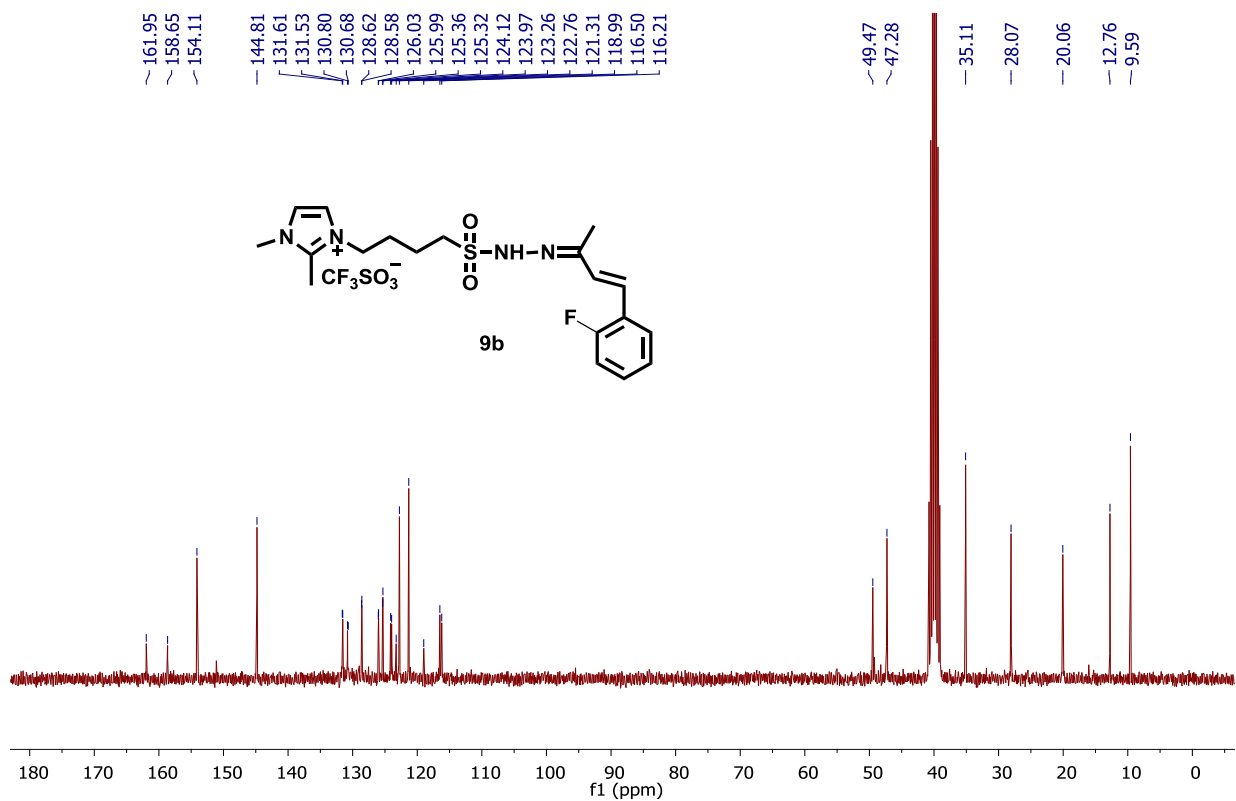

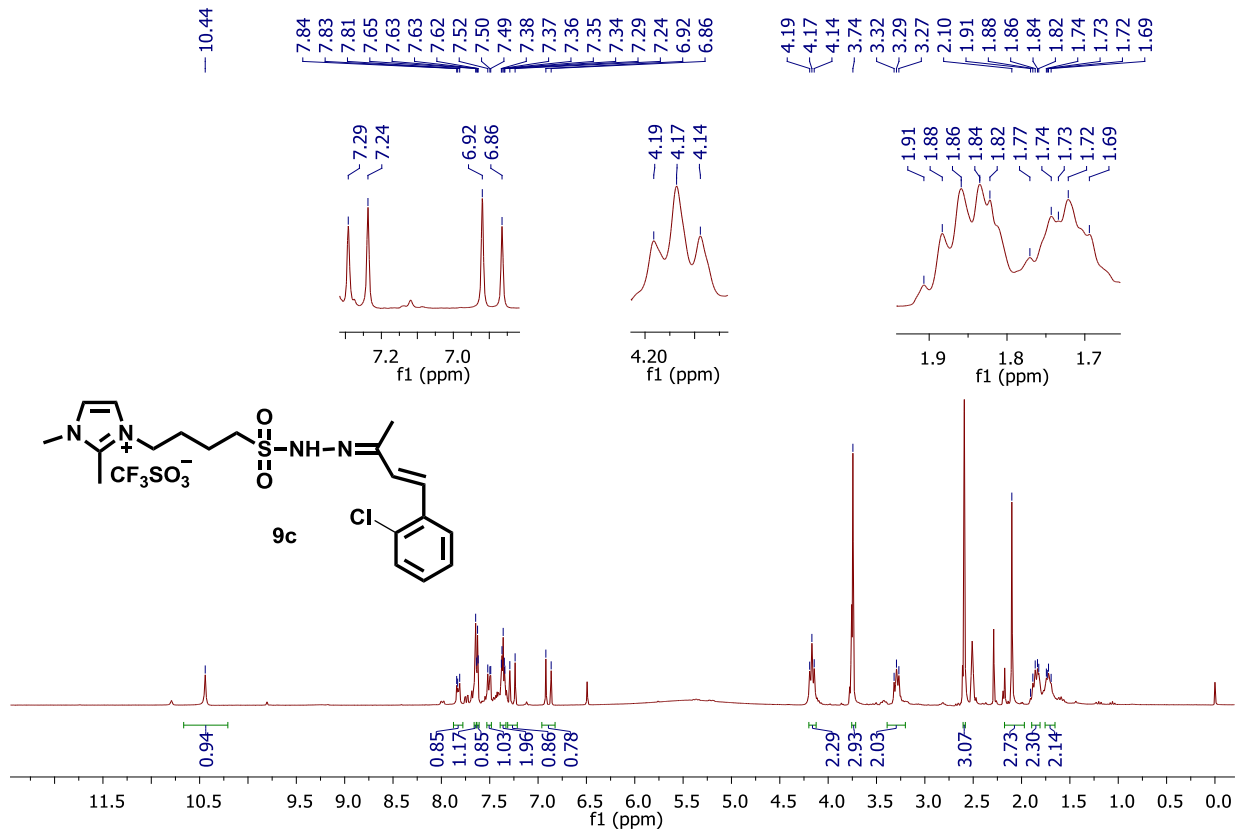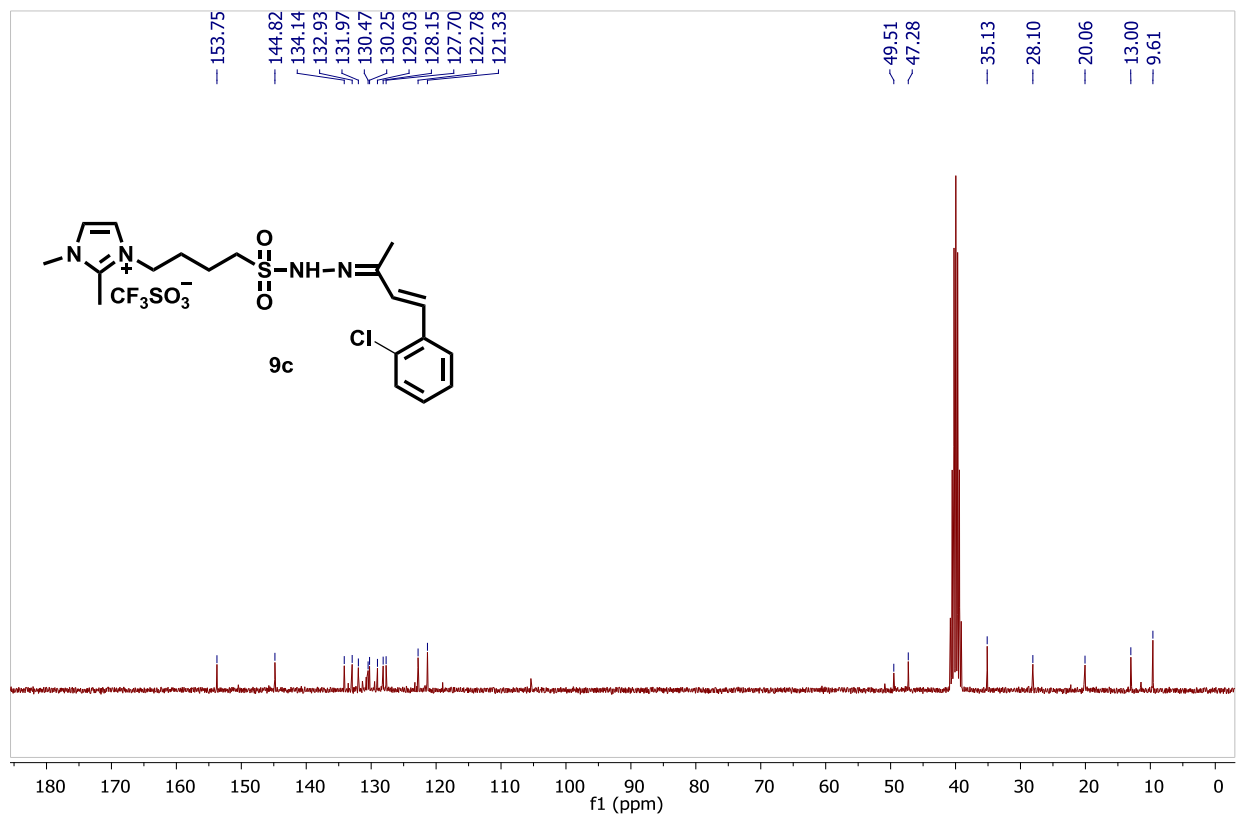

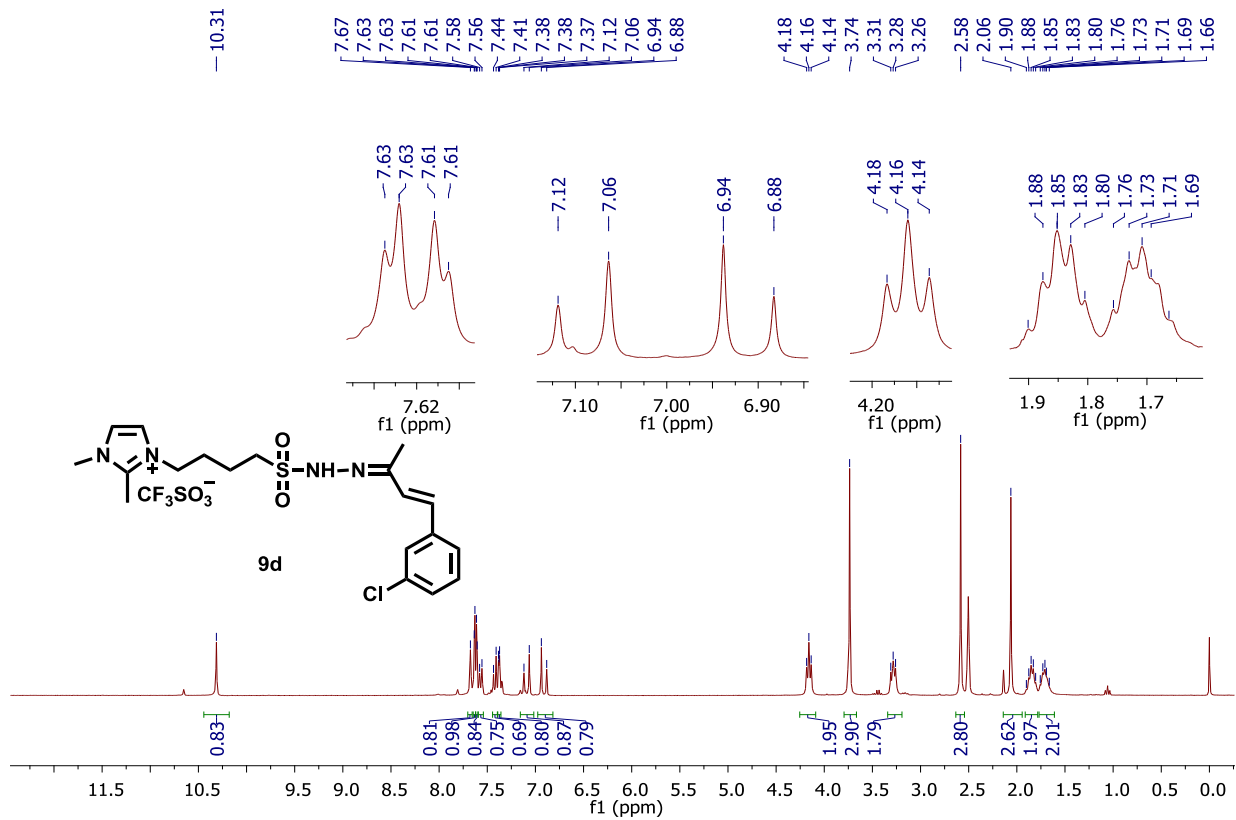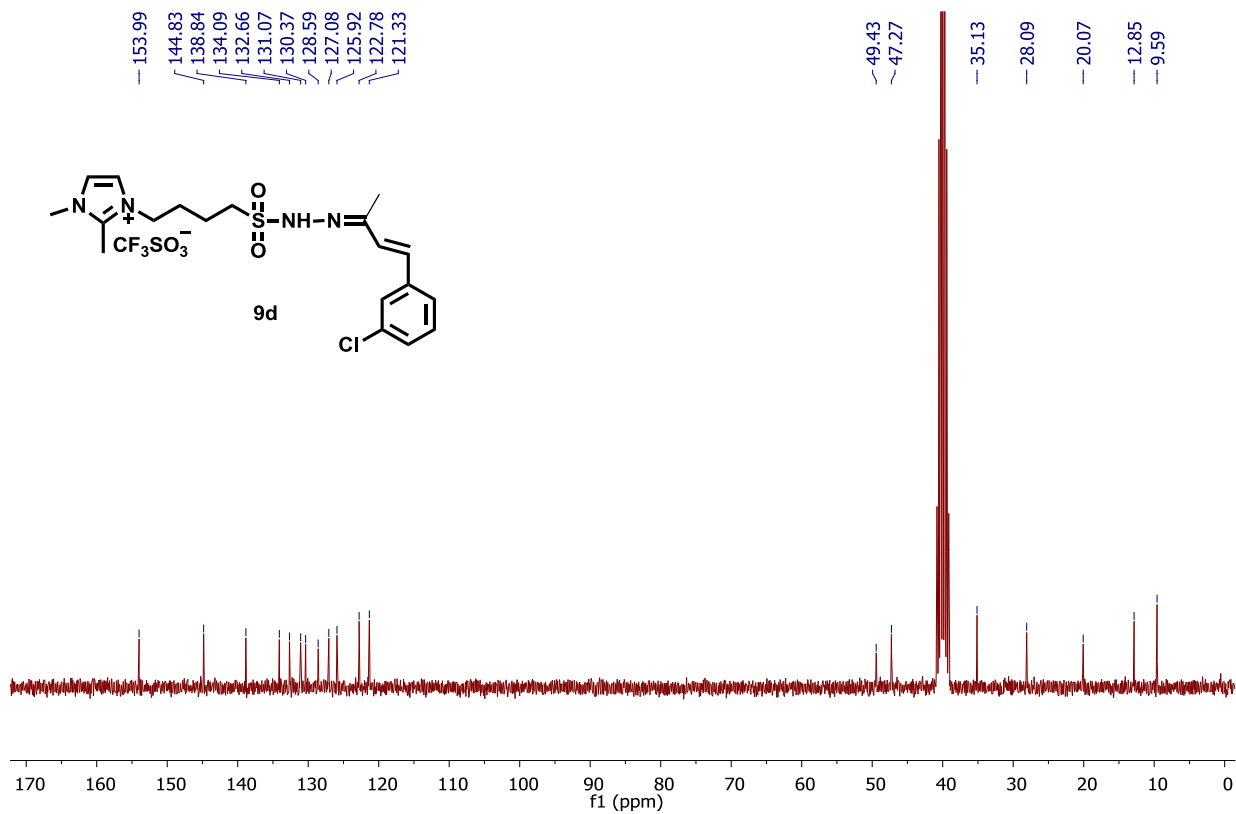

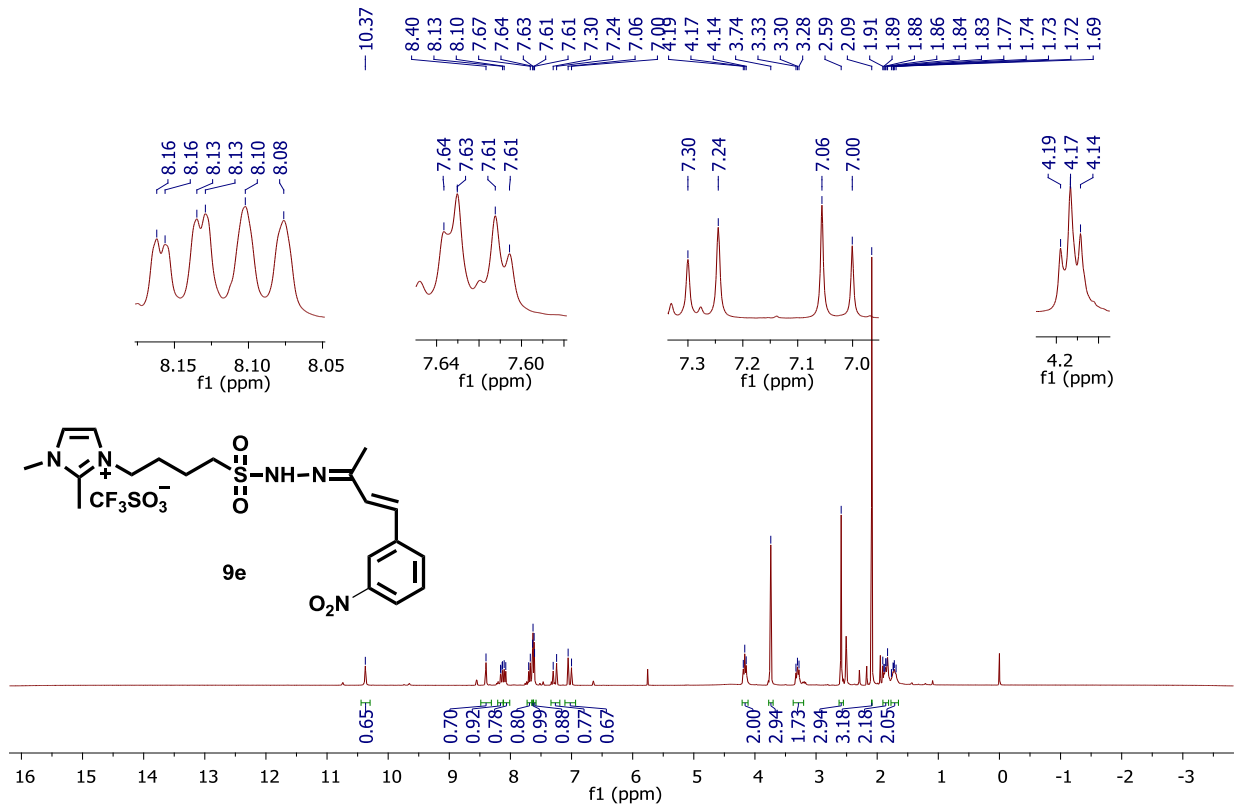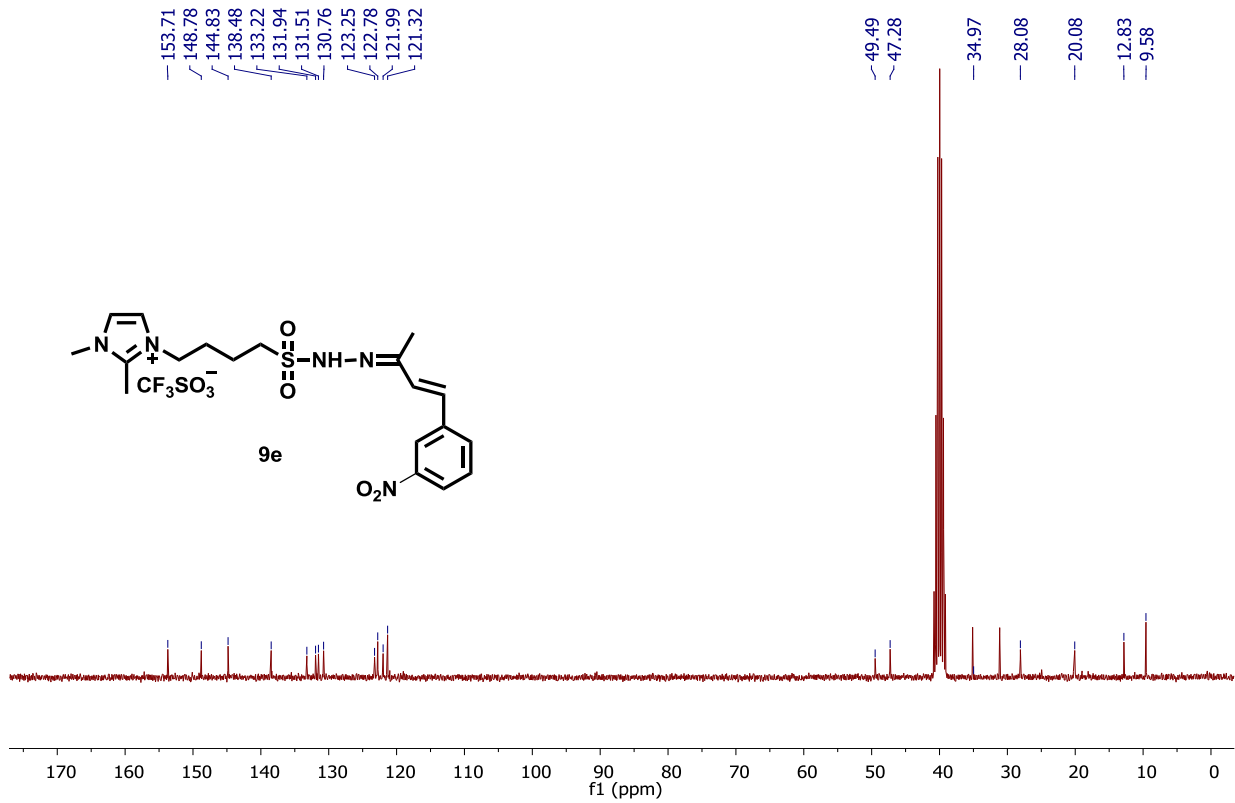

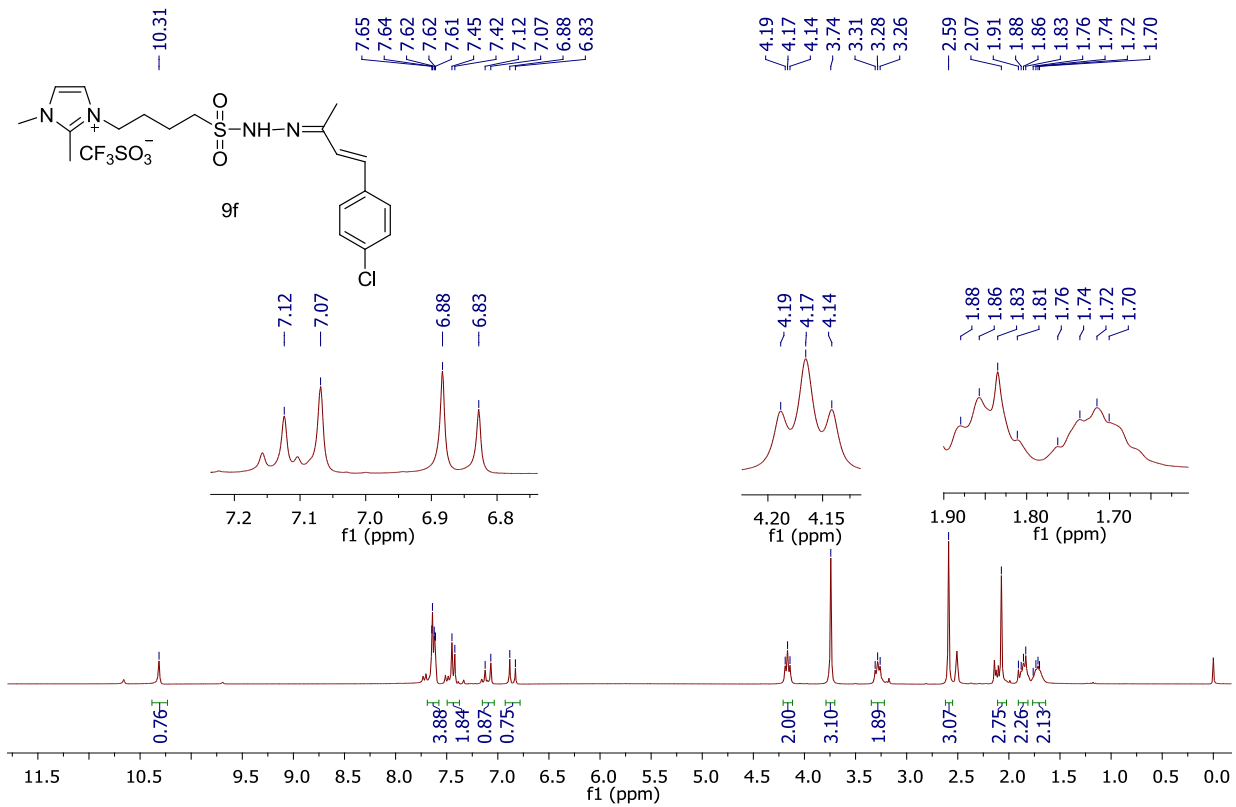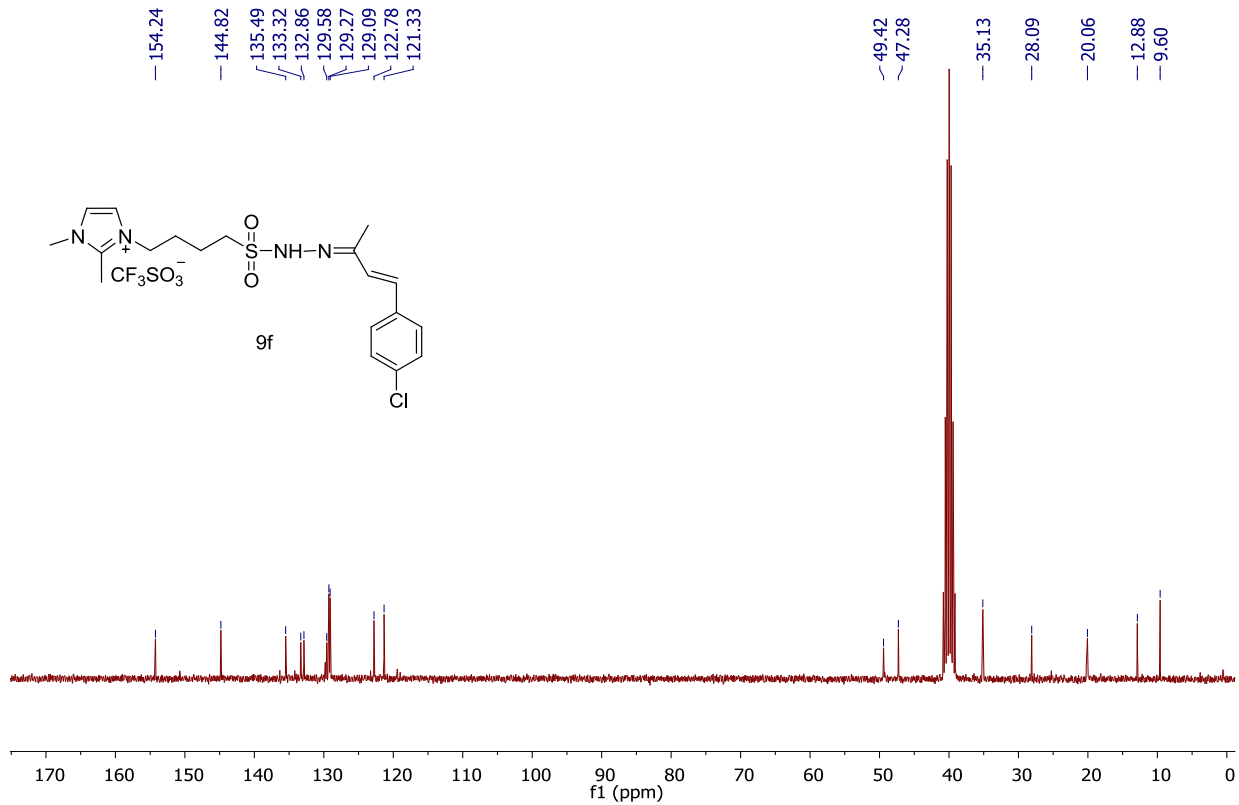

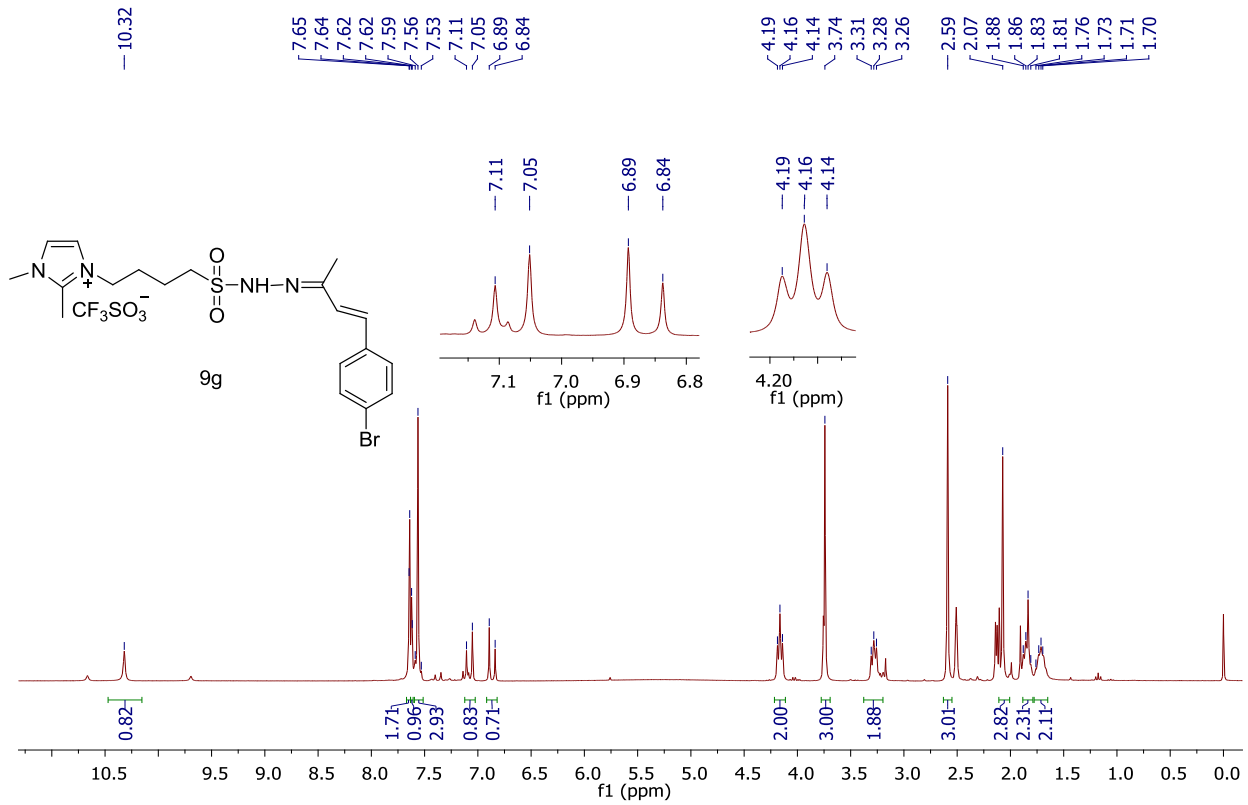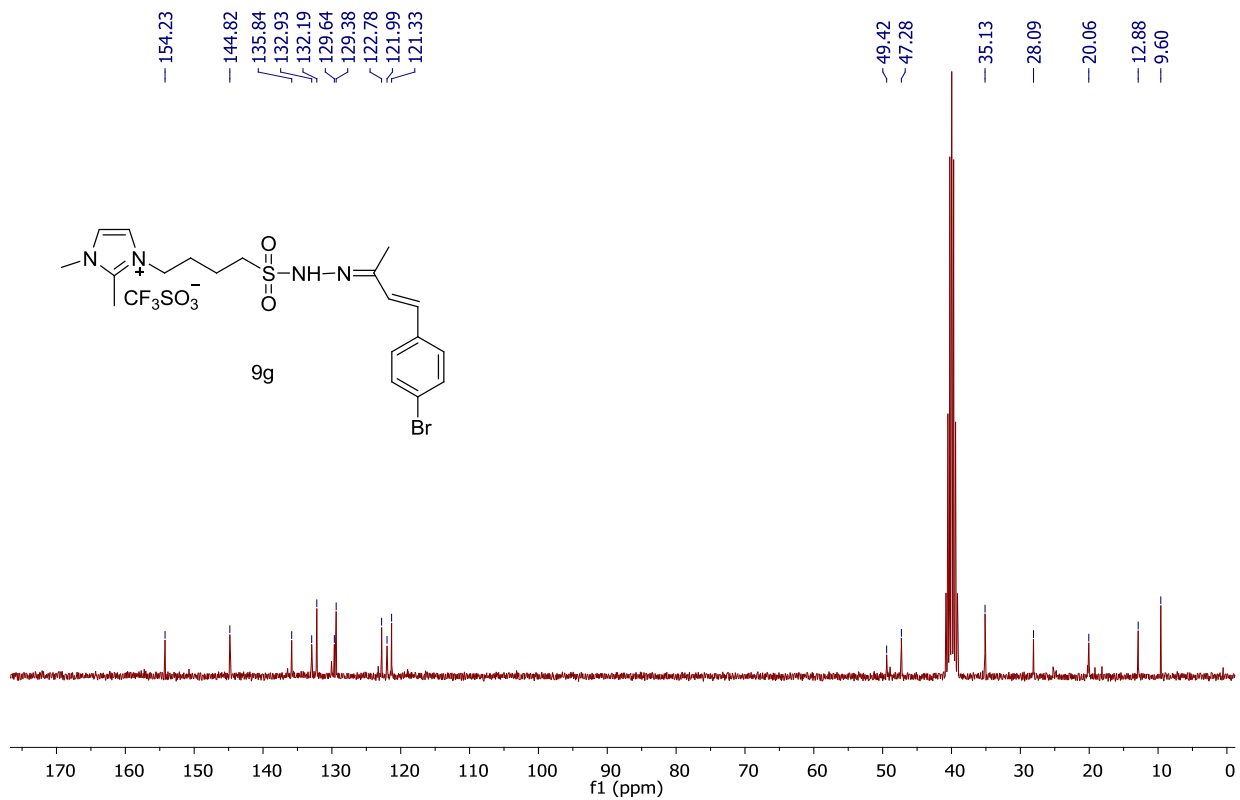

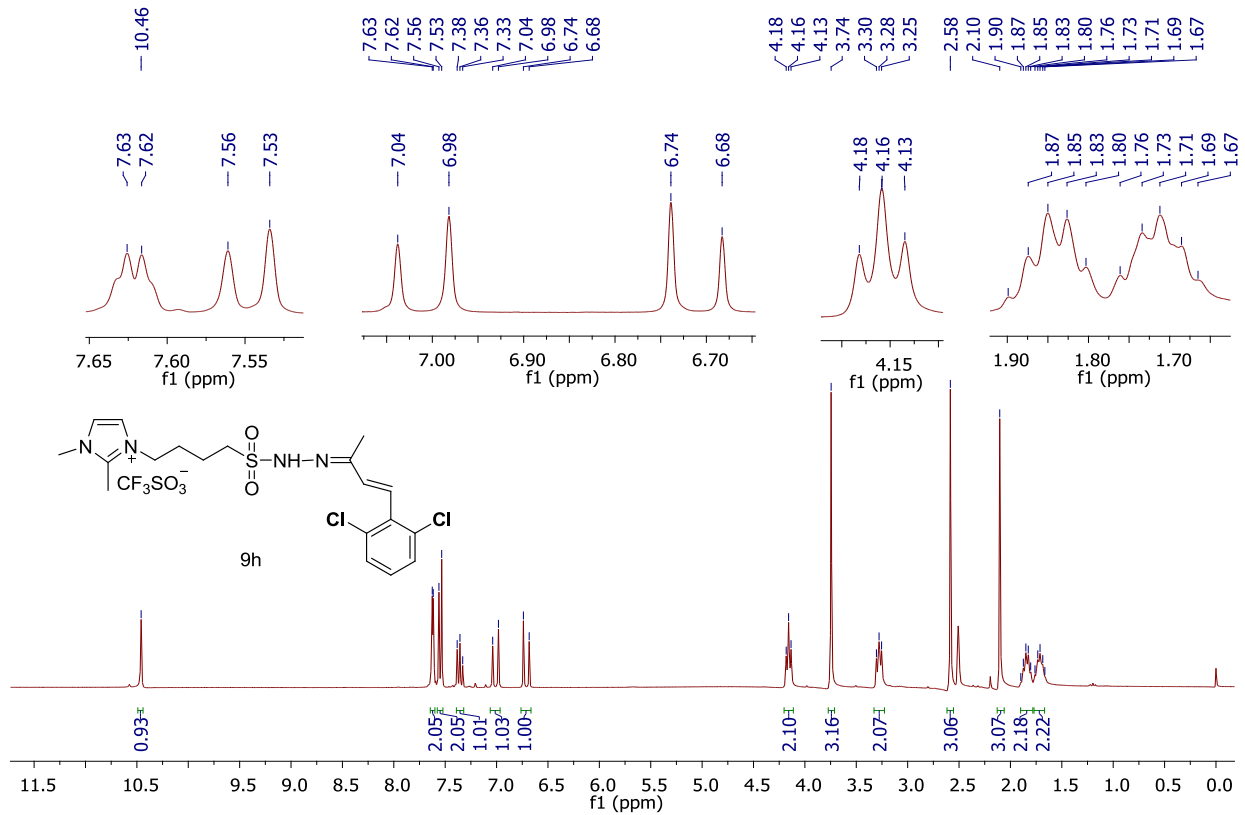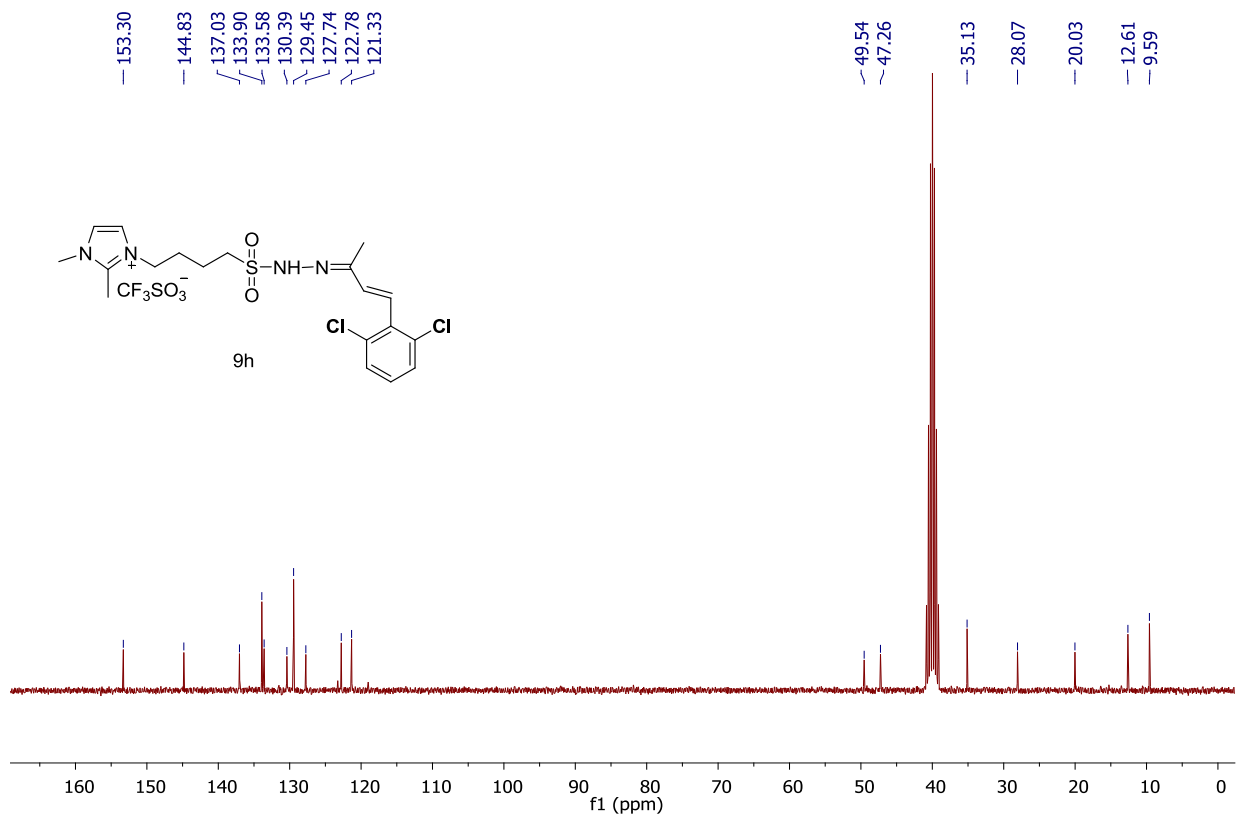



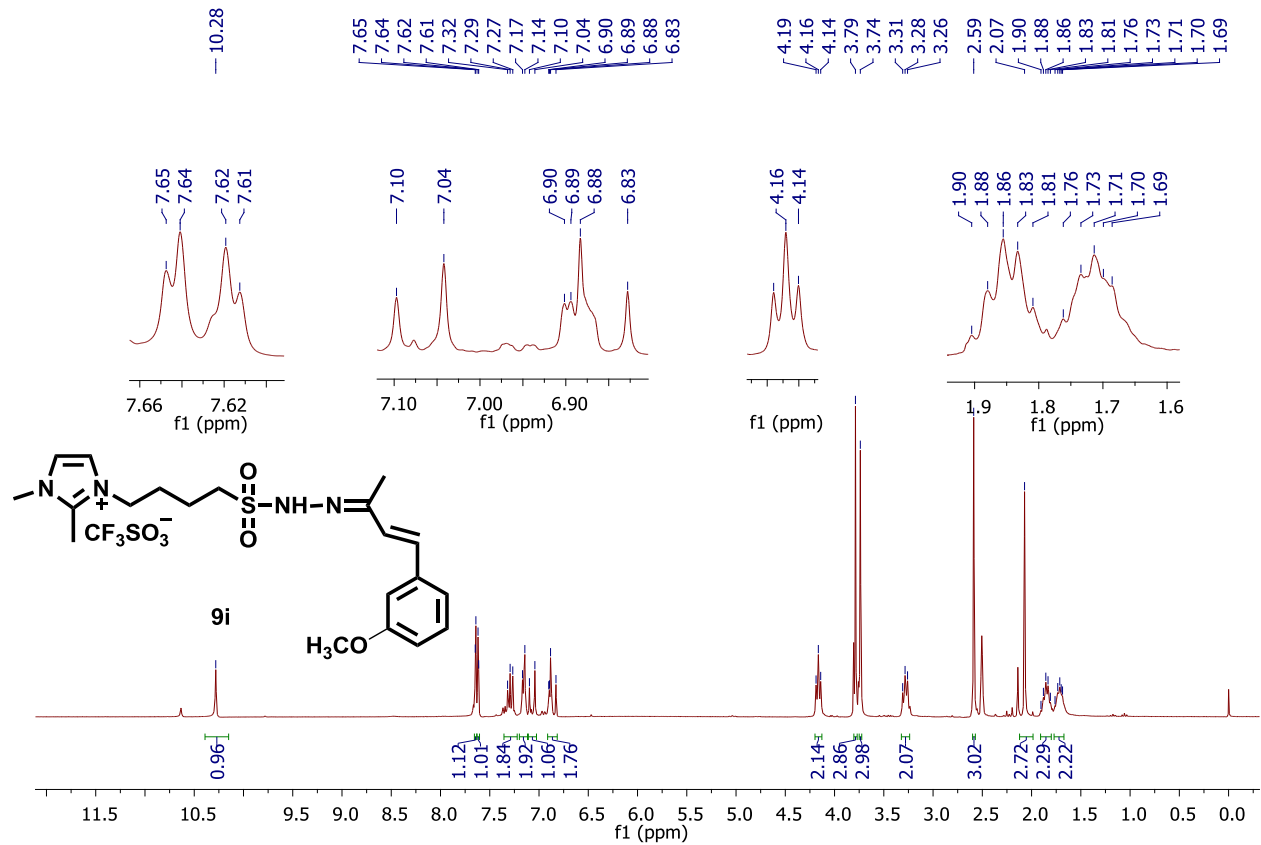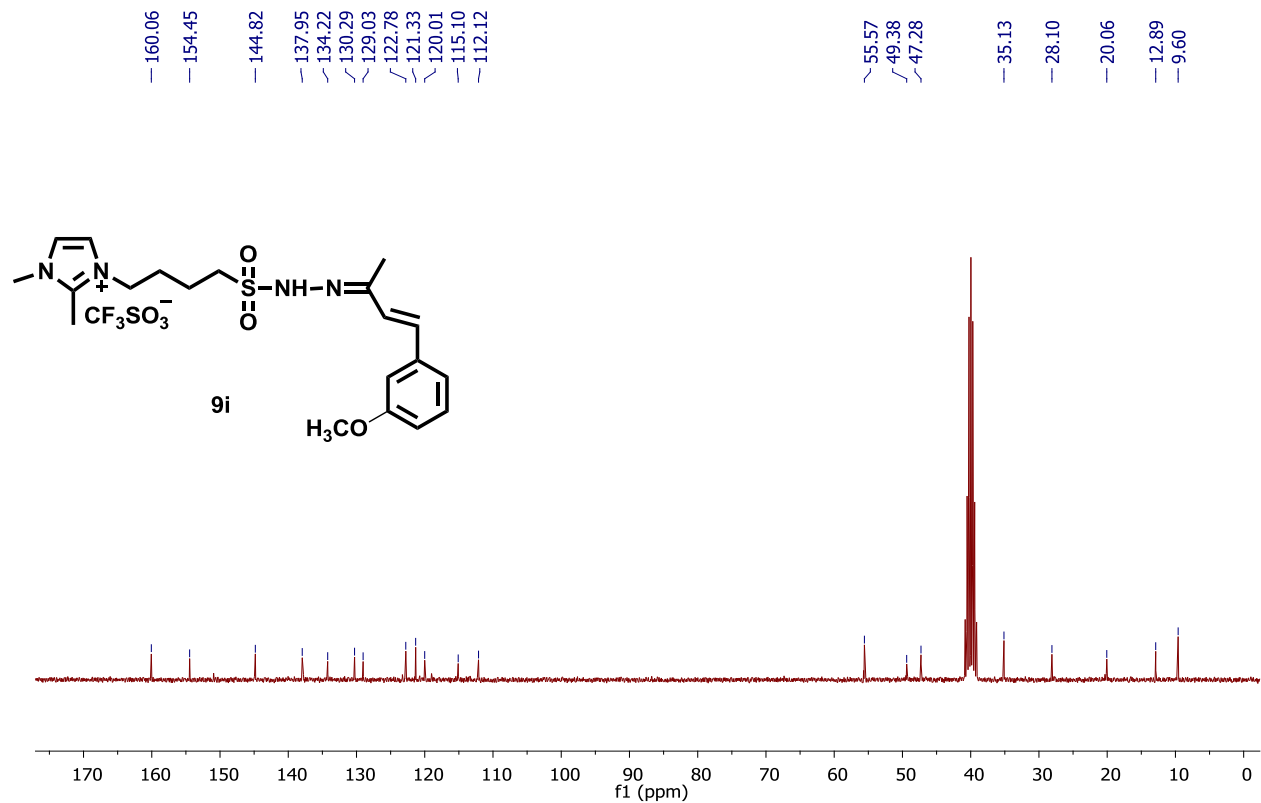

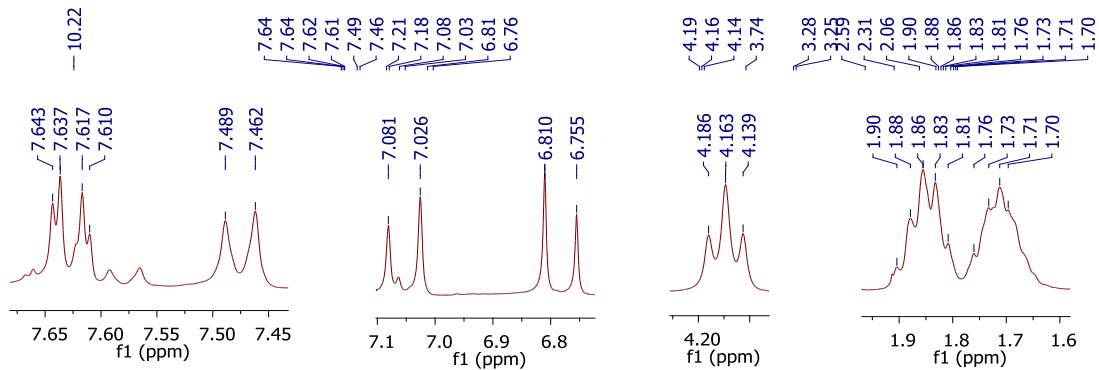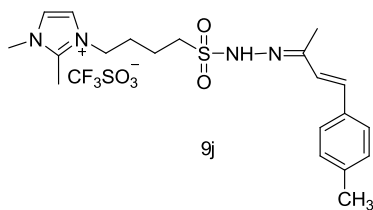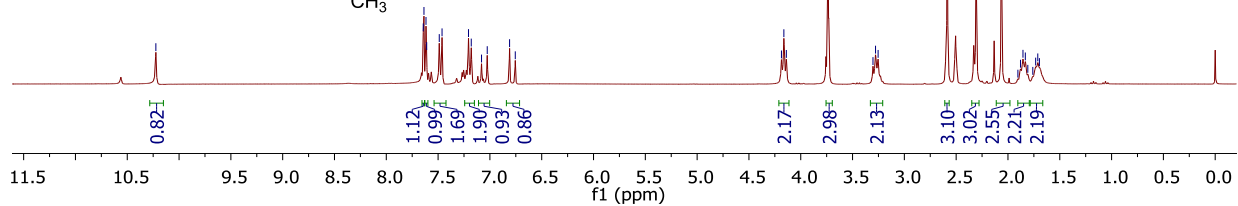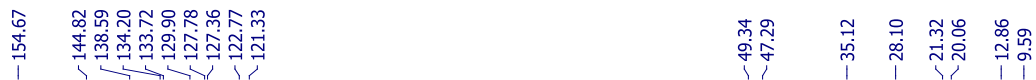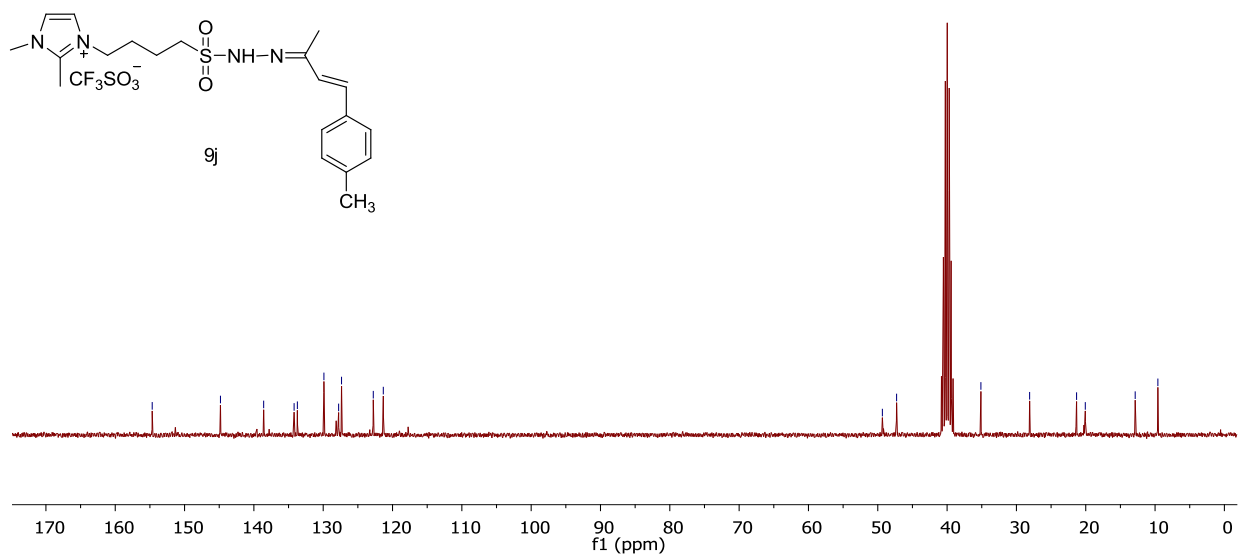

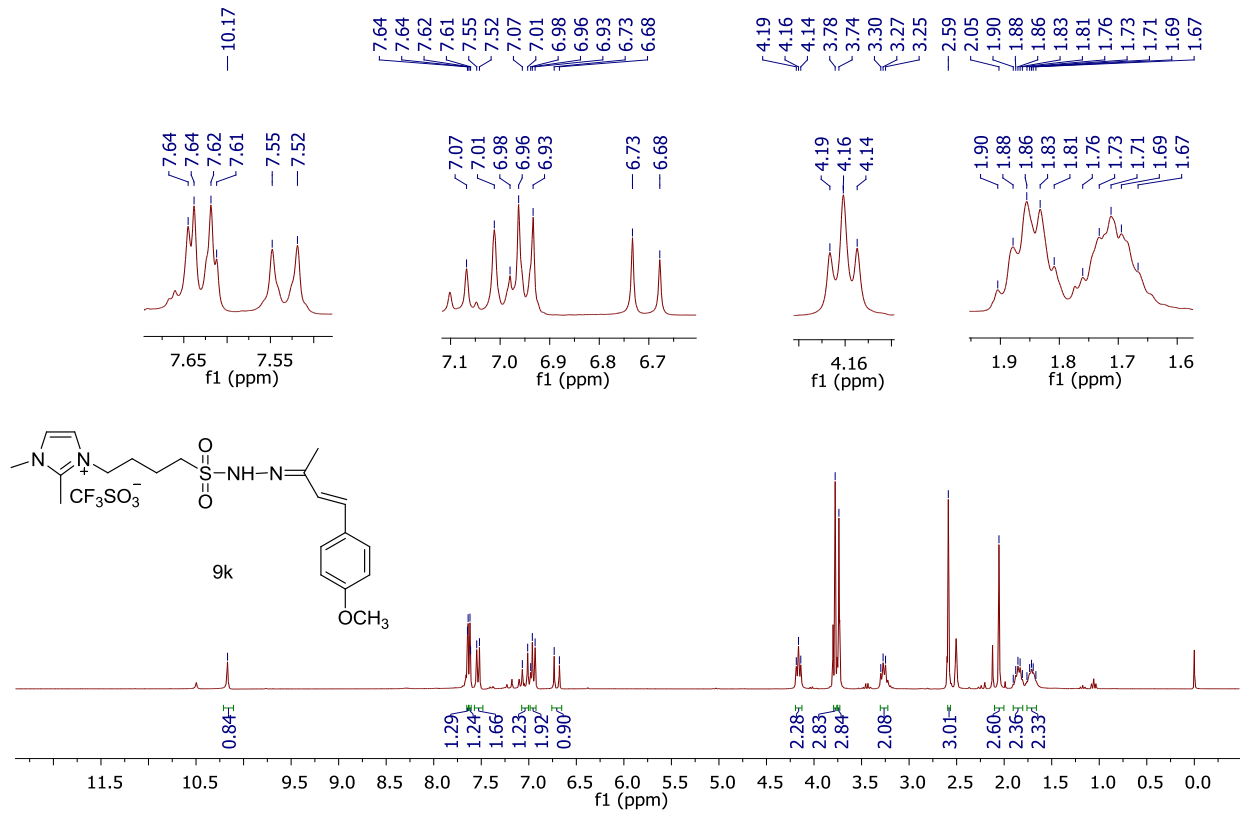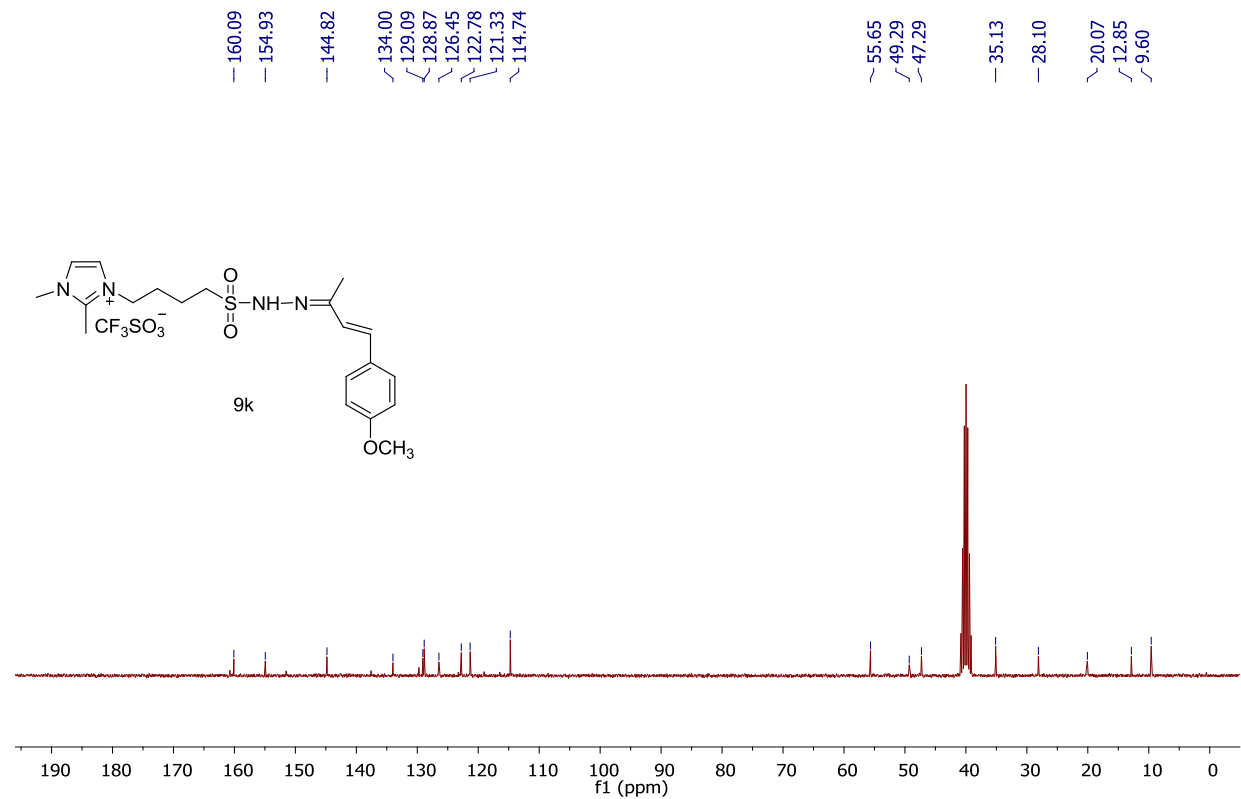

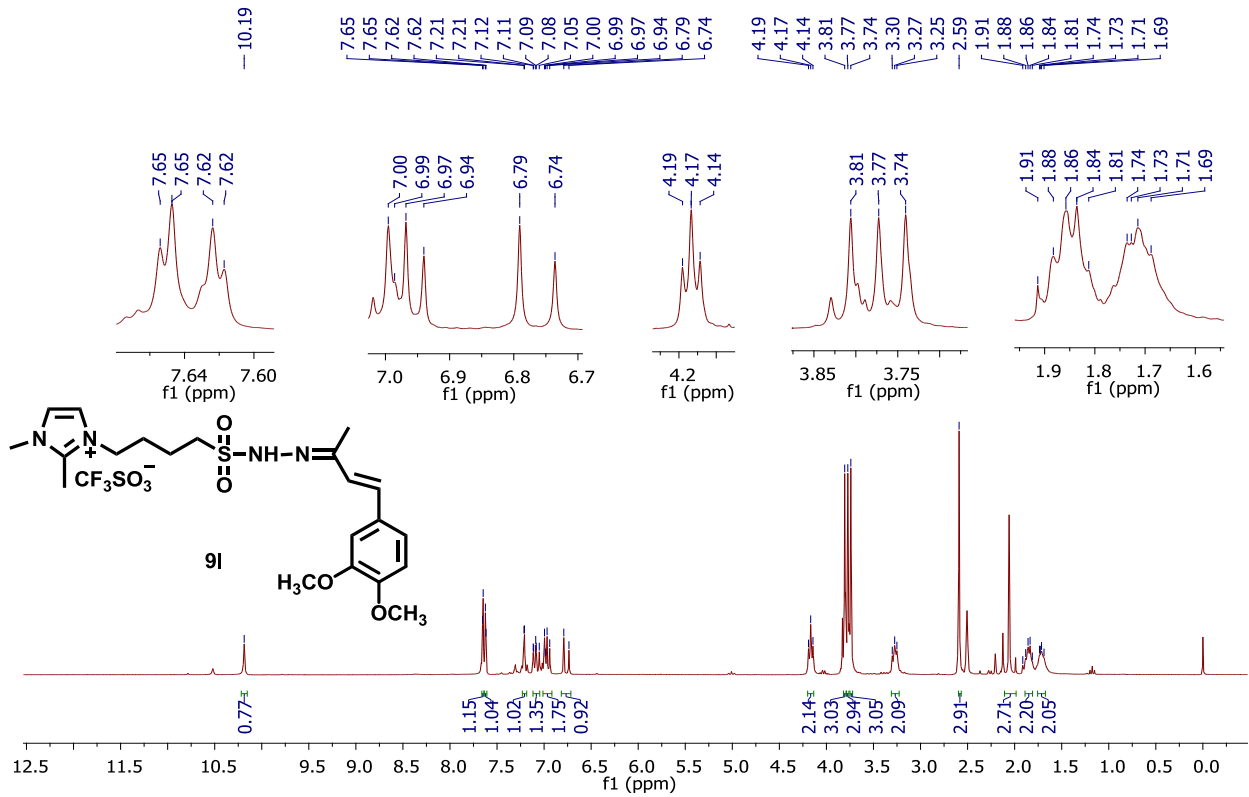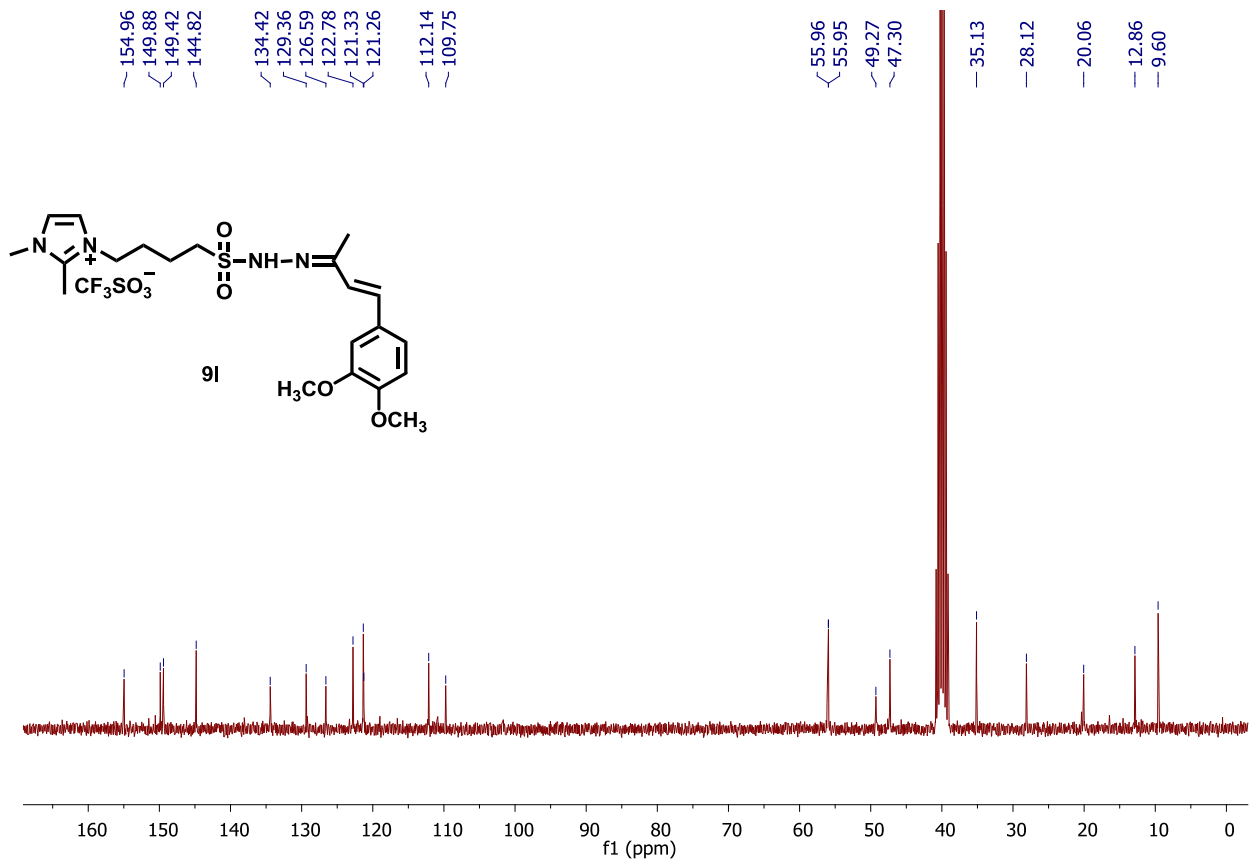

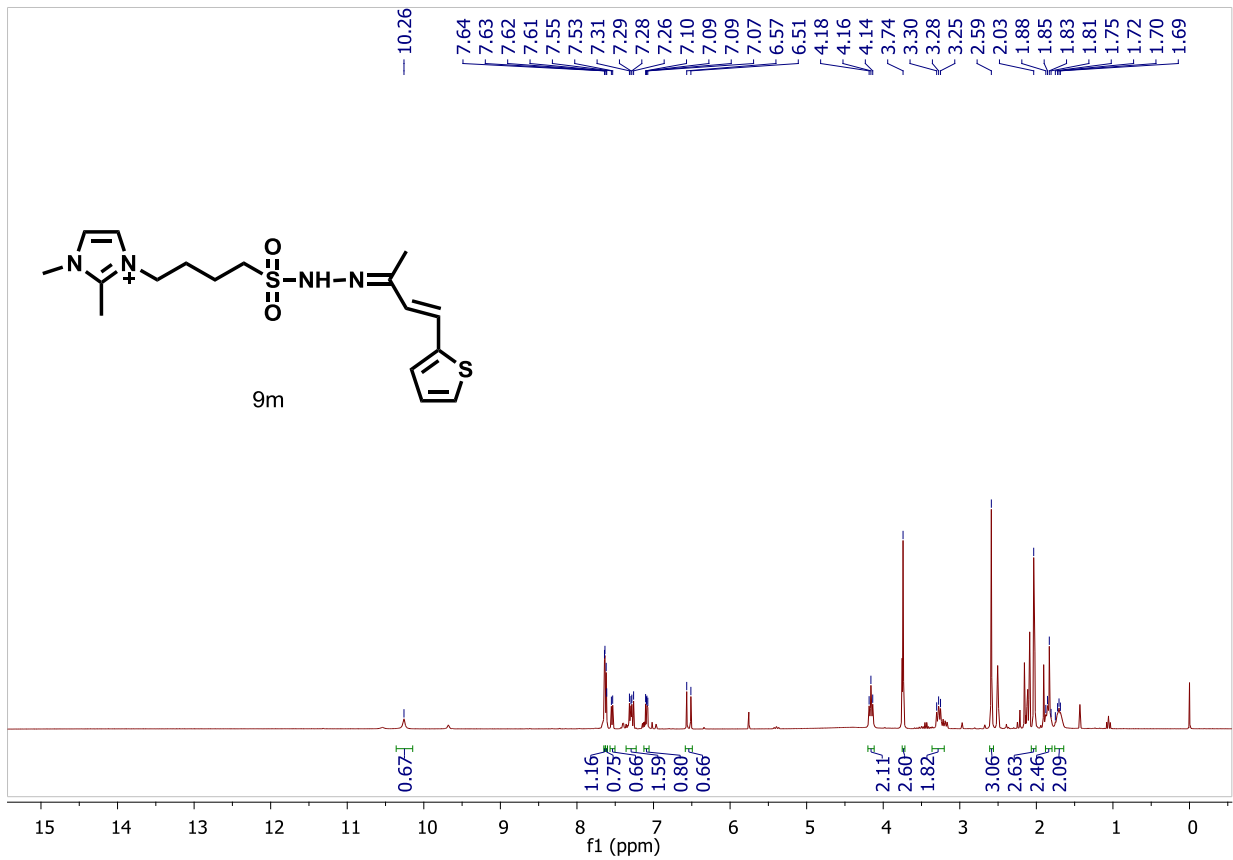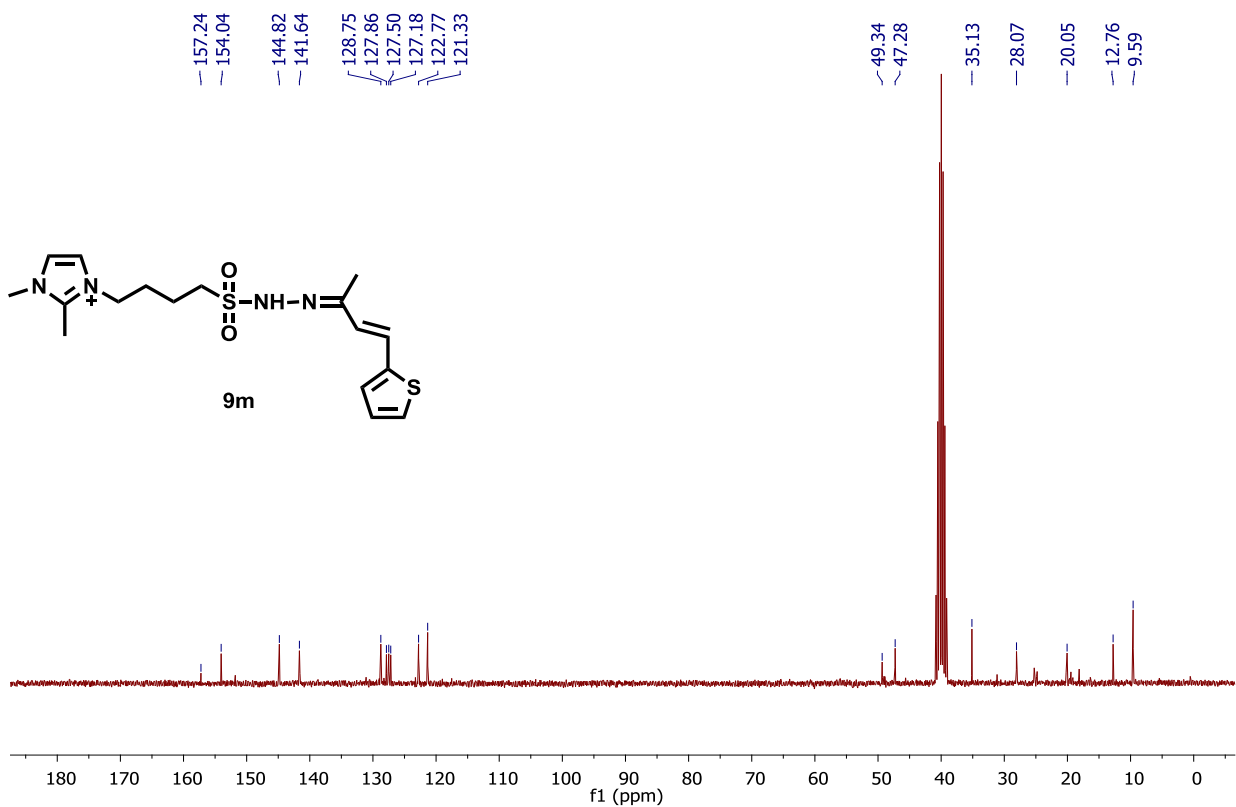

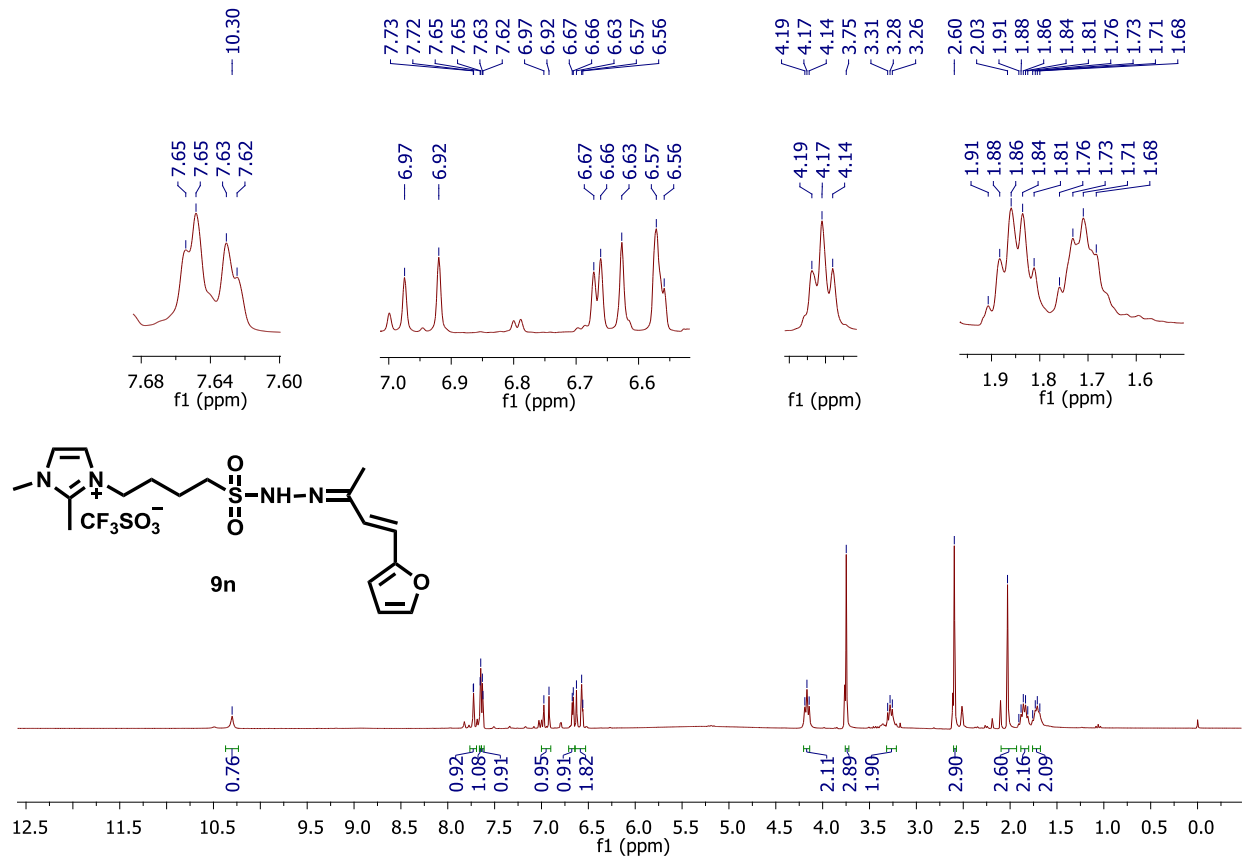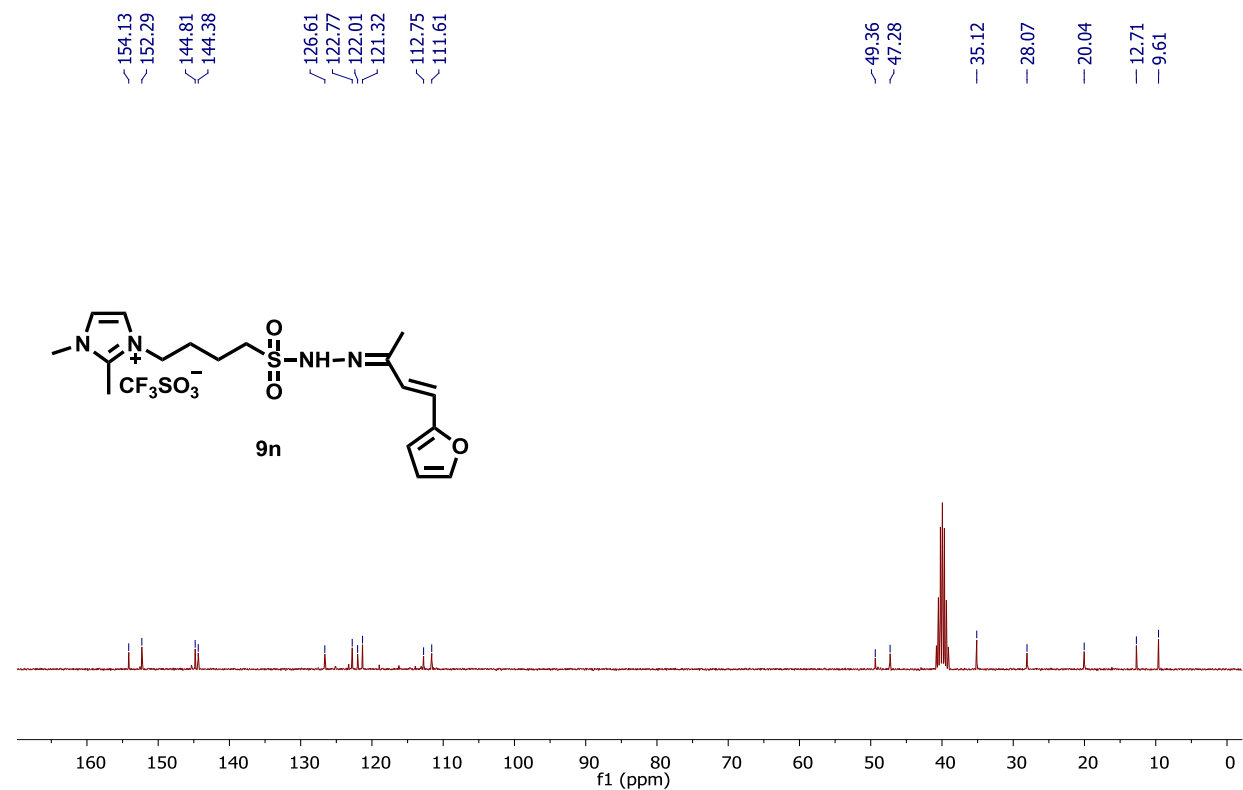

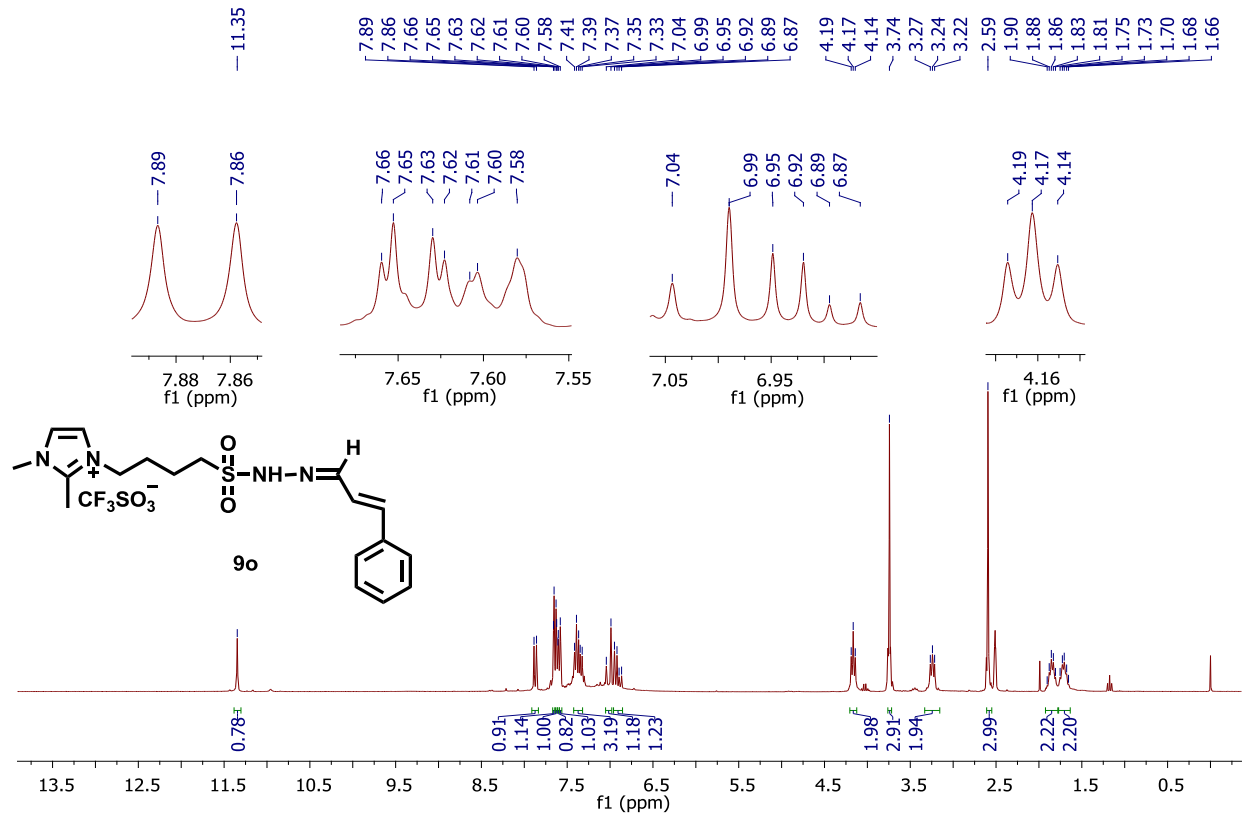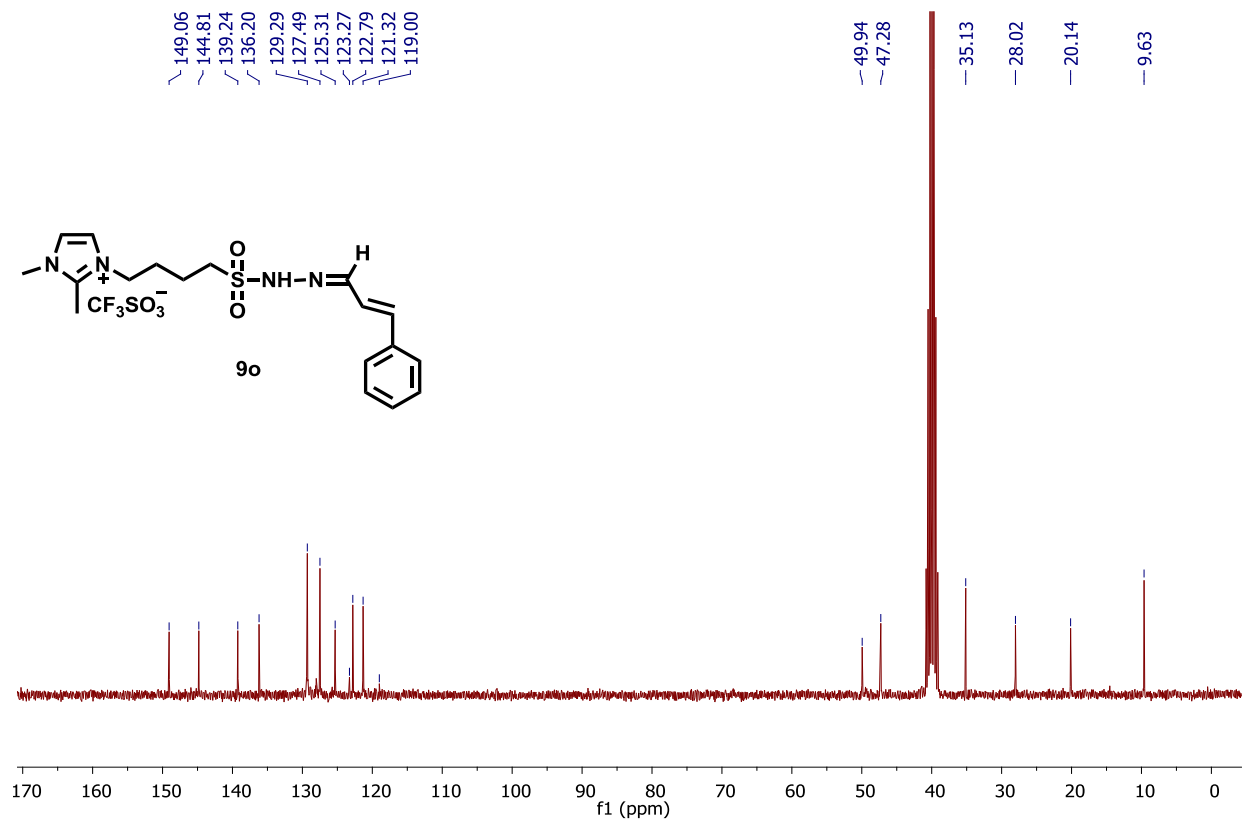

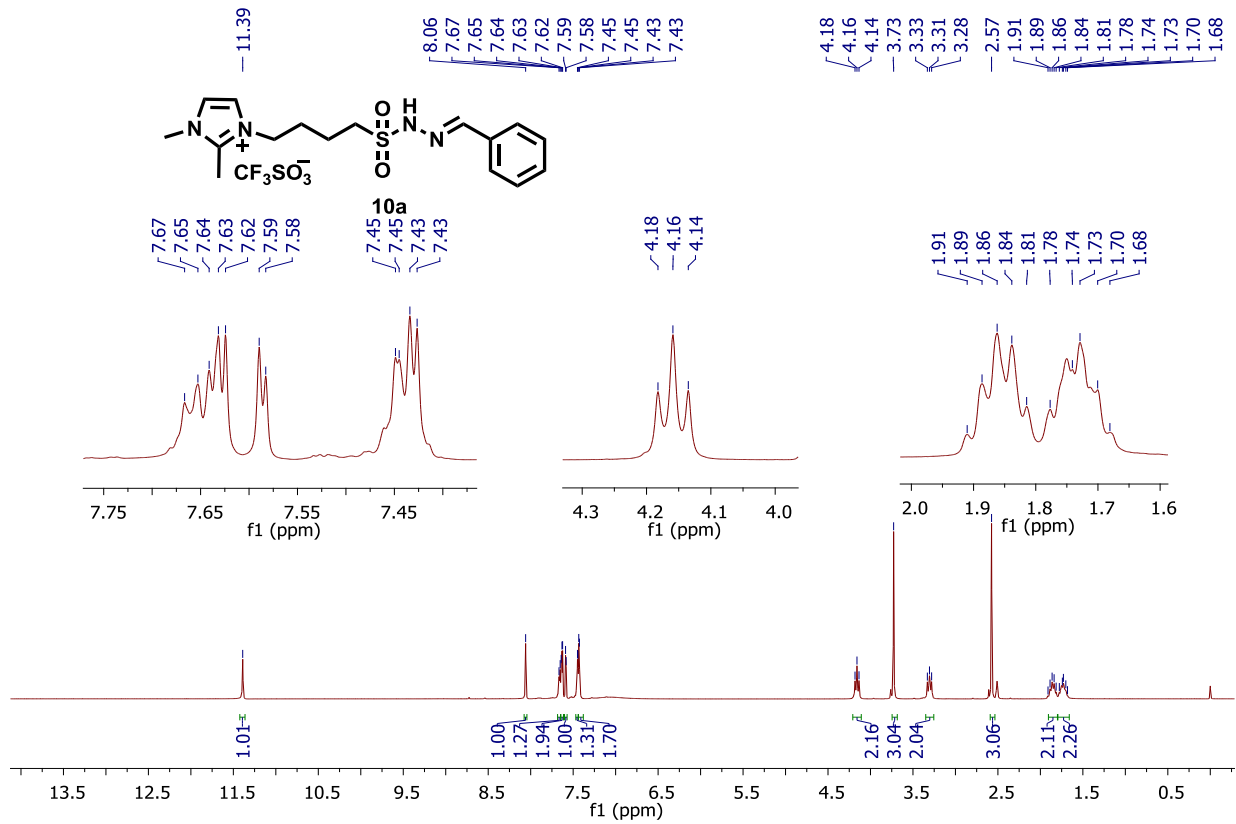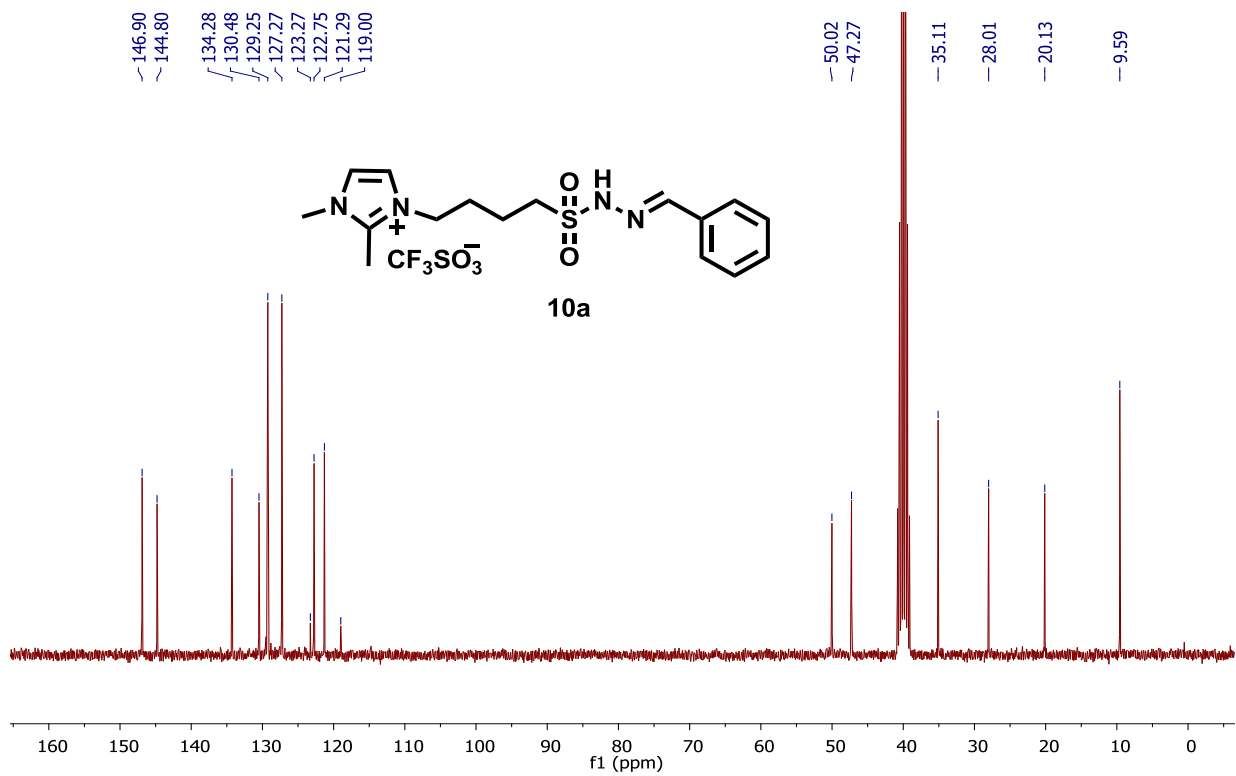



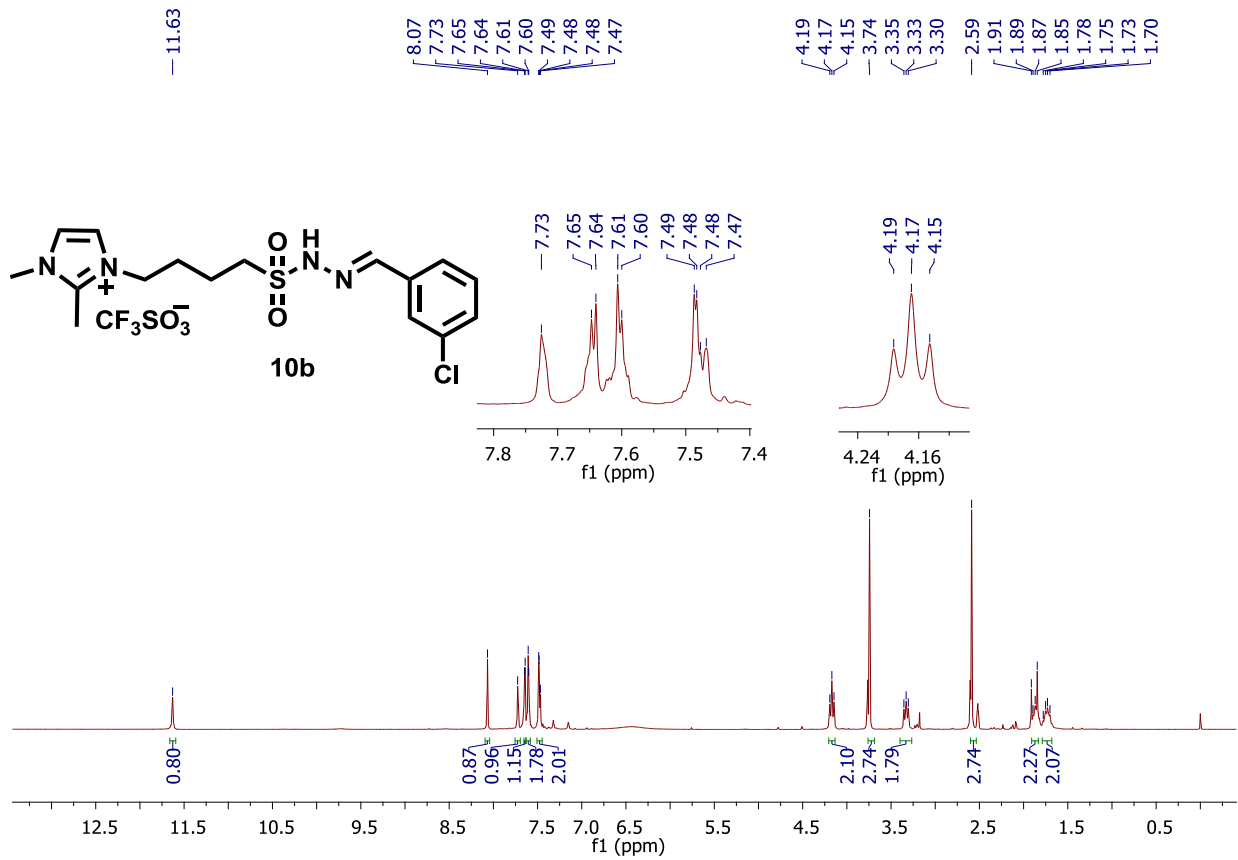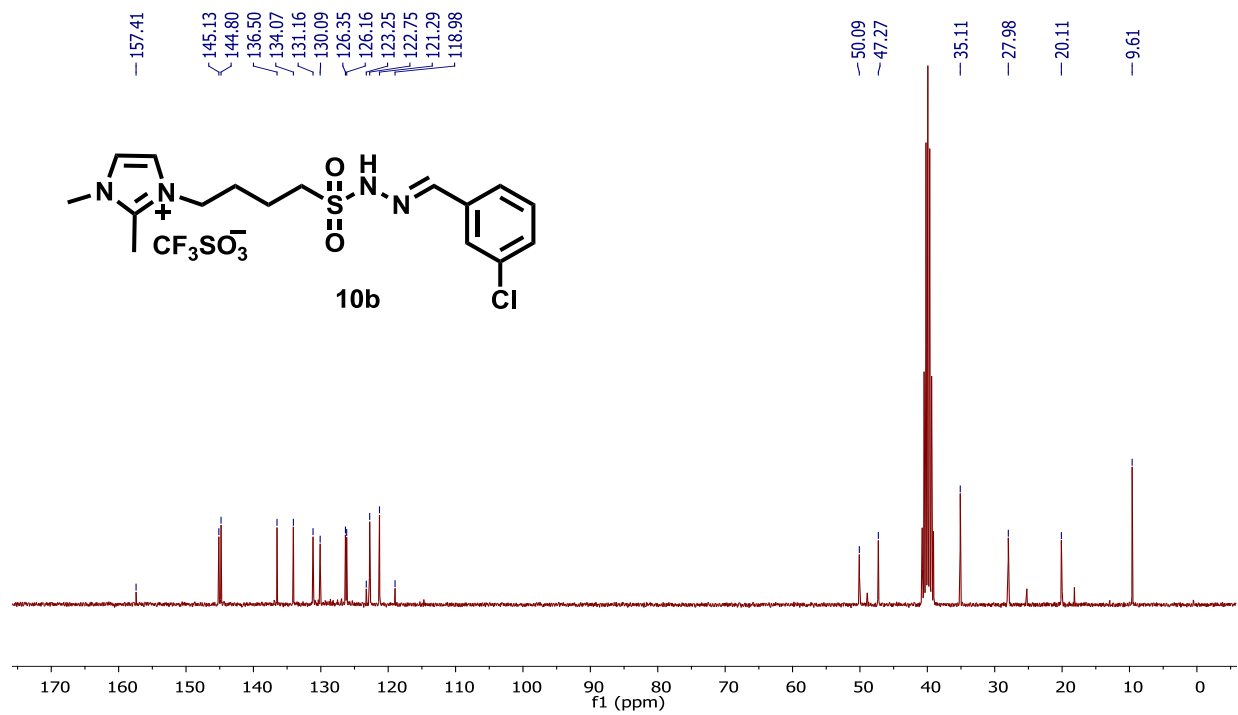

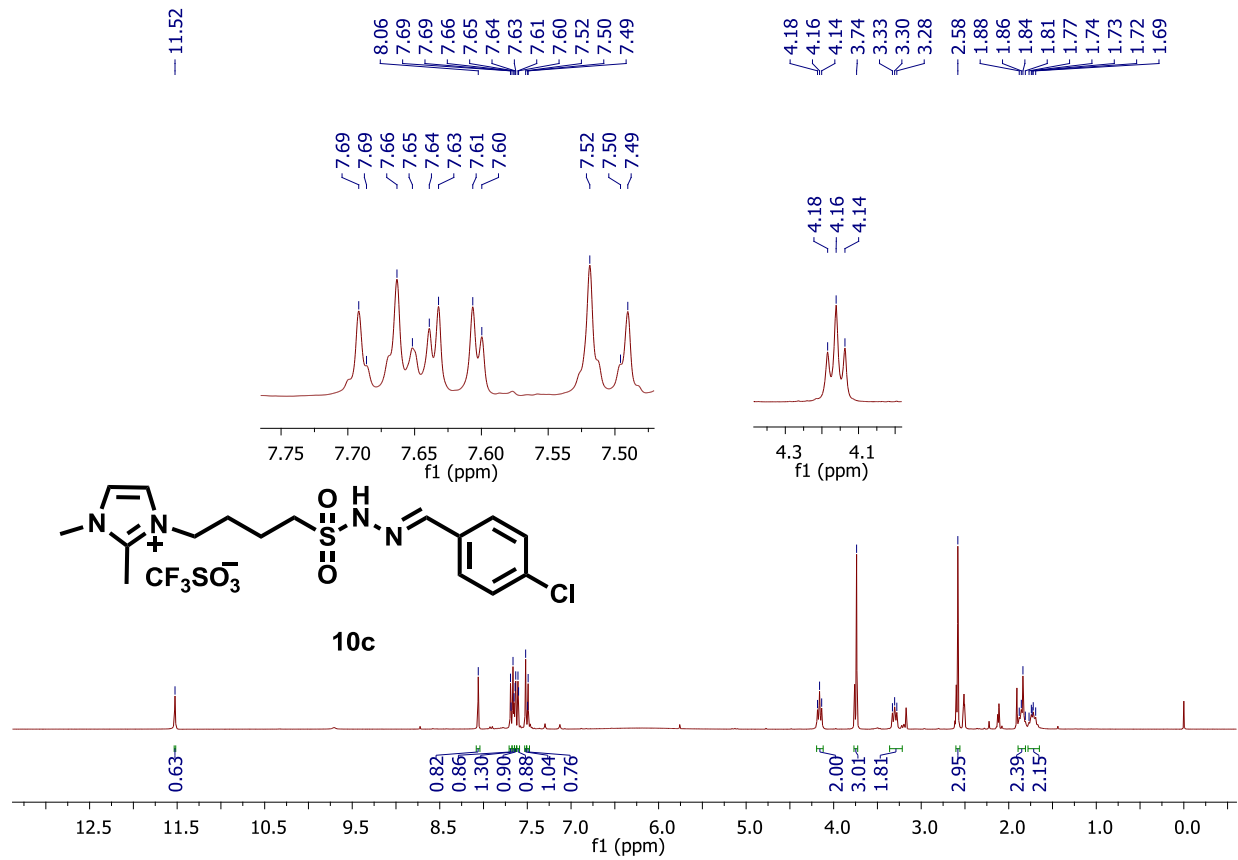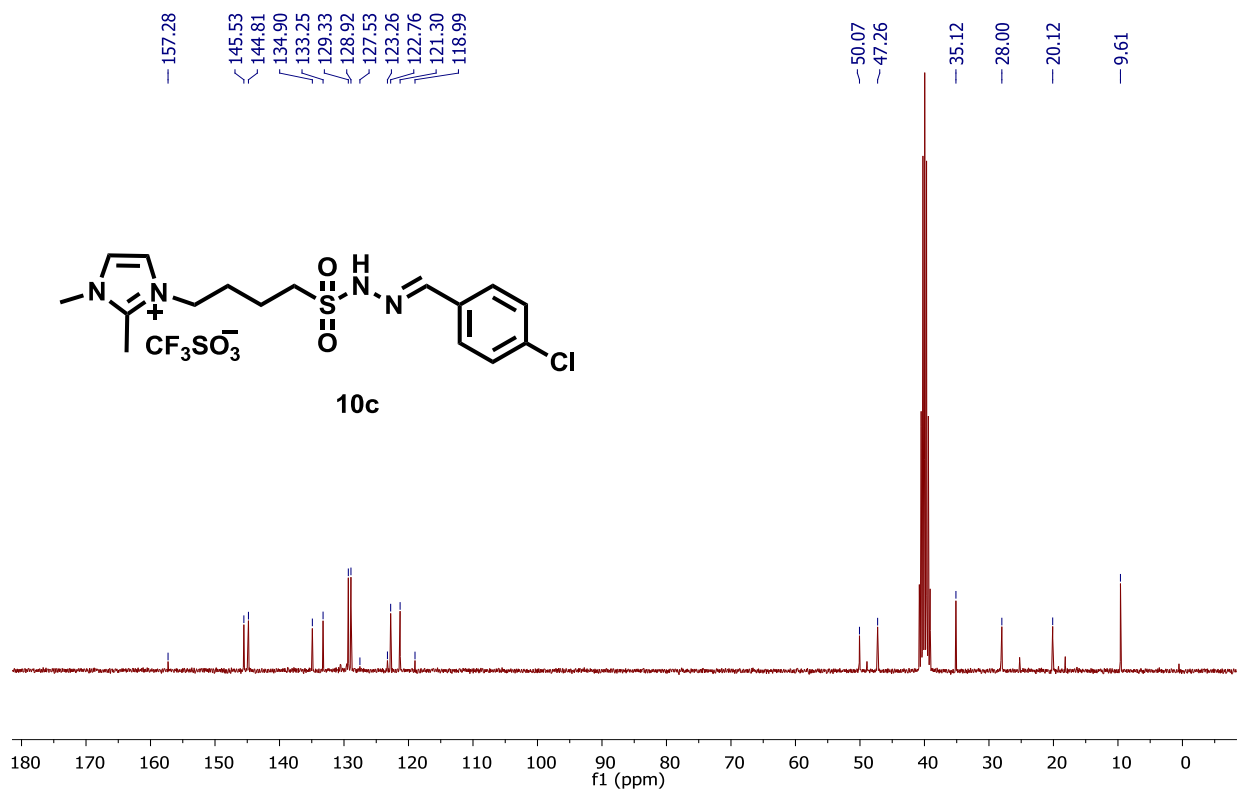

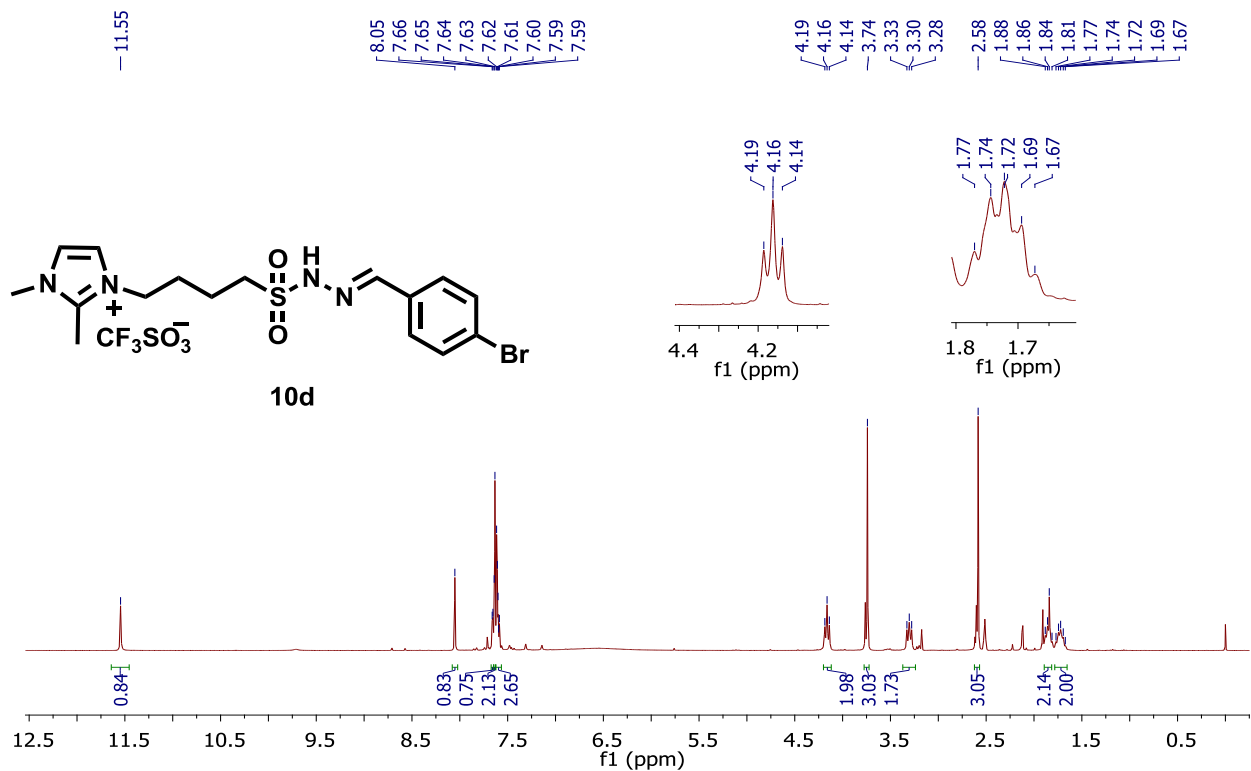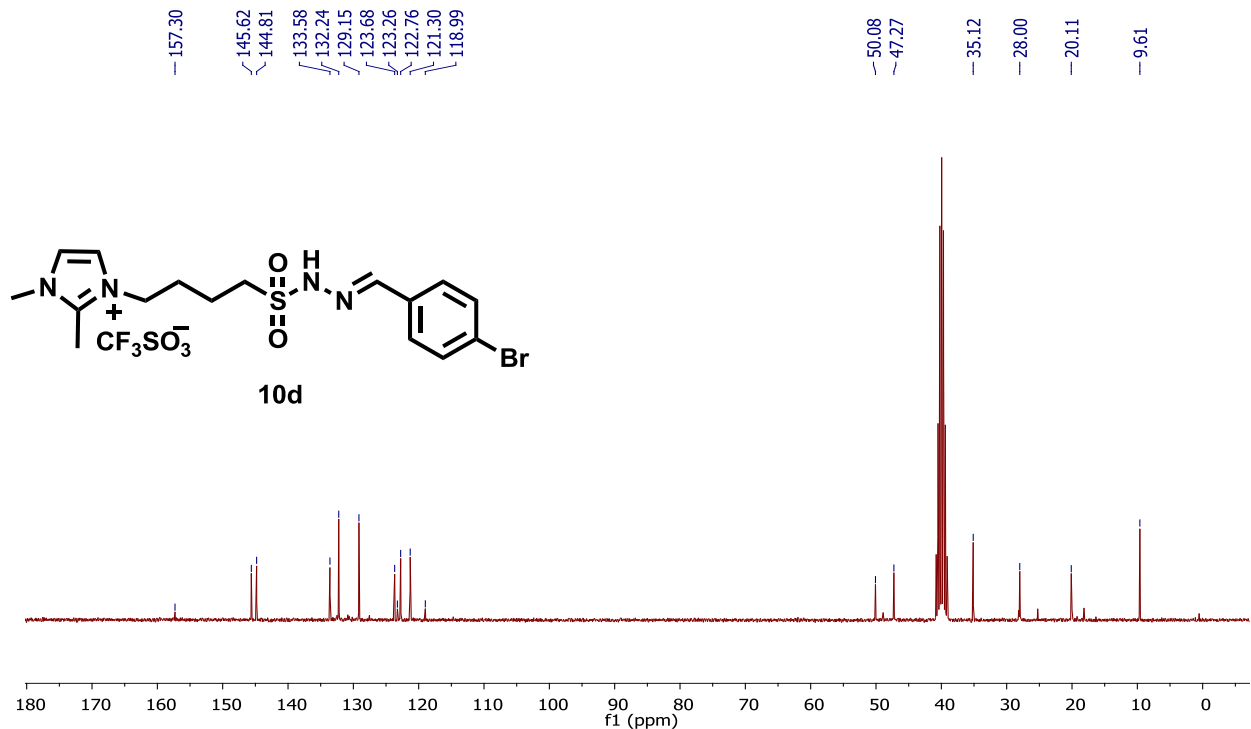

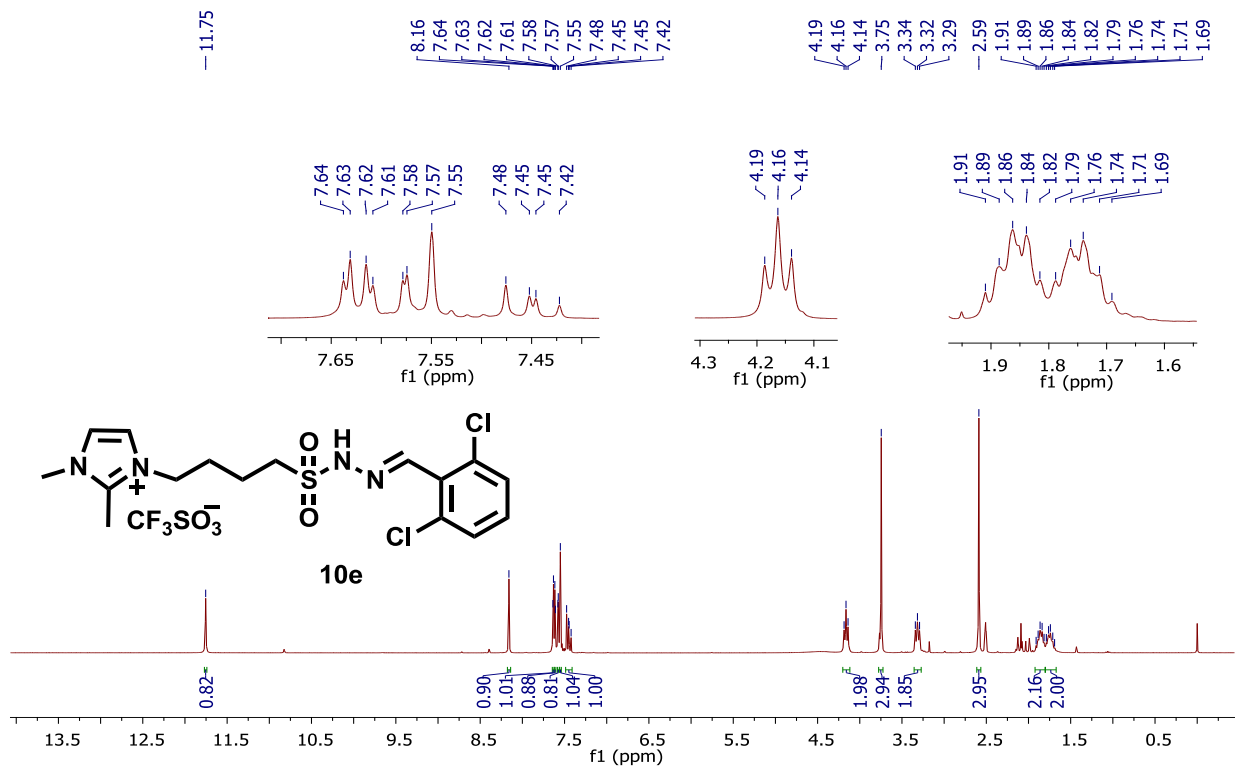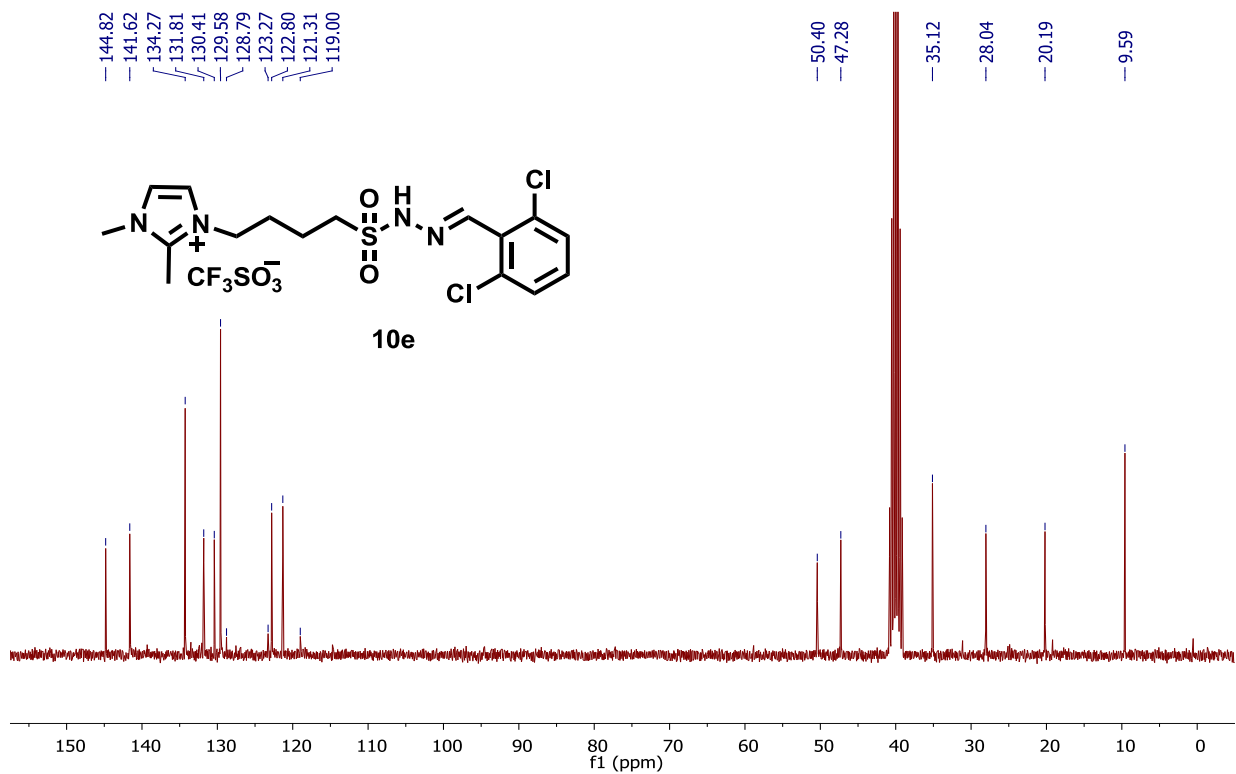

-11.30

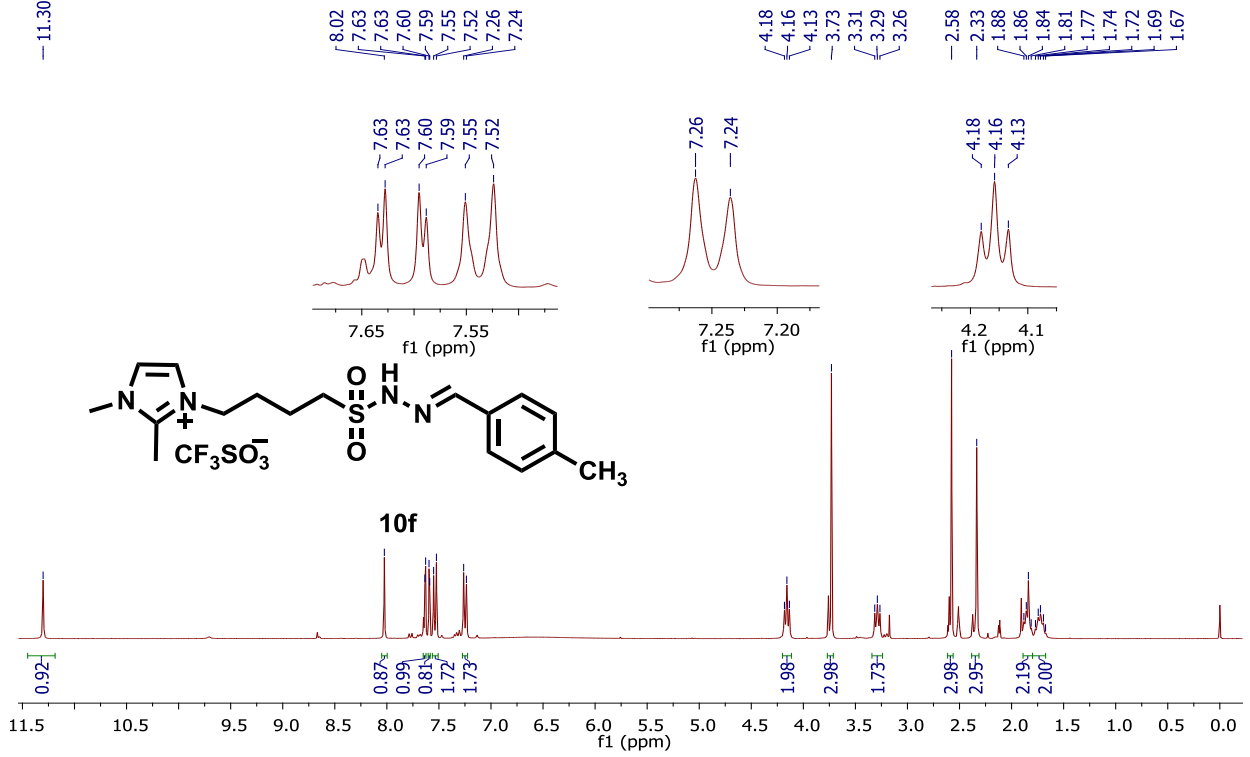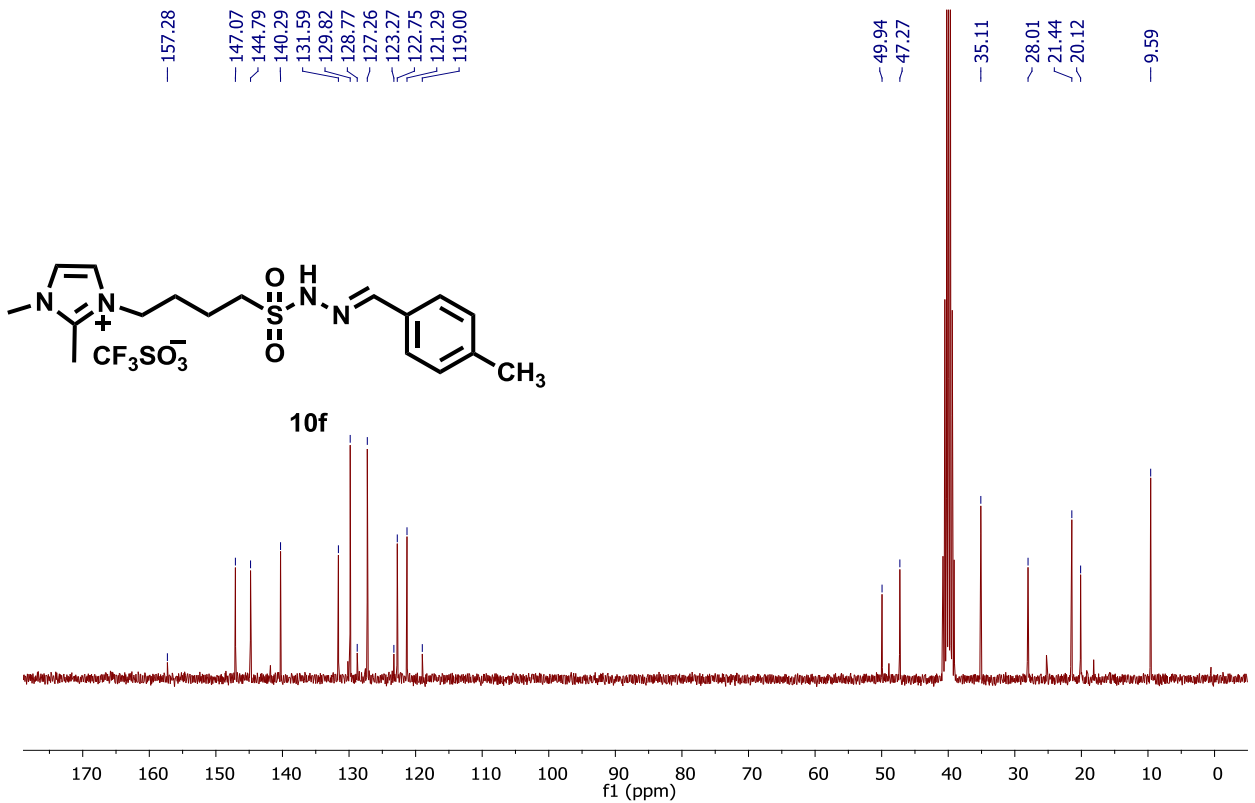

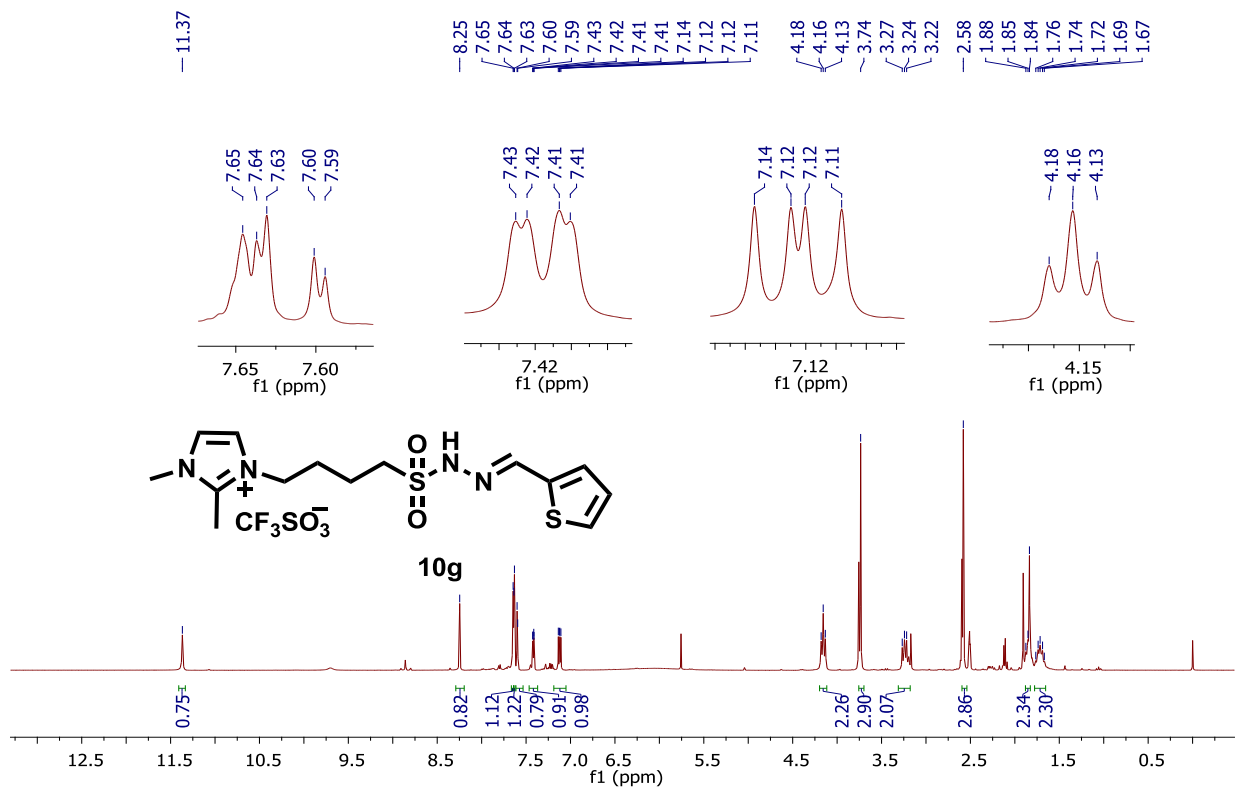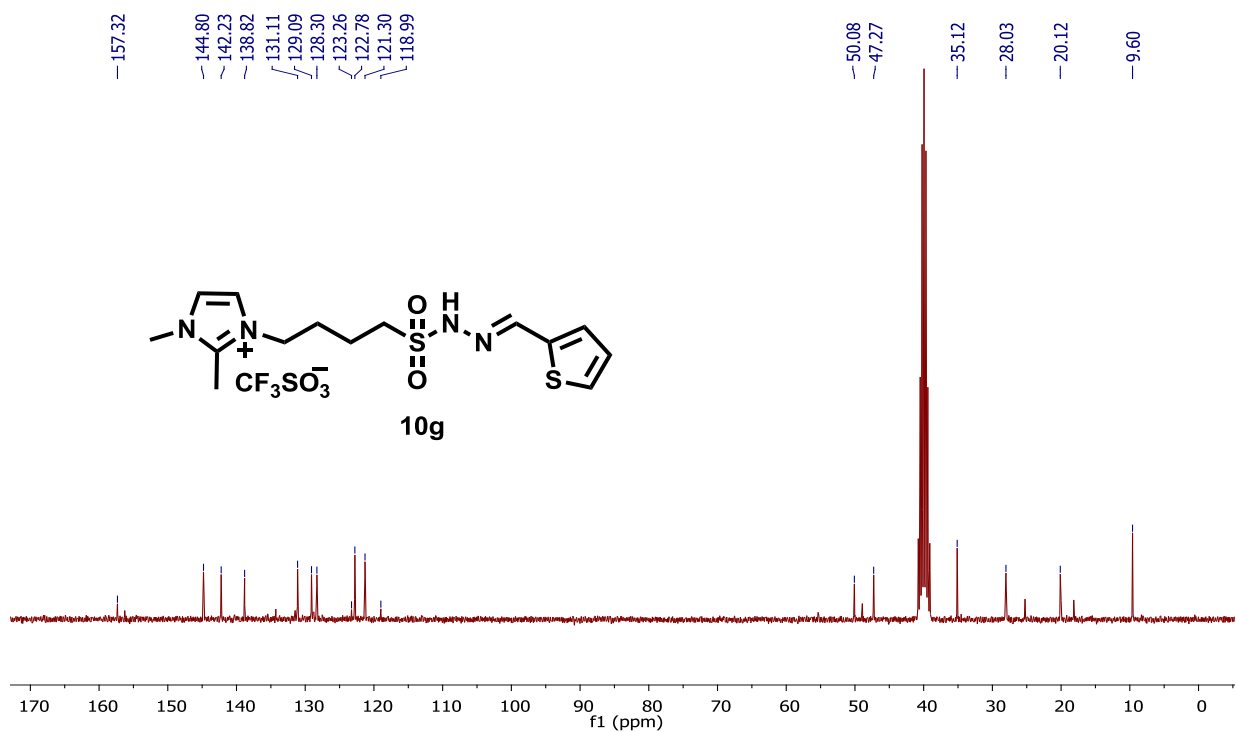

3. Copies of  $^1\text{H}$  and  $^{13}\text{C}$  NMR of pyrazoles **11** & **13**.

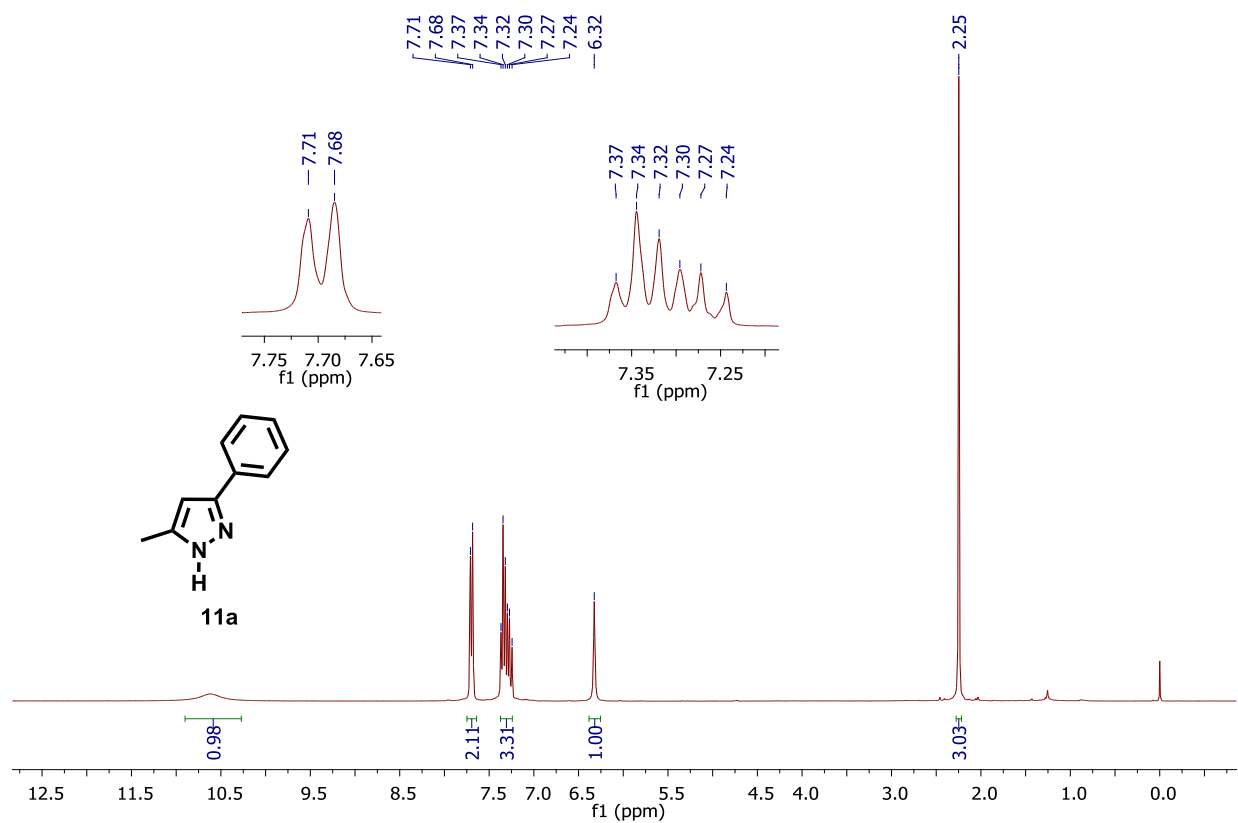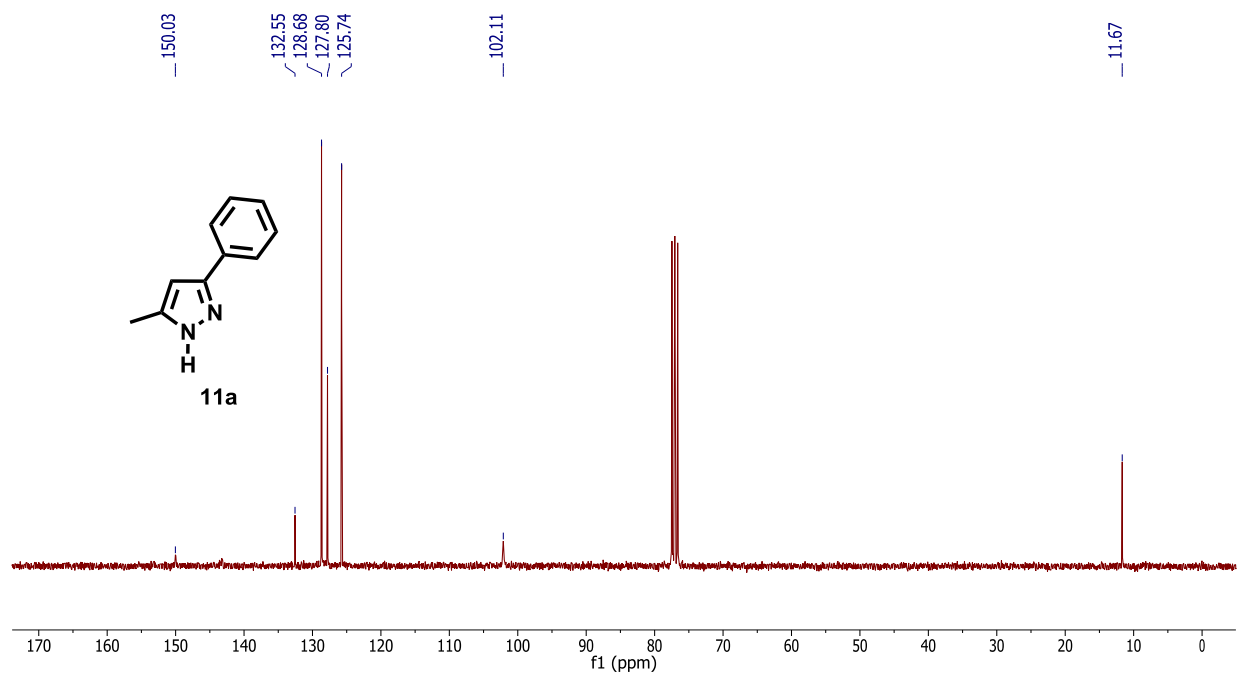

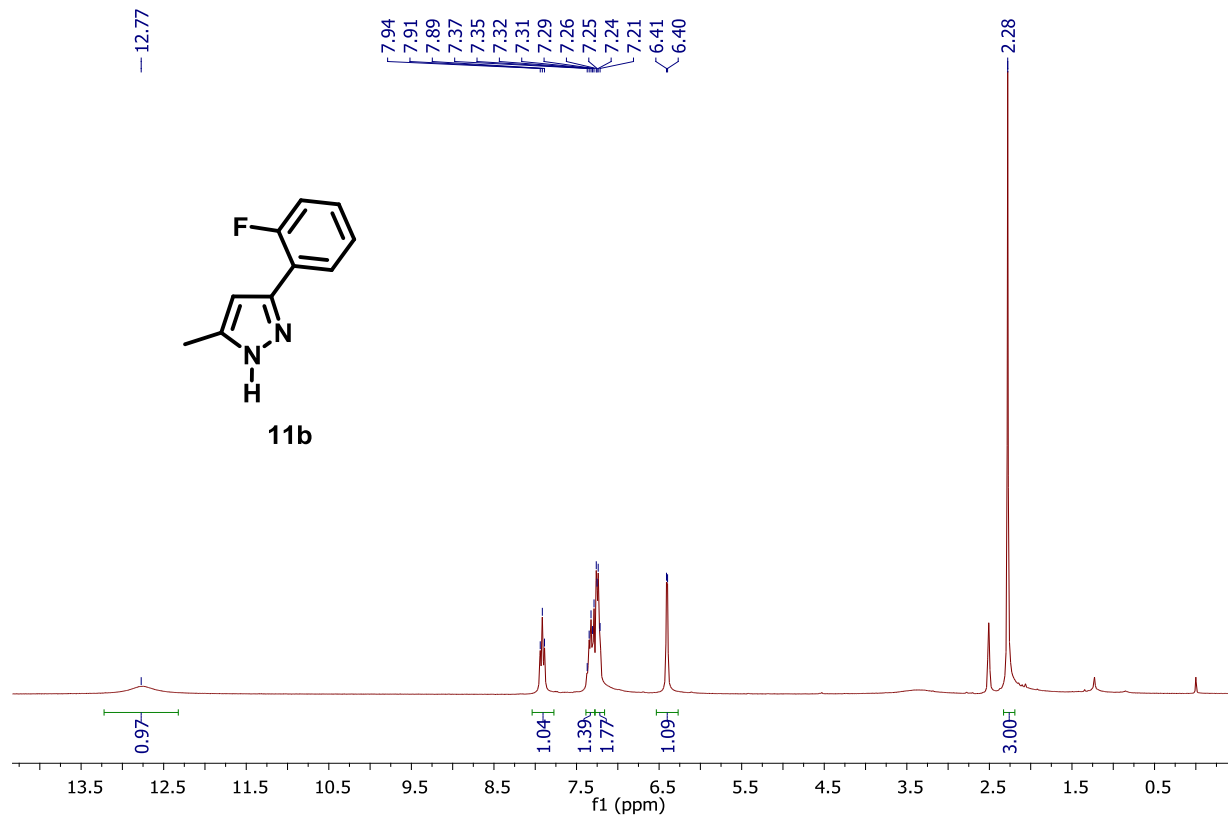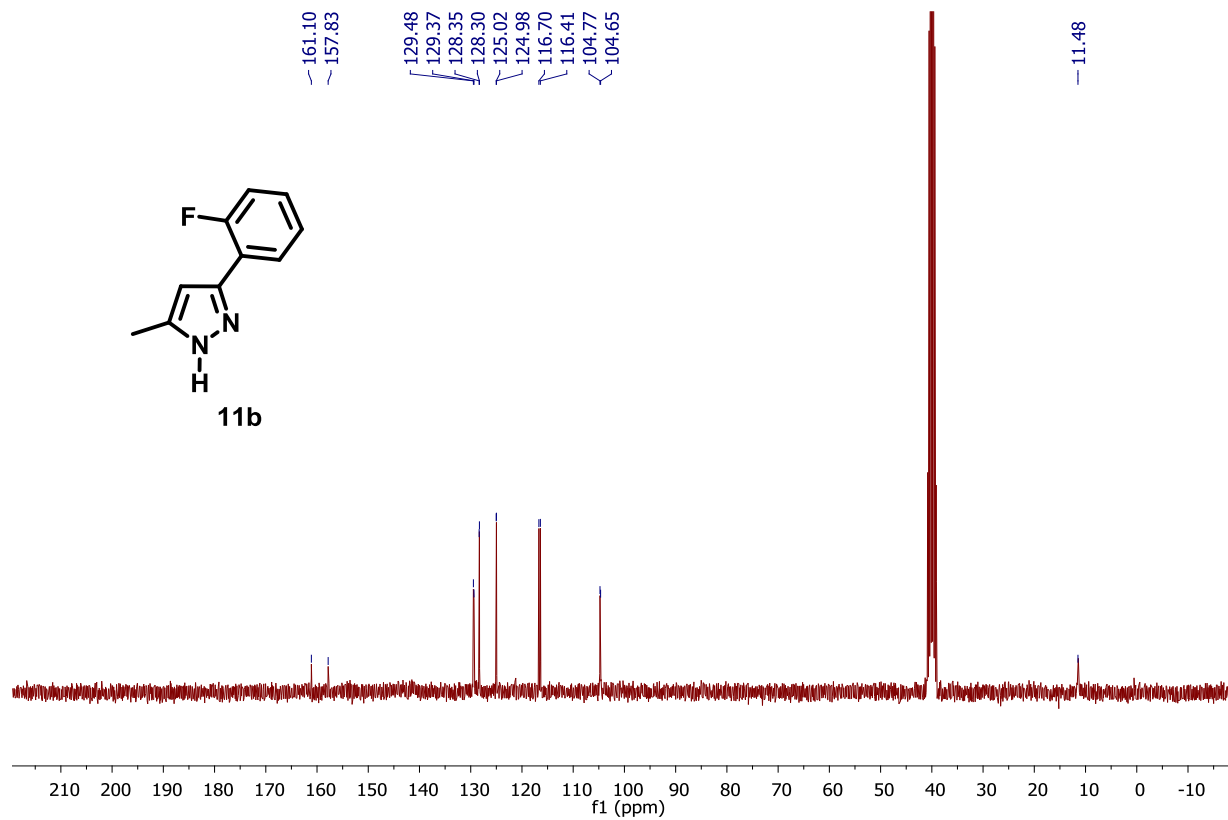



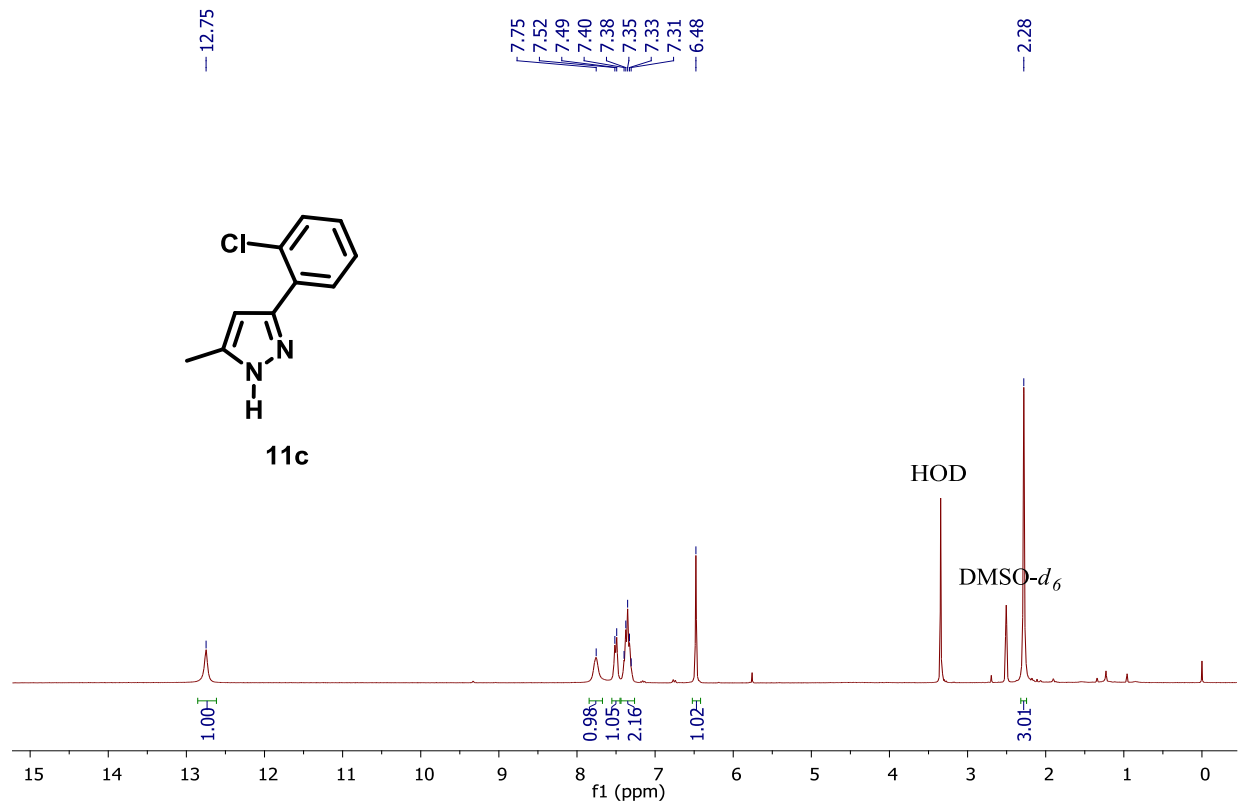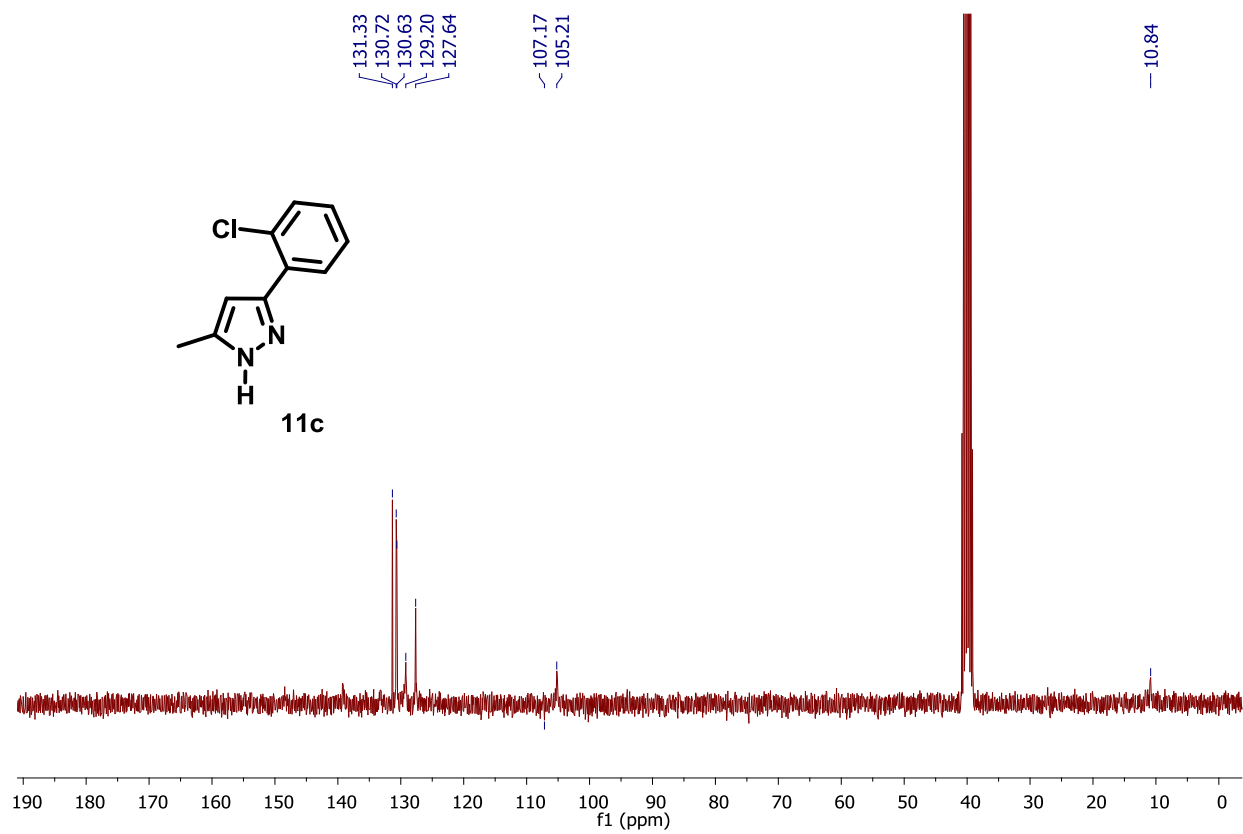

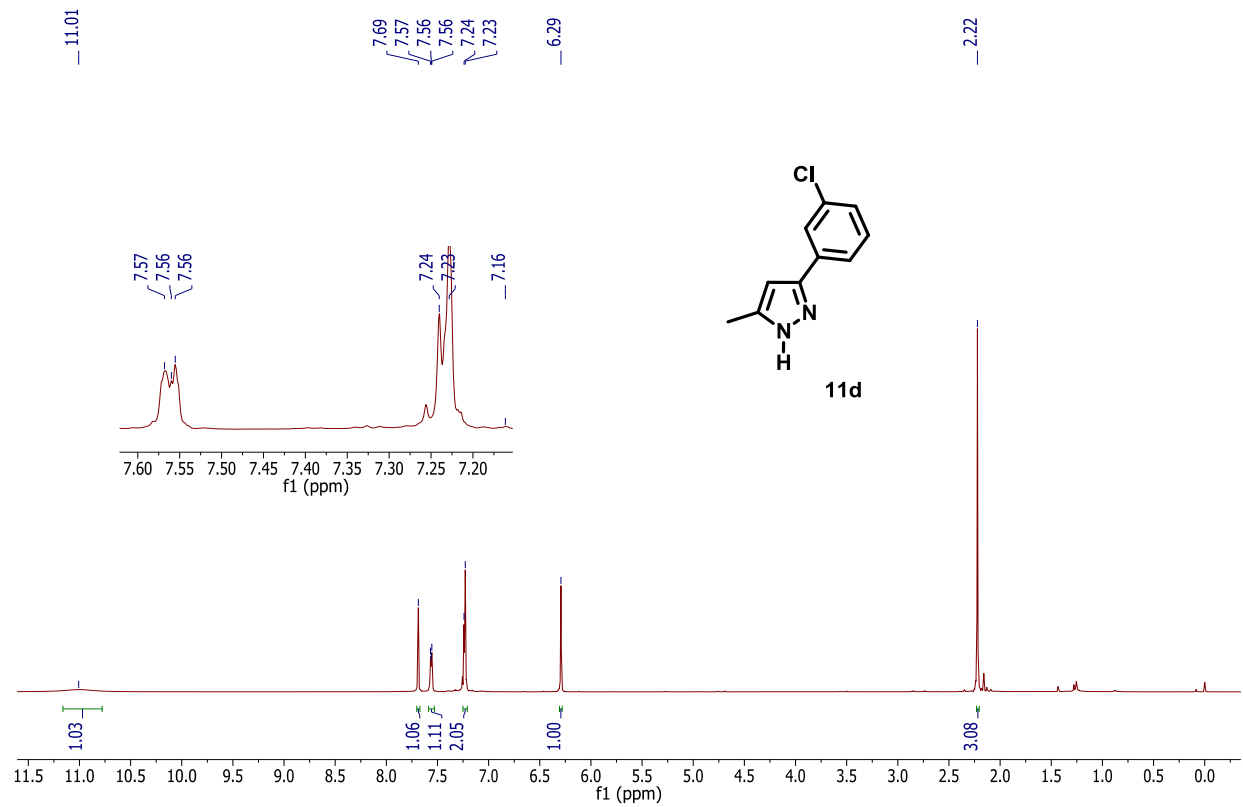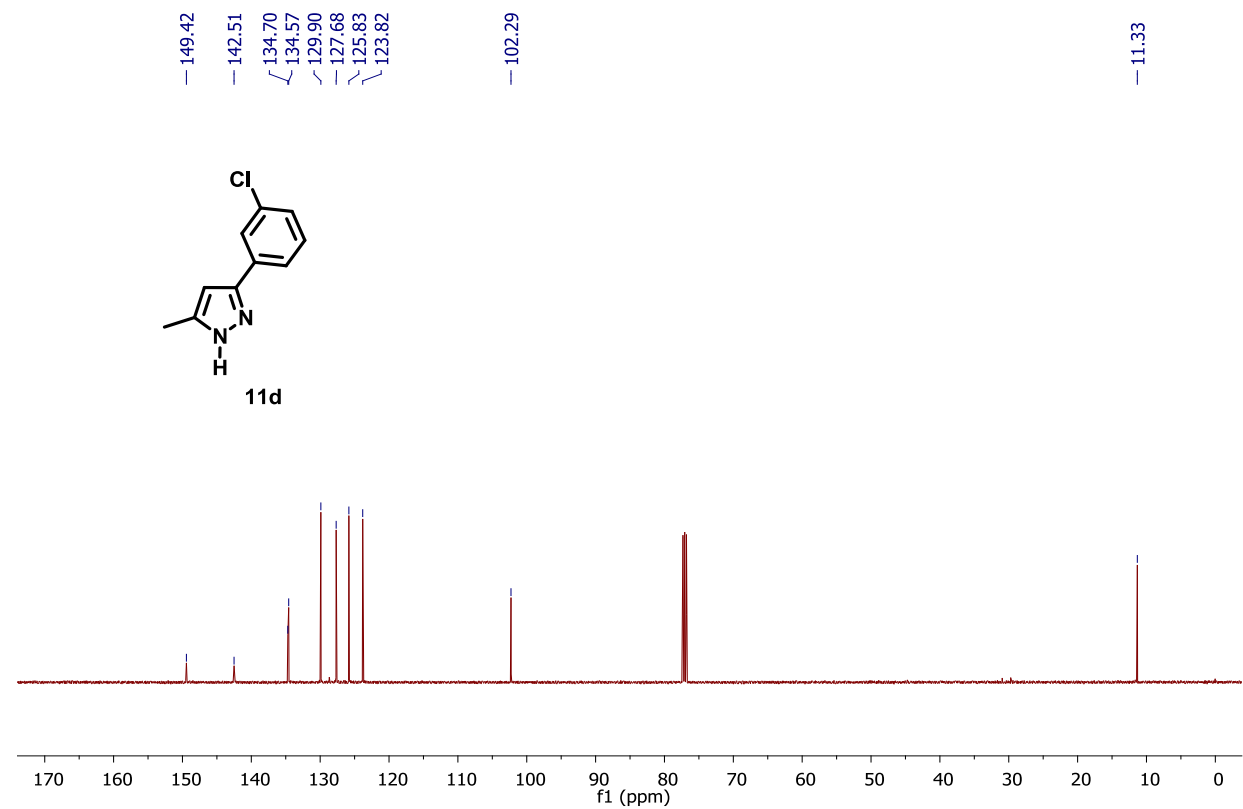

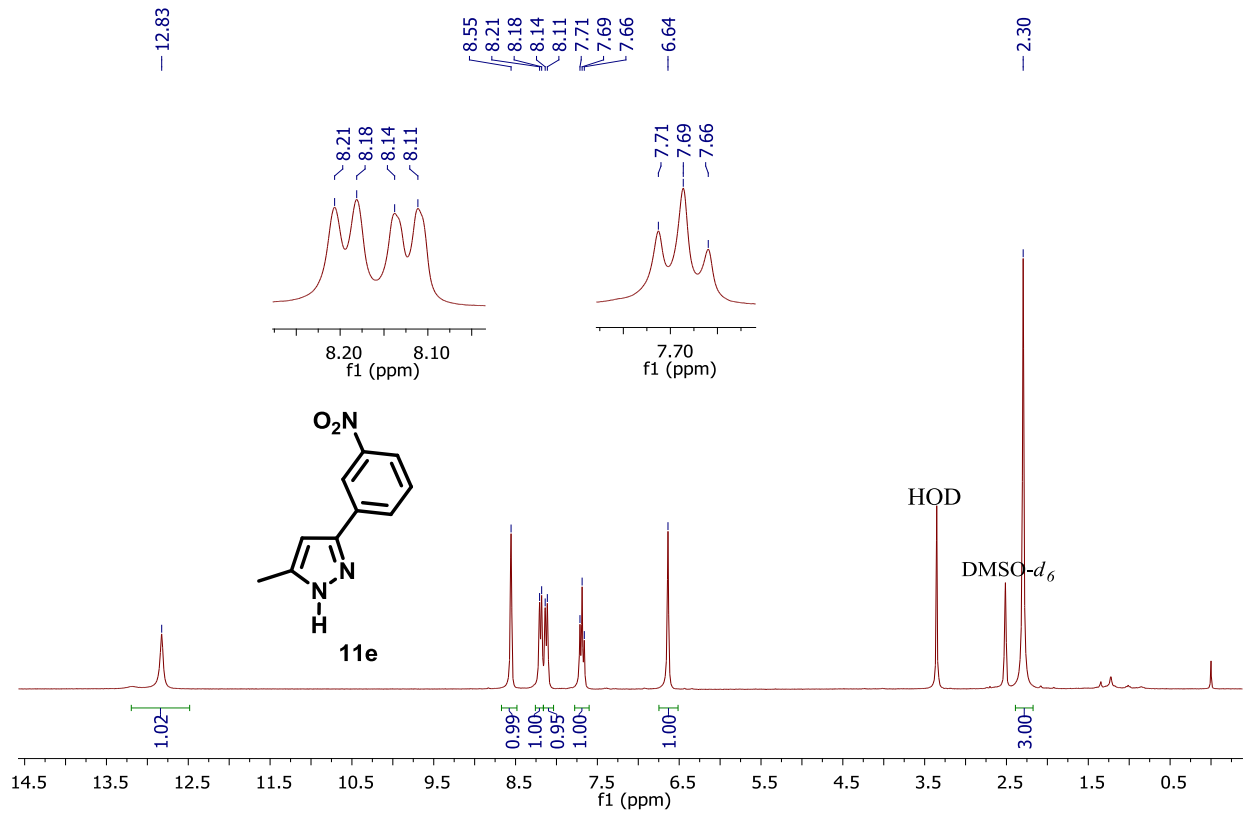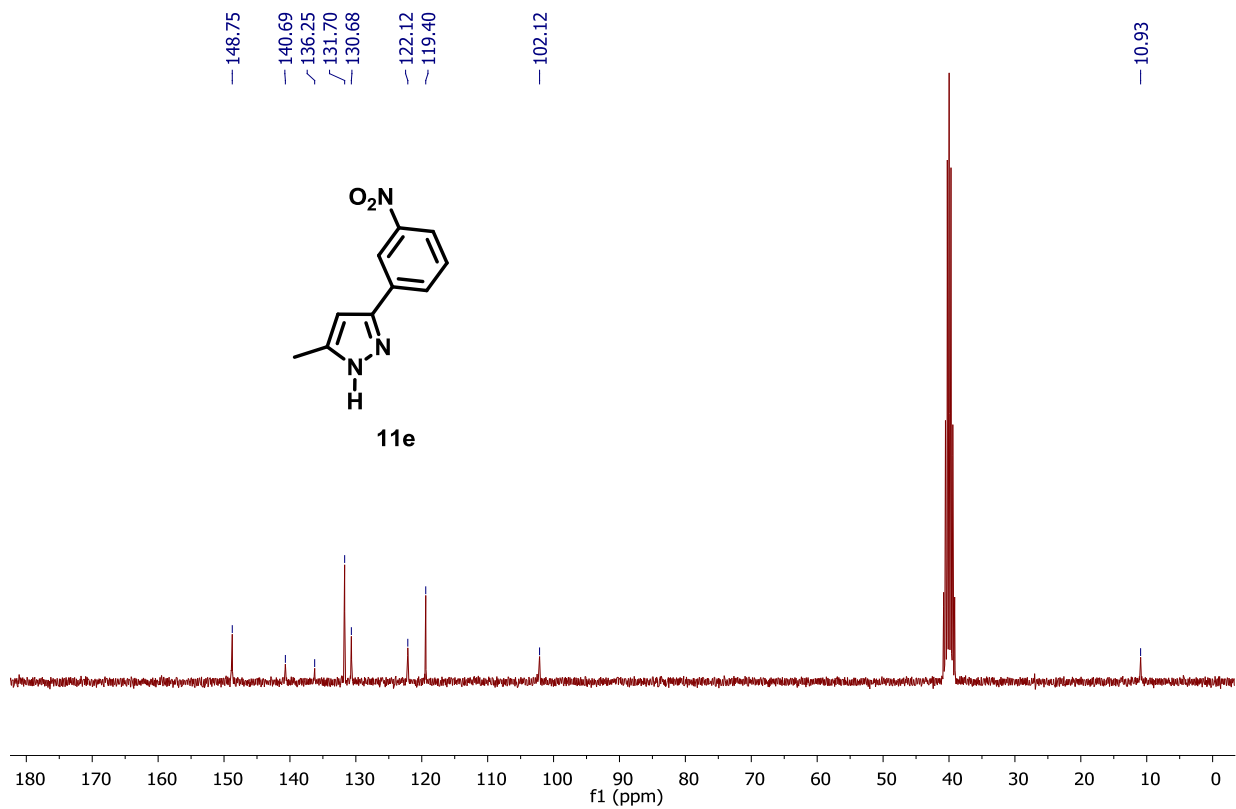

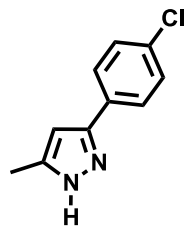

11f

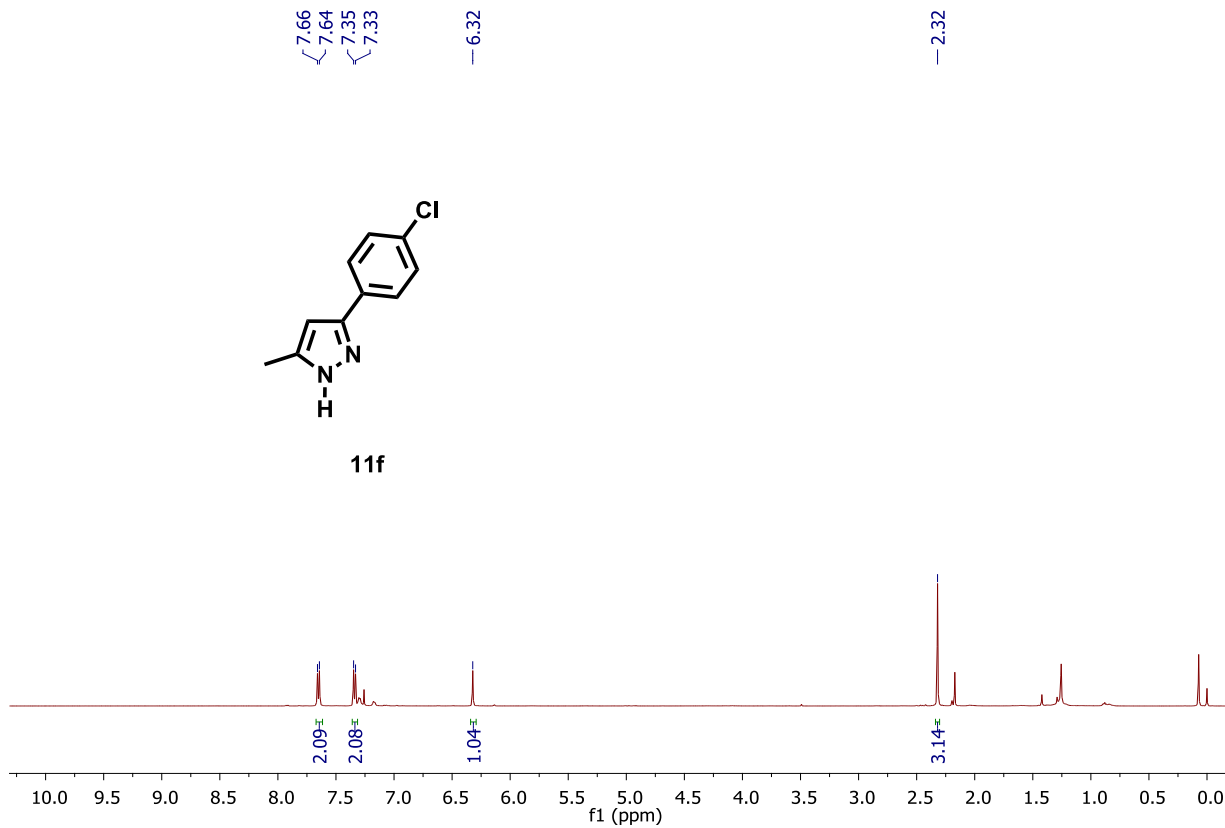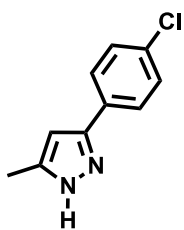

11f

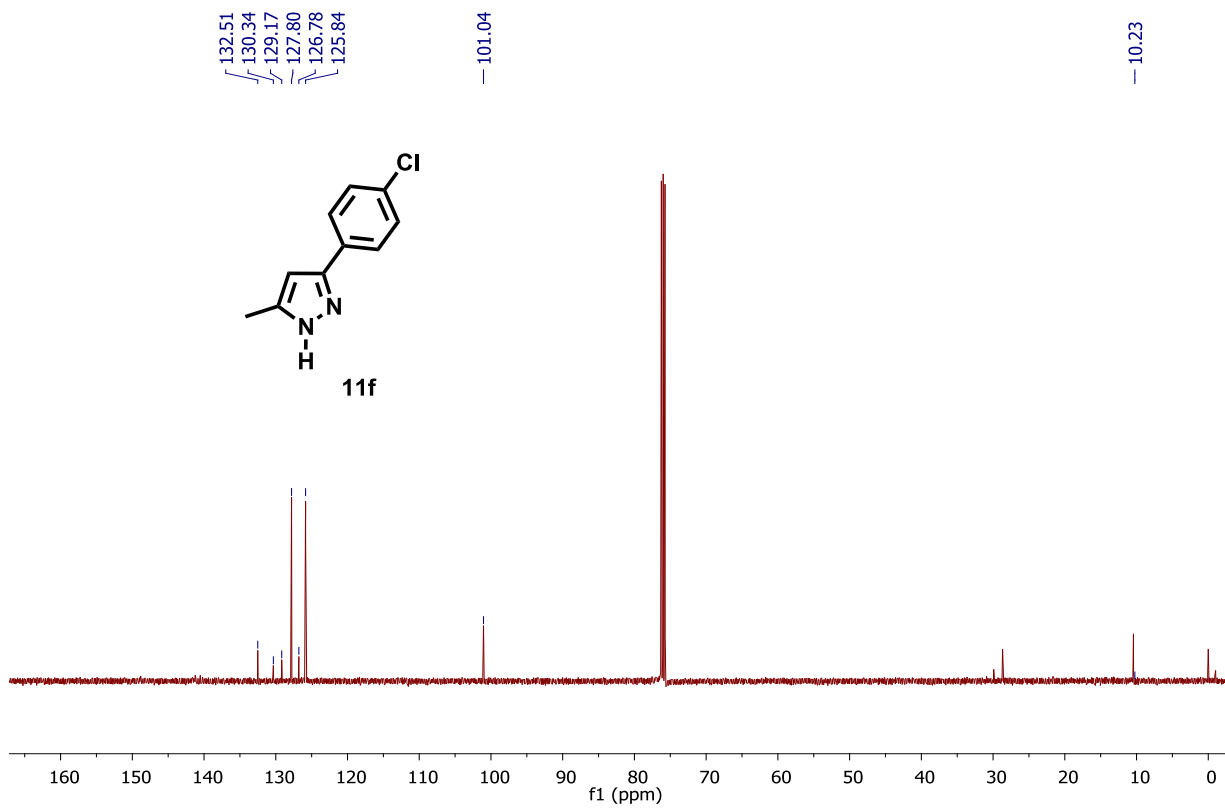

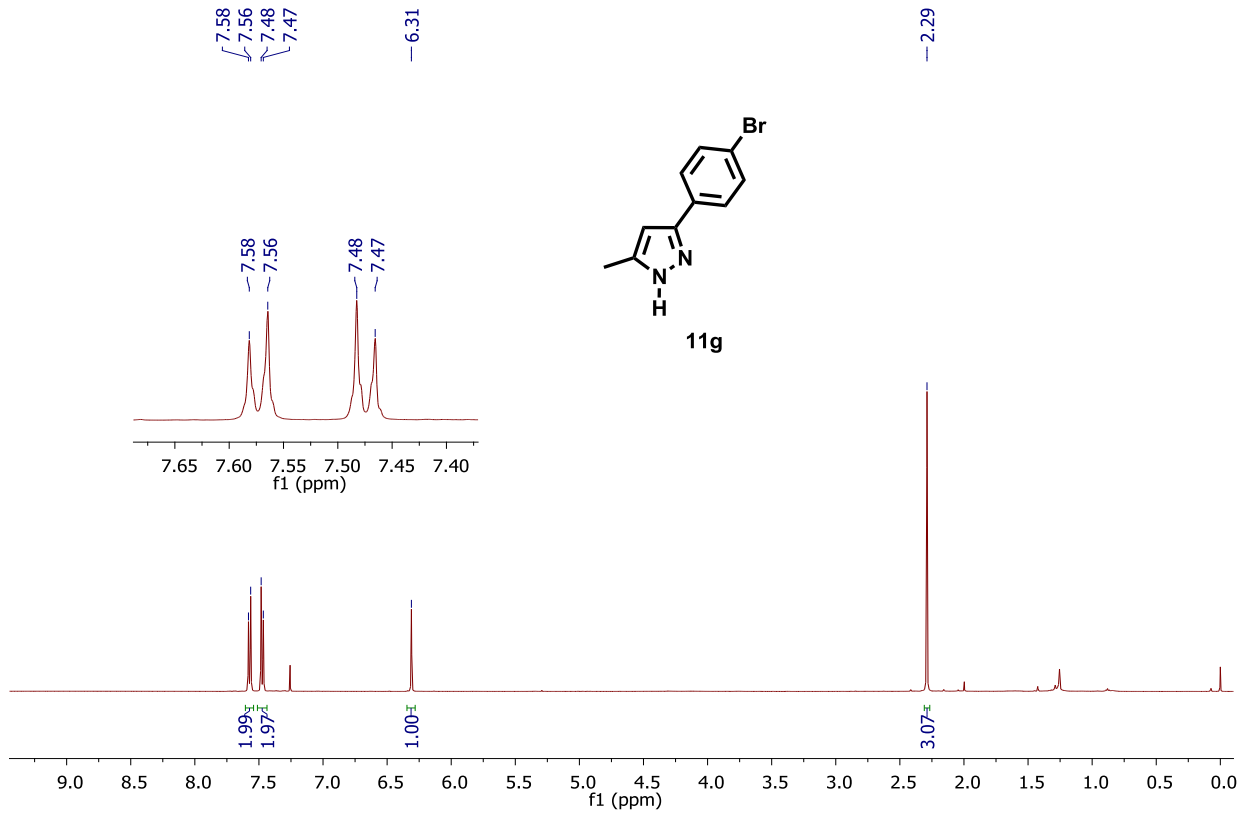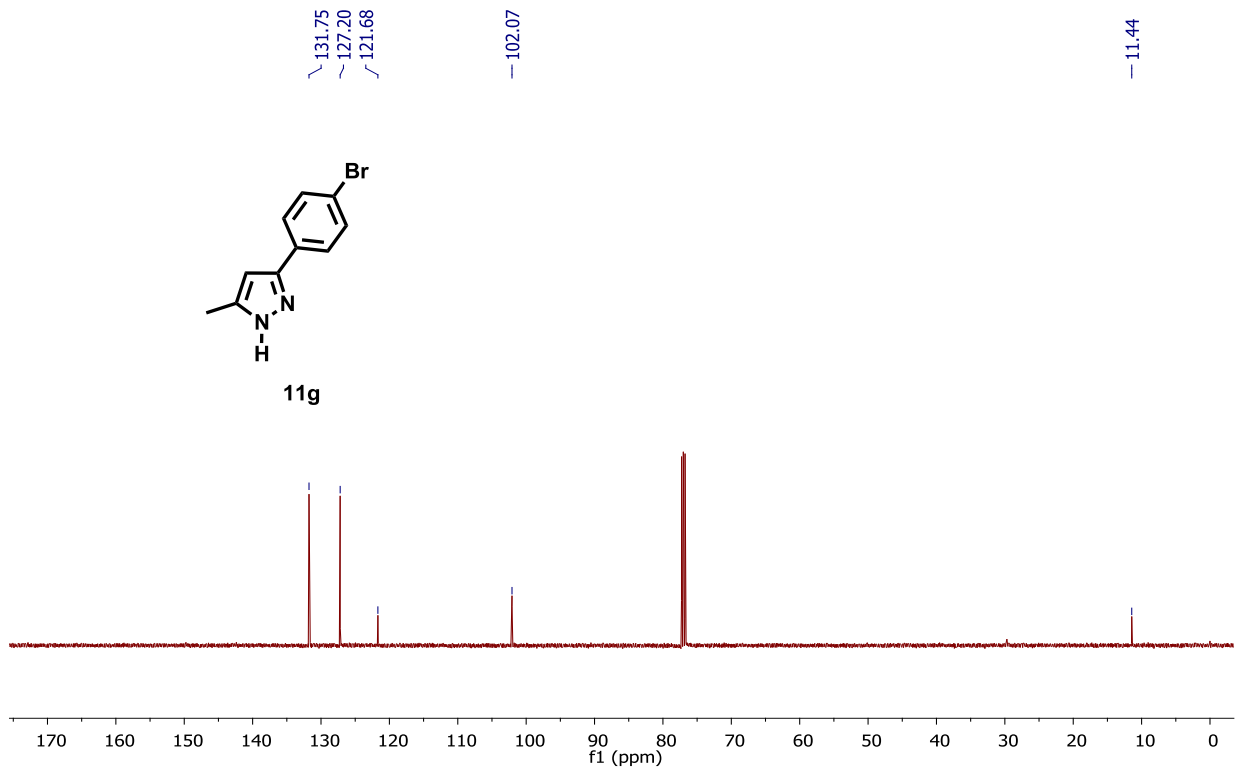

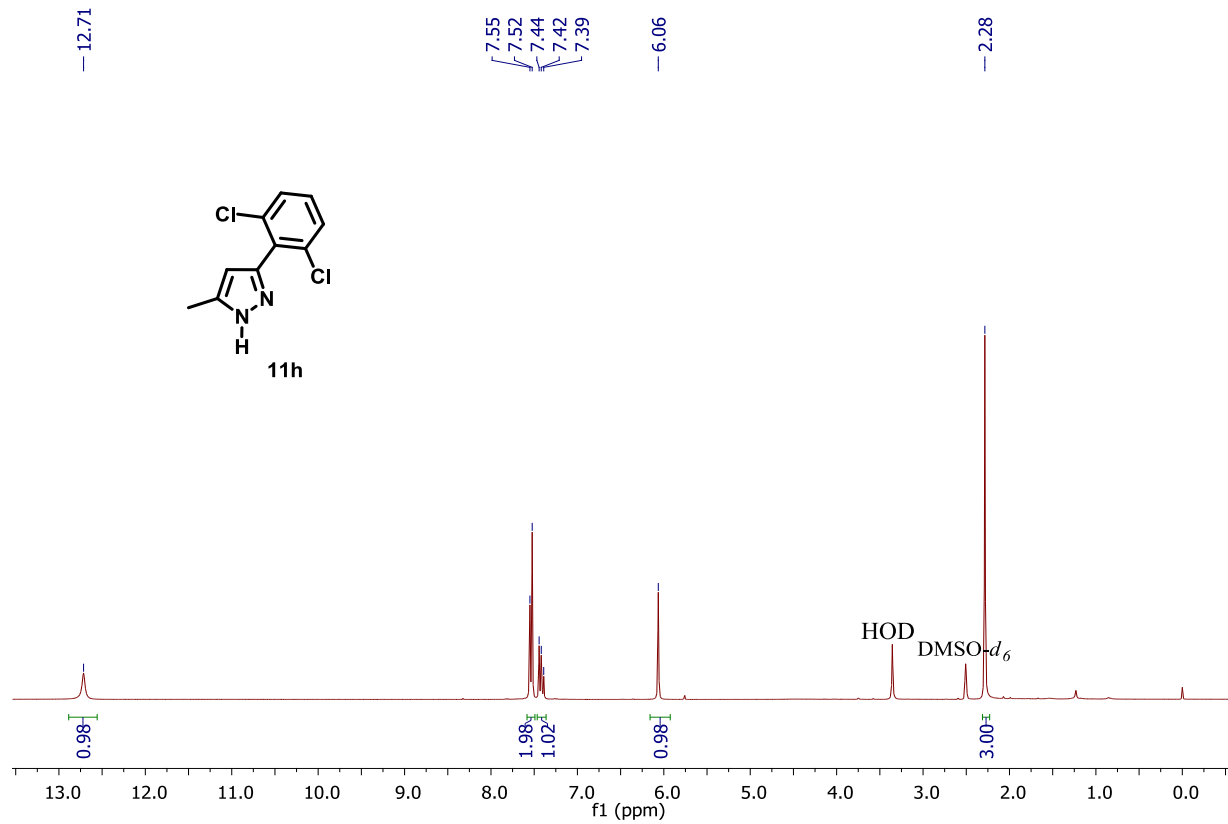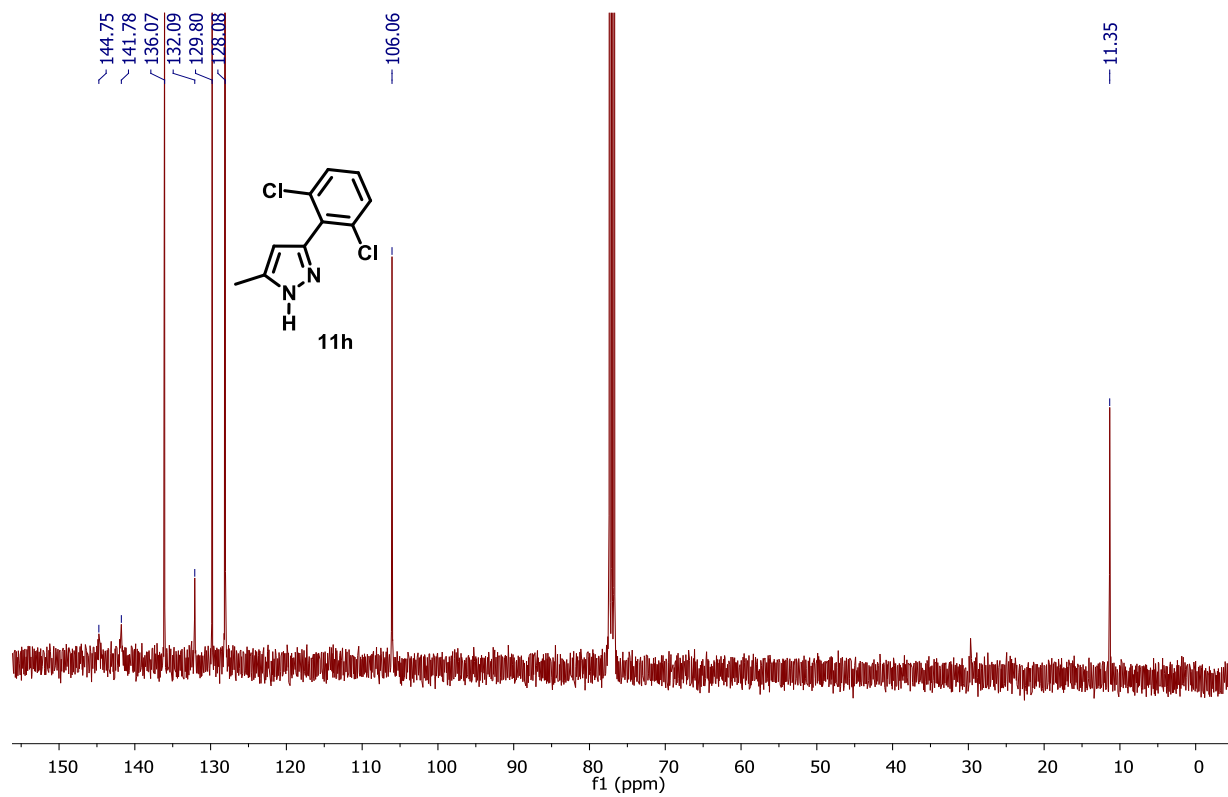

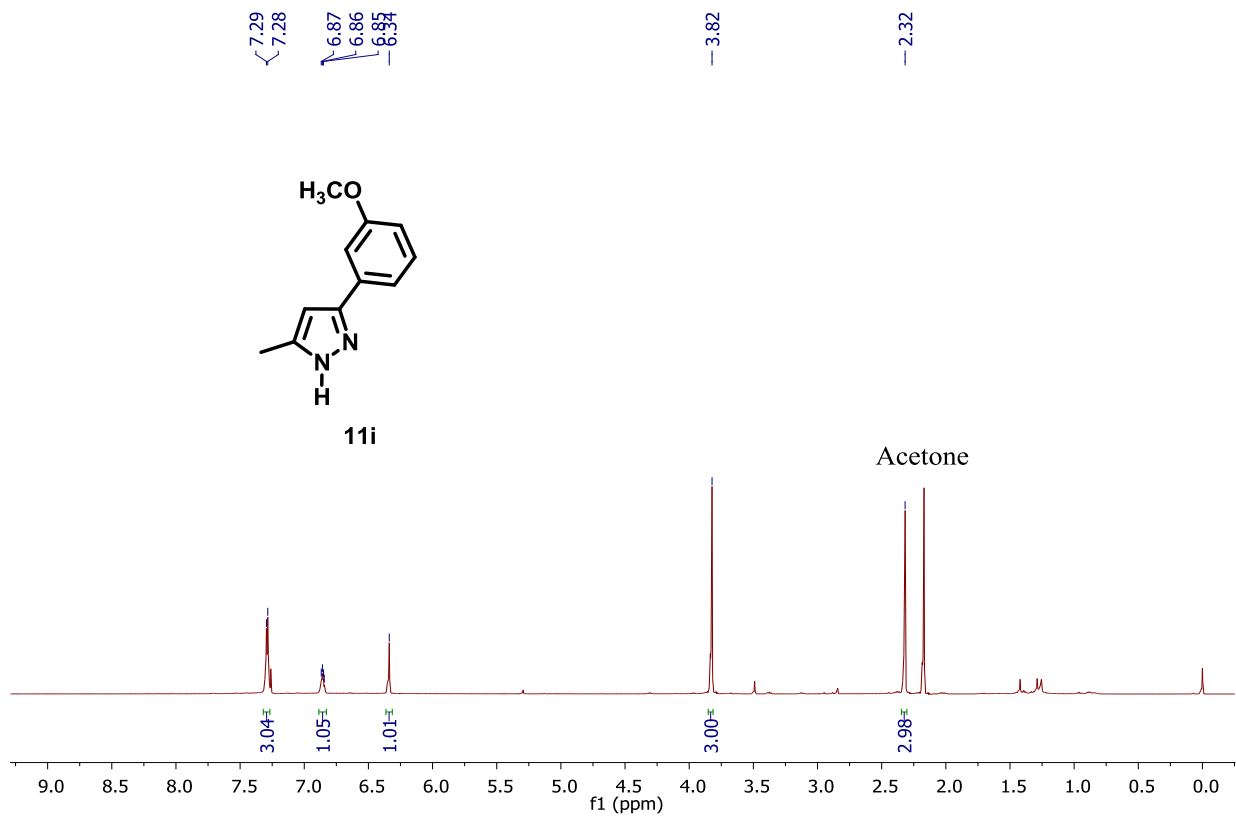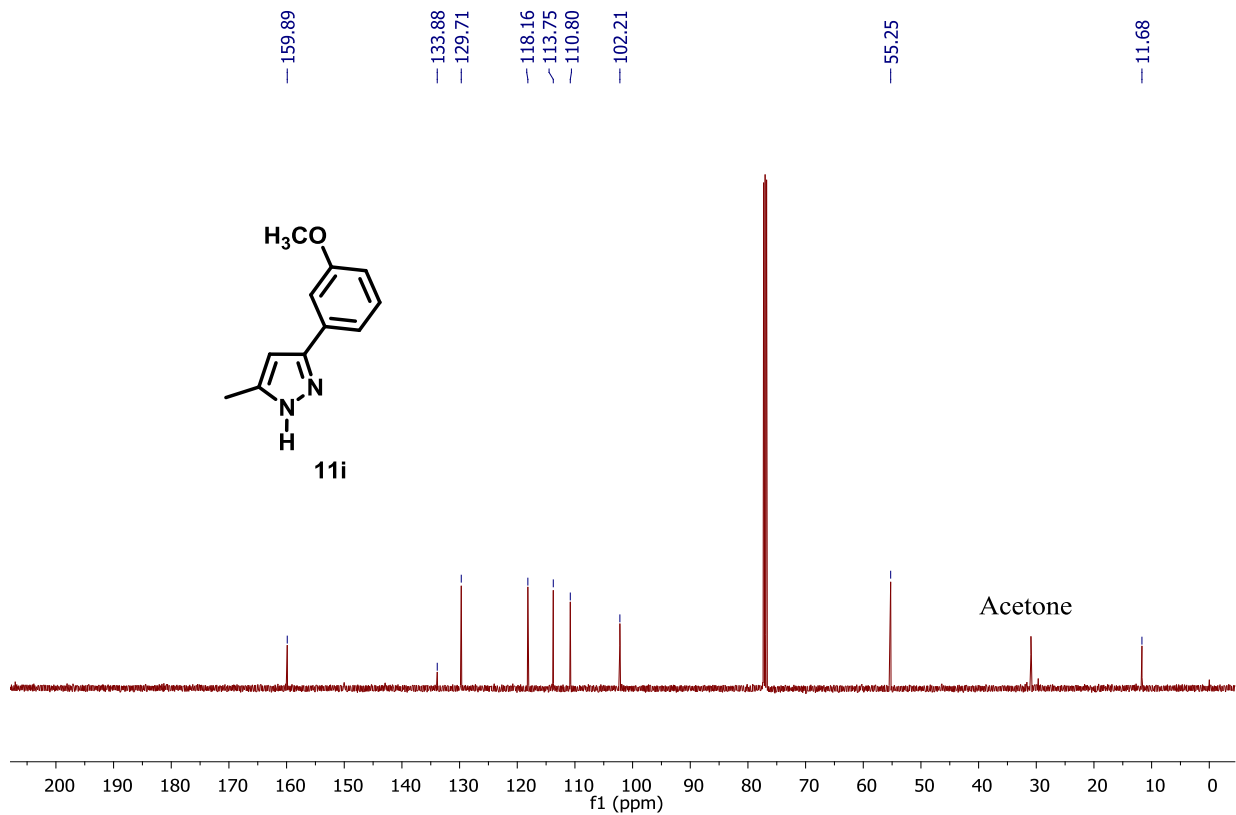

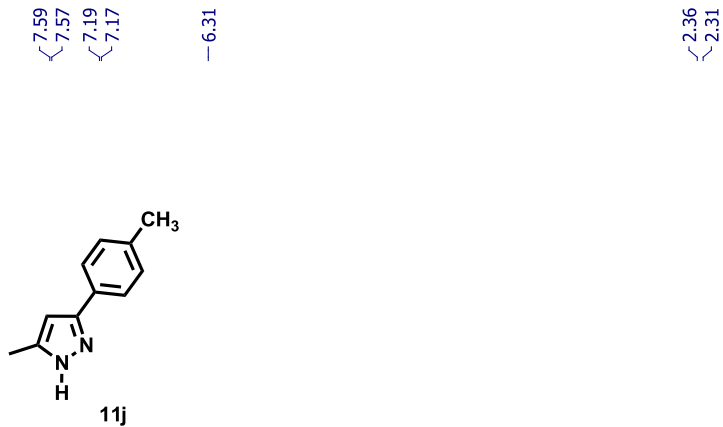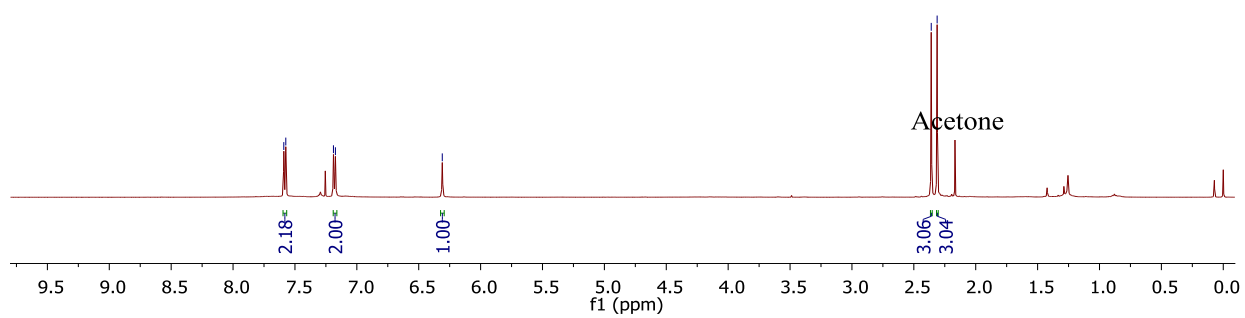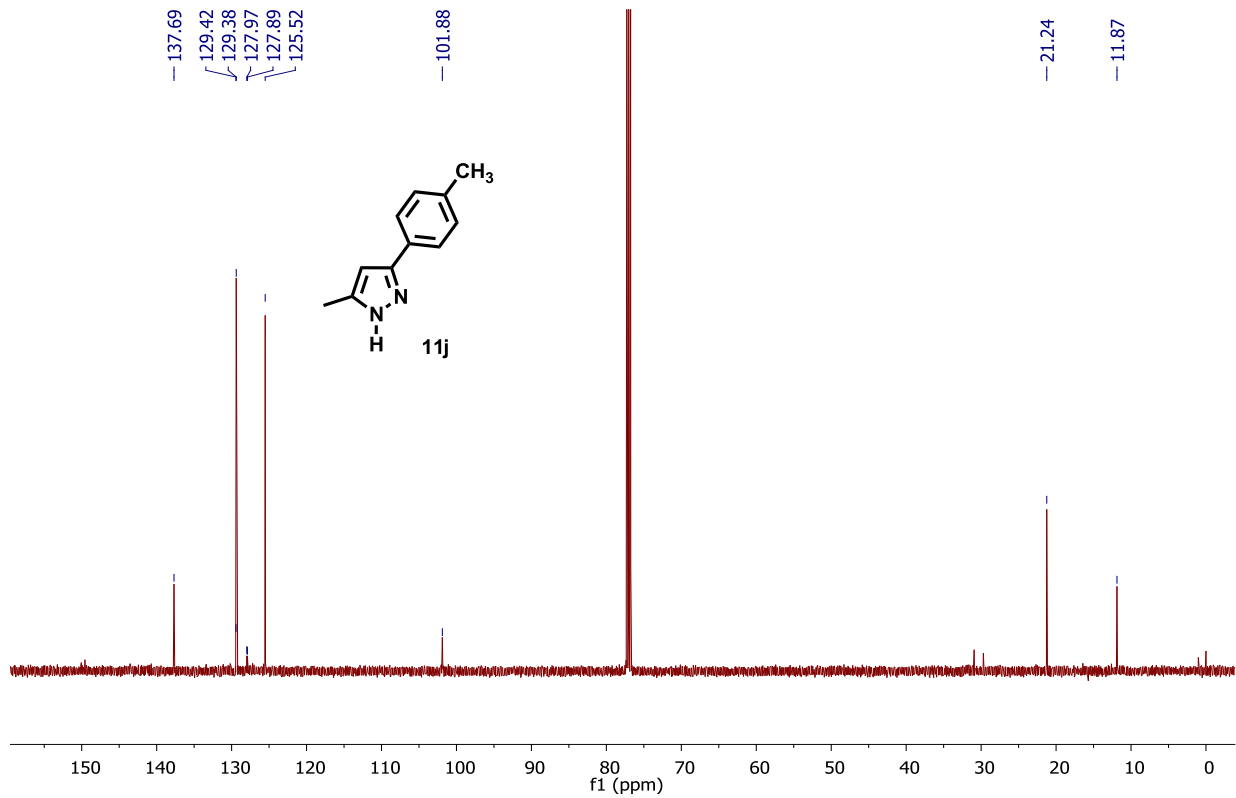



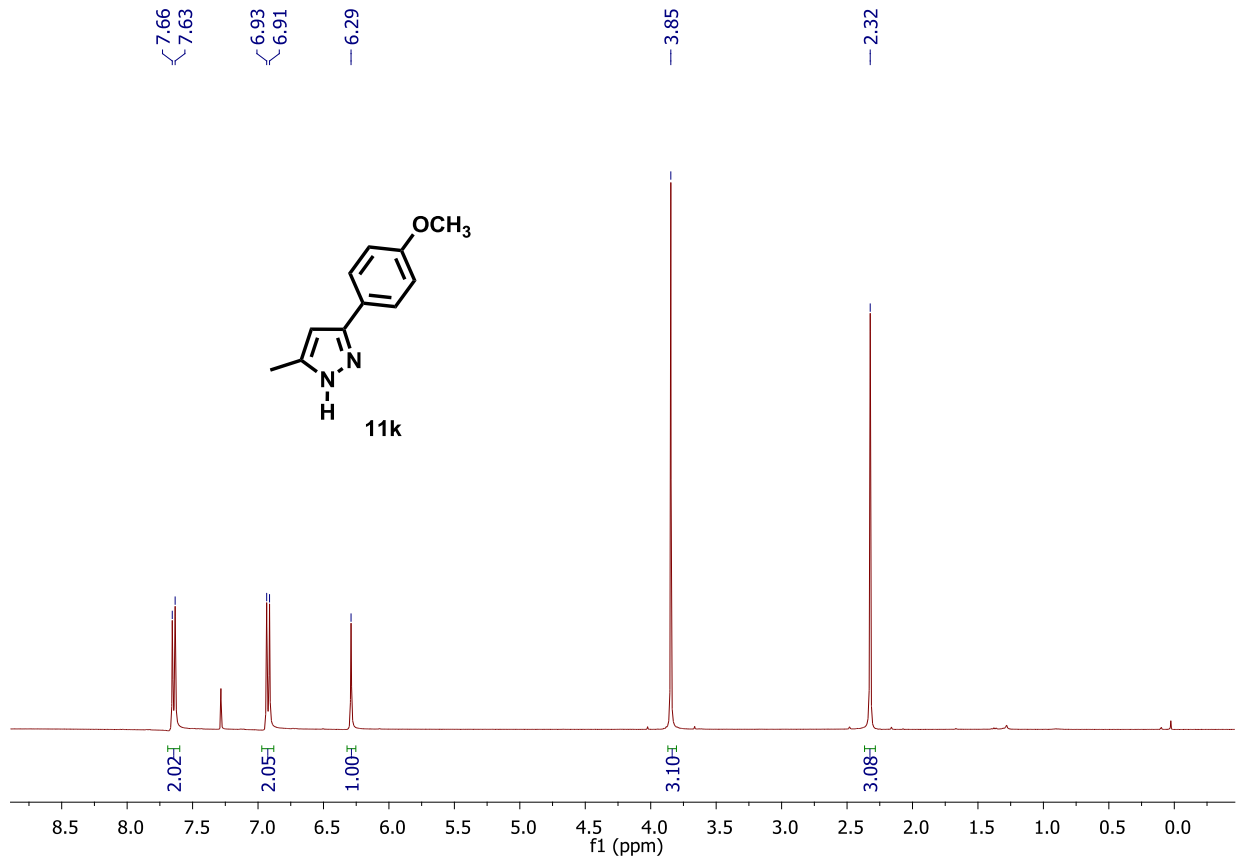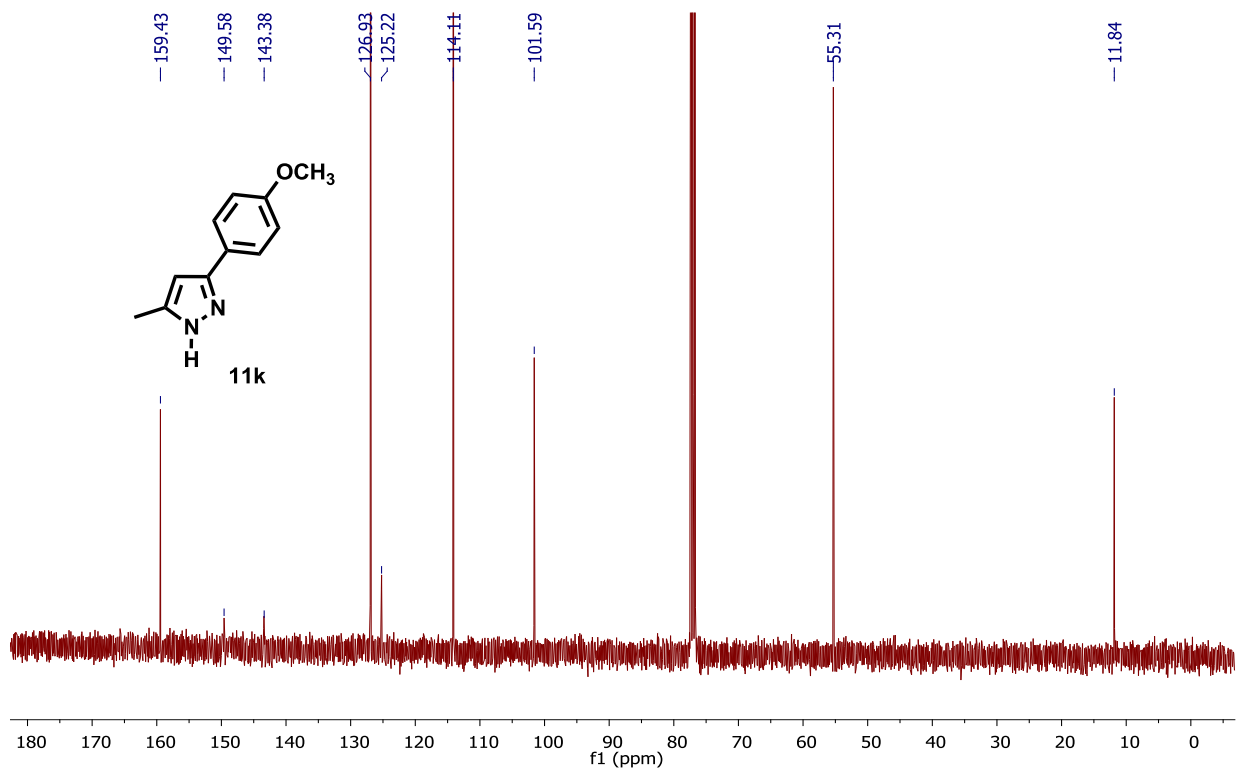

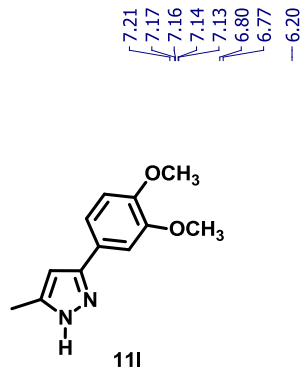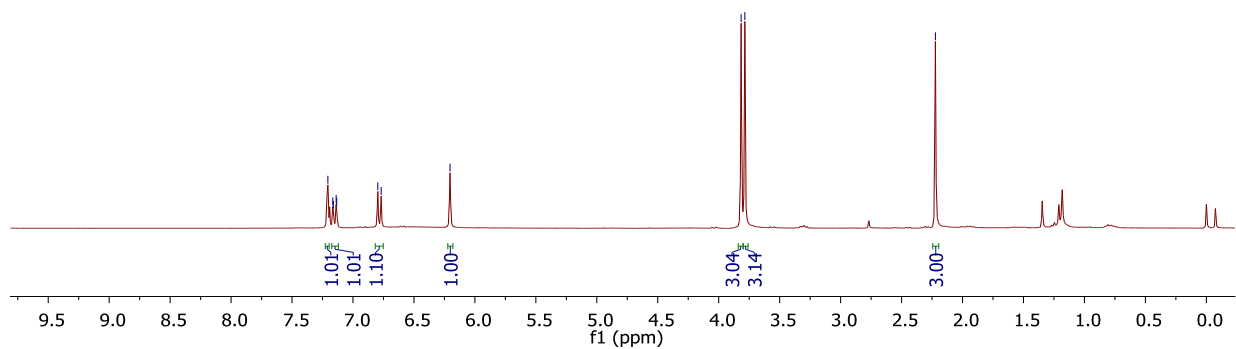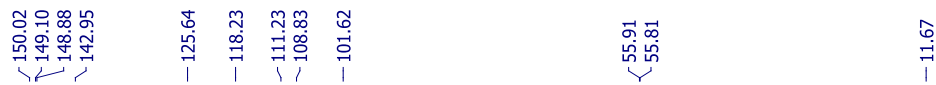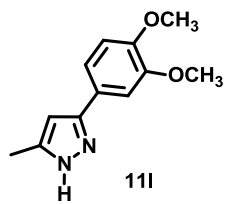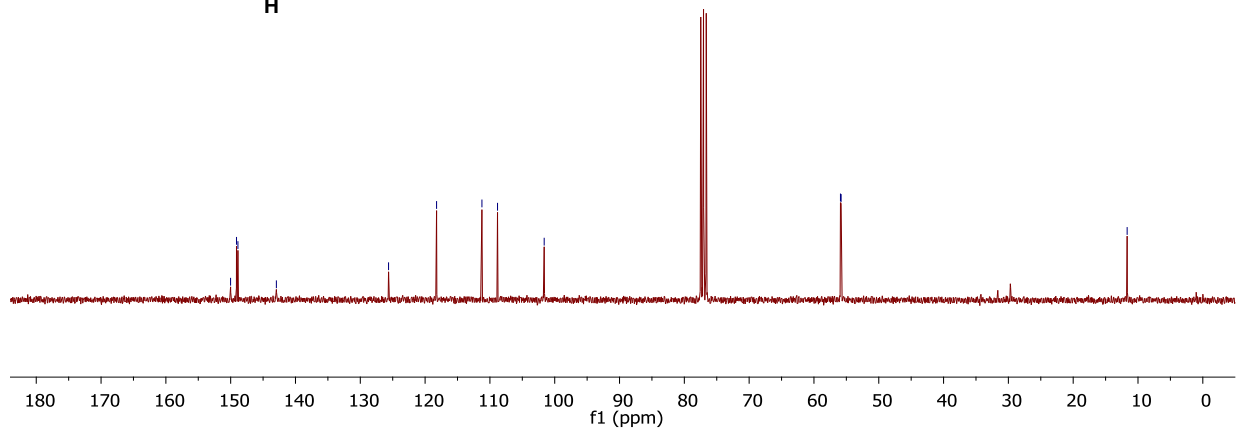

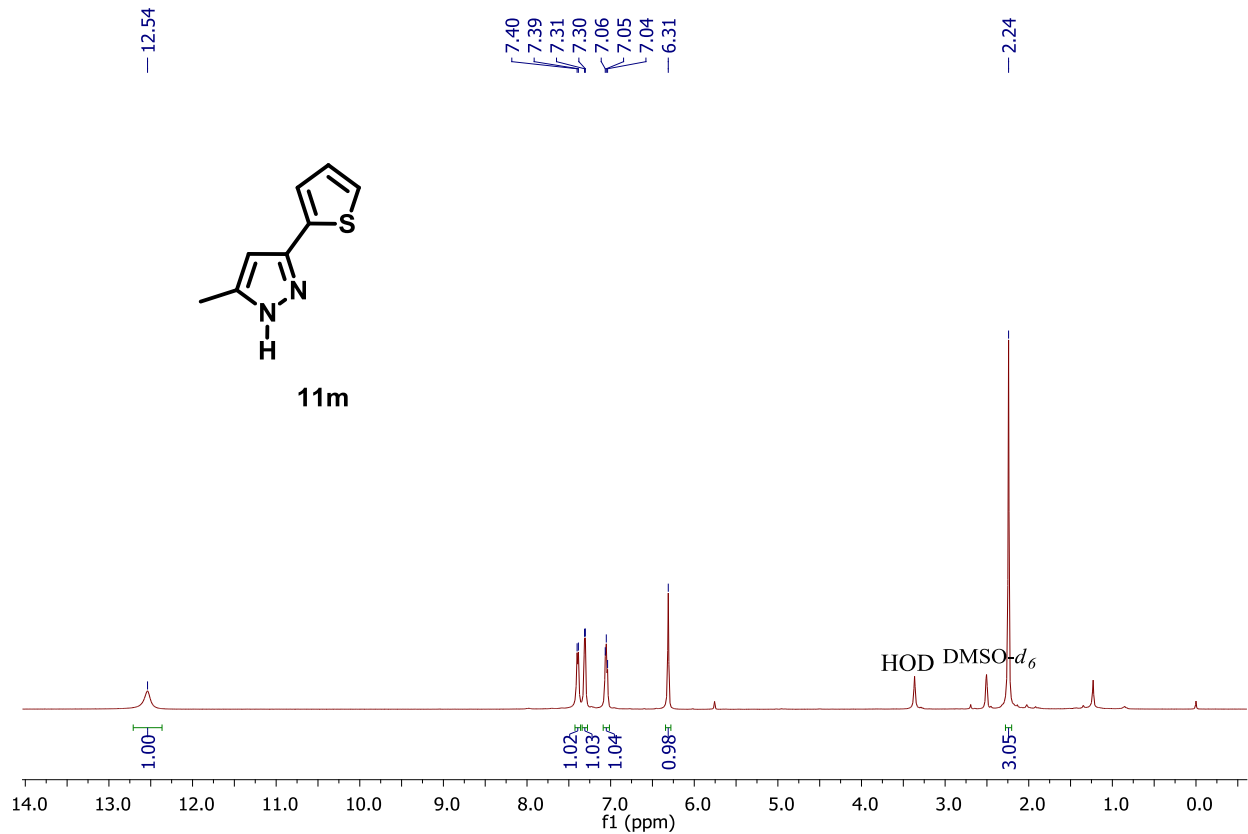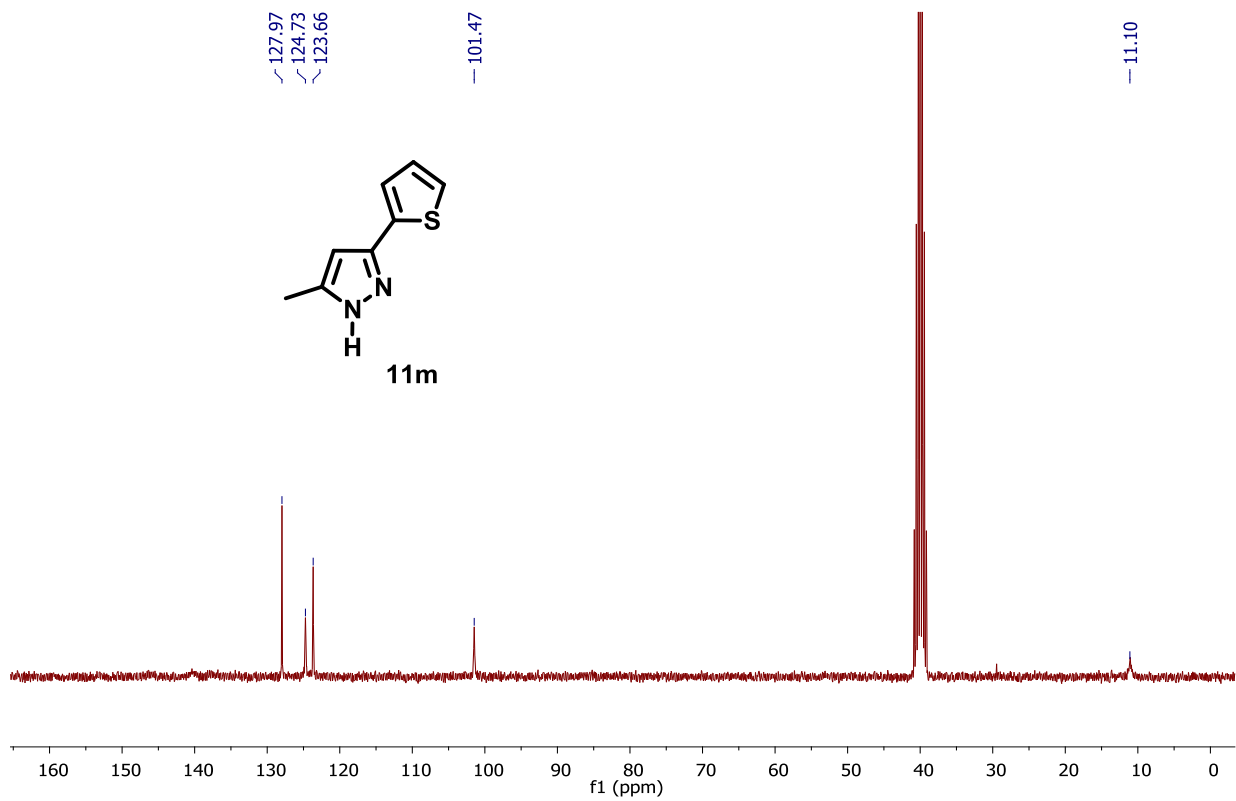

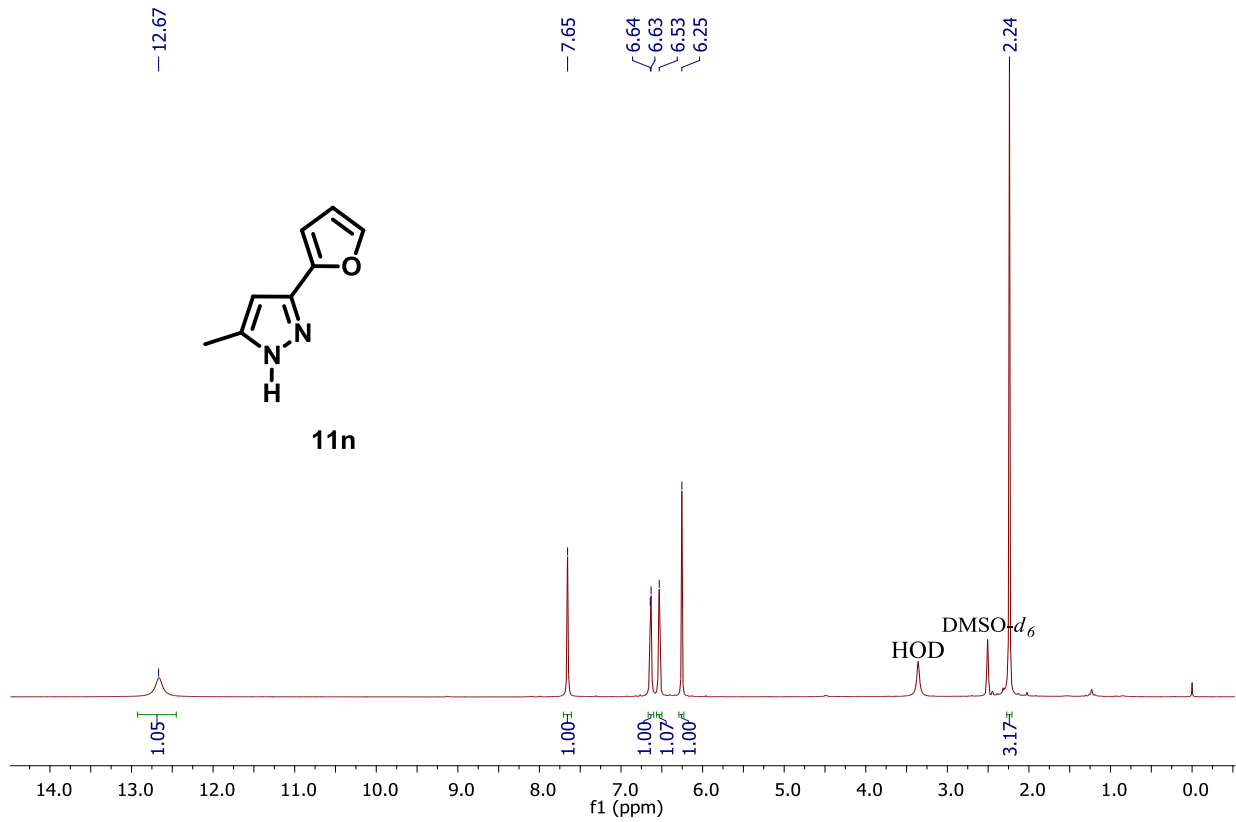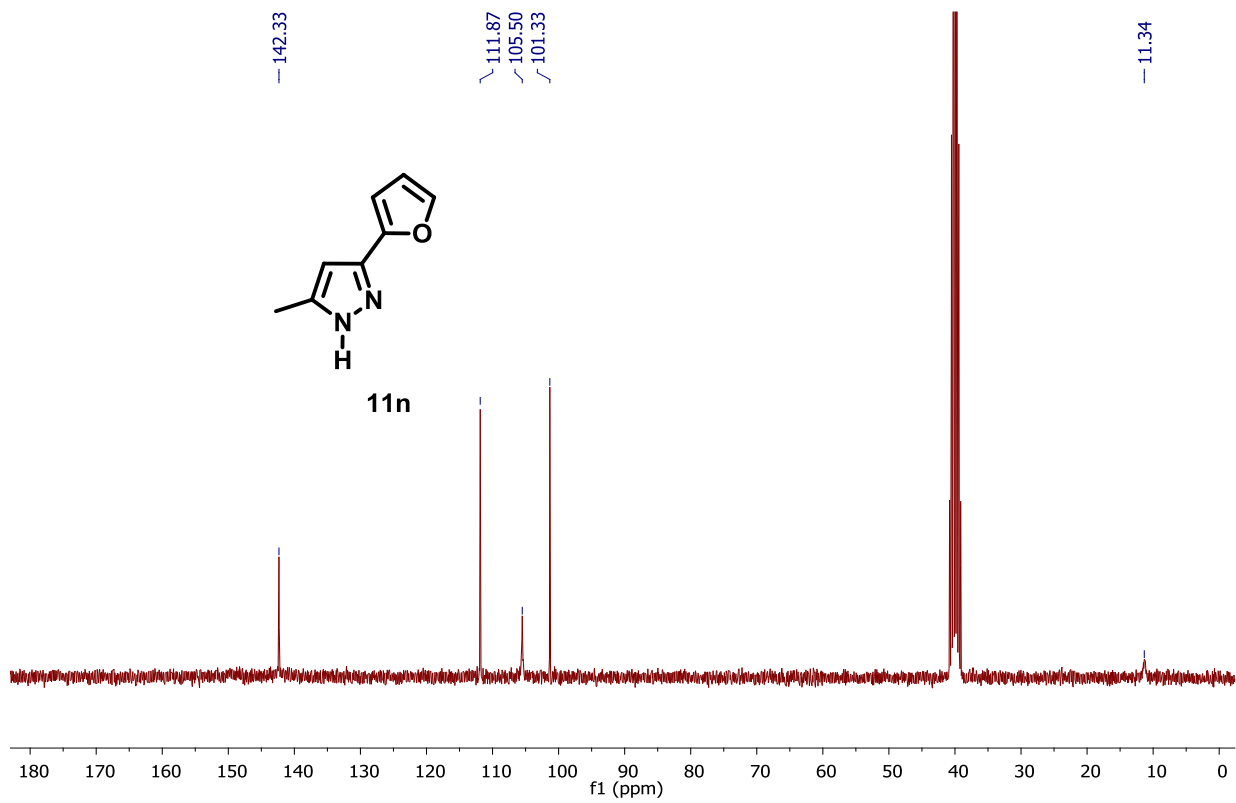

— 12.88

7.82  
7.79  
7.43  
7.41  
7.38  
7.32  
7.29  
7.27  
6.71  
6.70

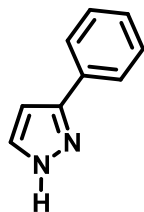

11o

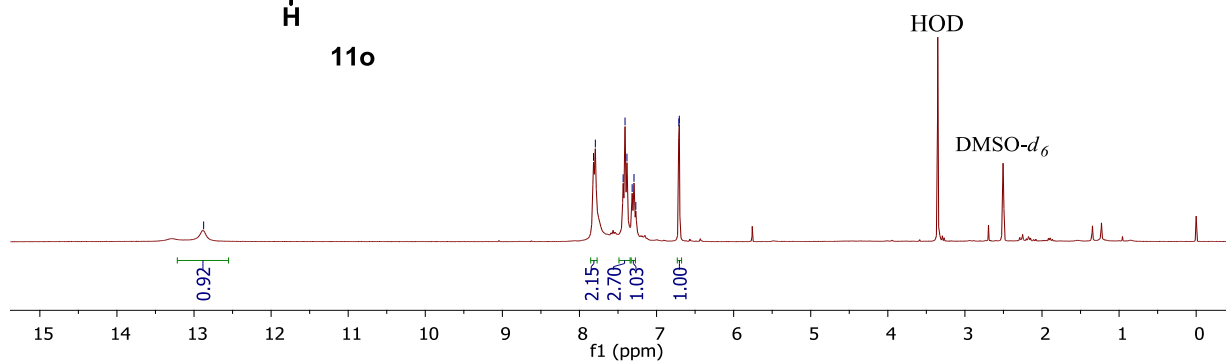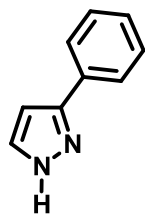

11o

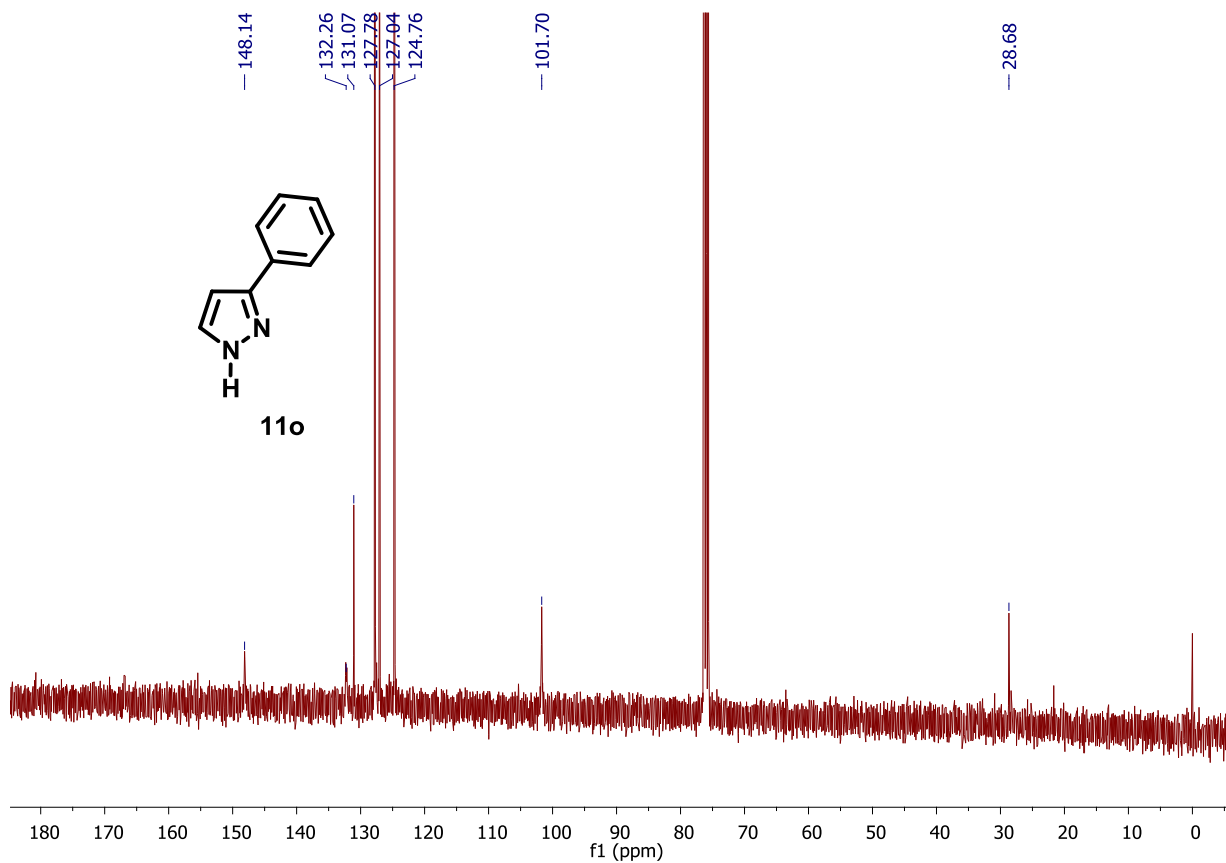

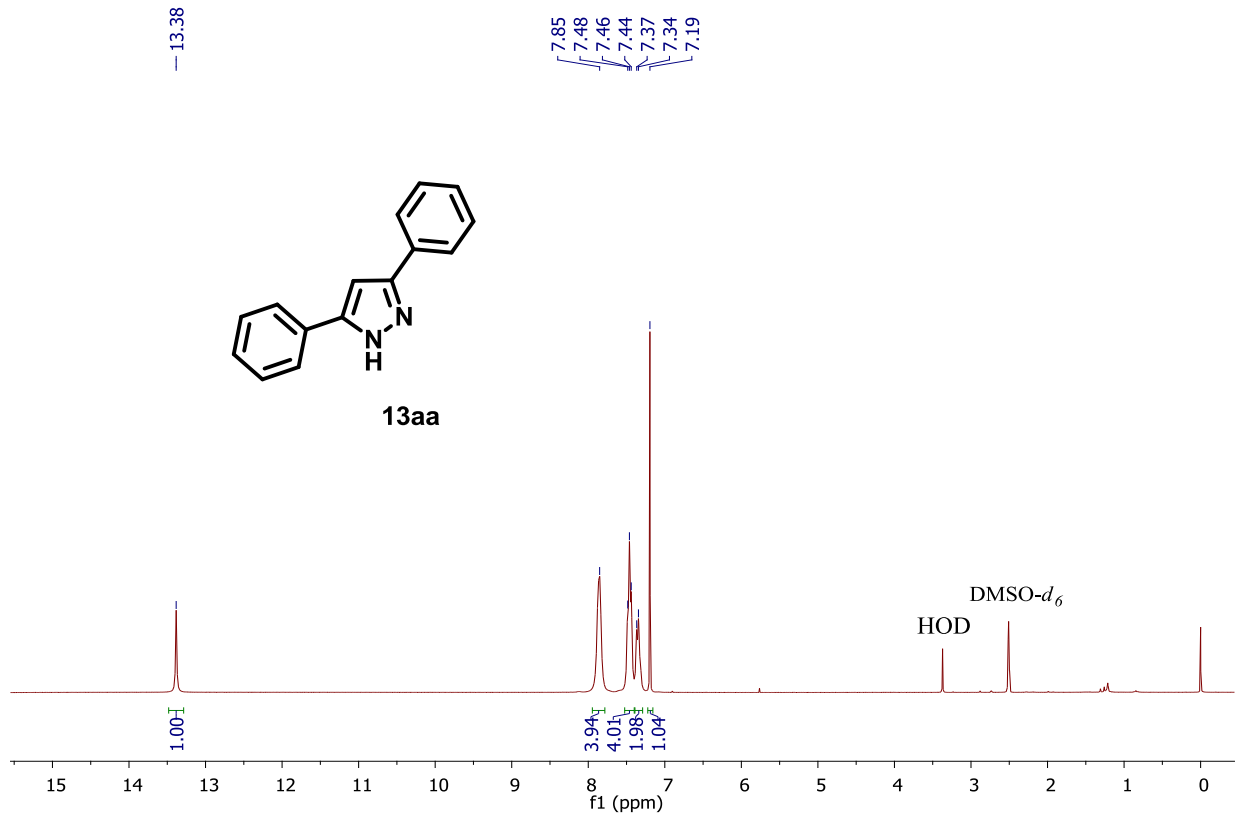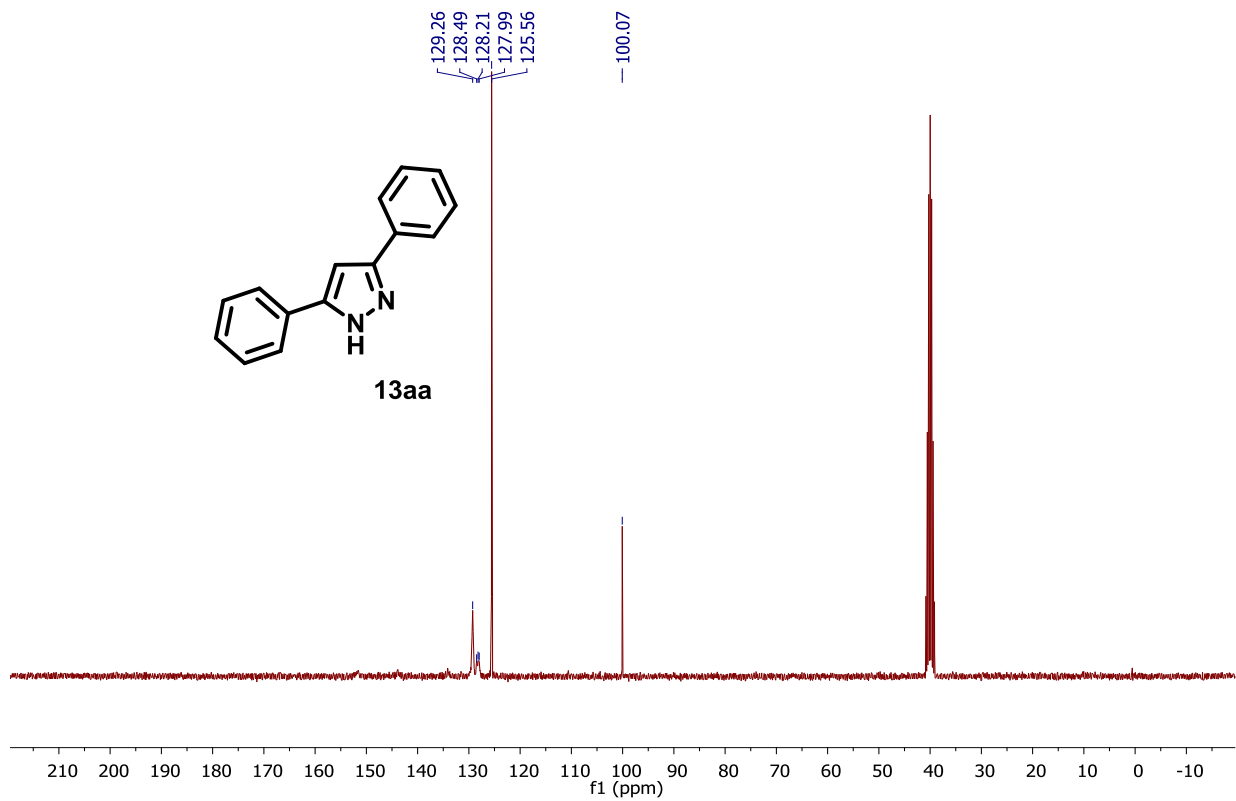

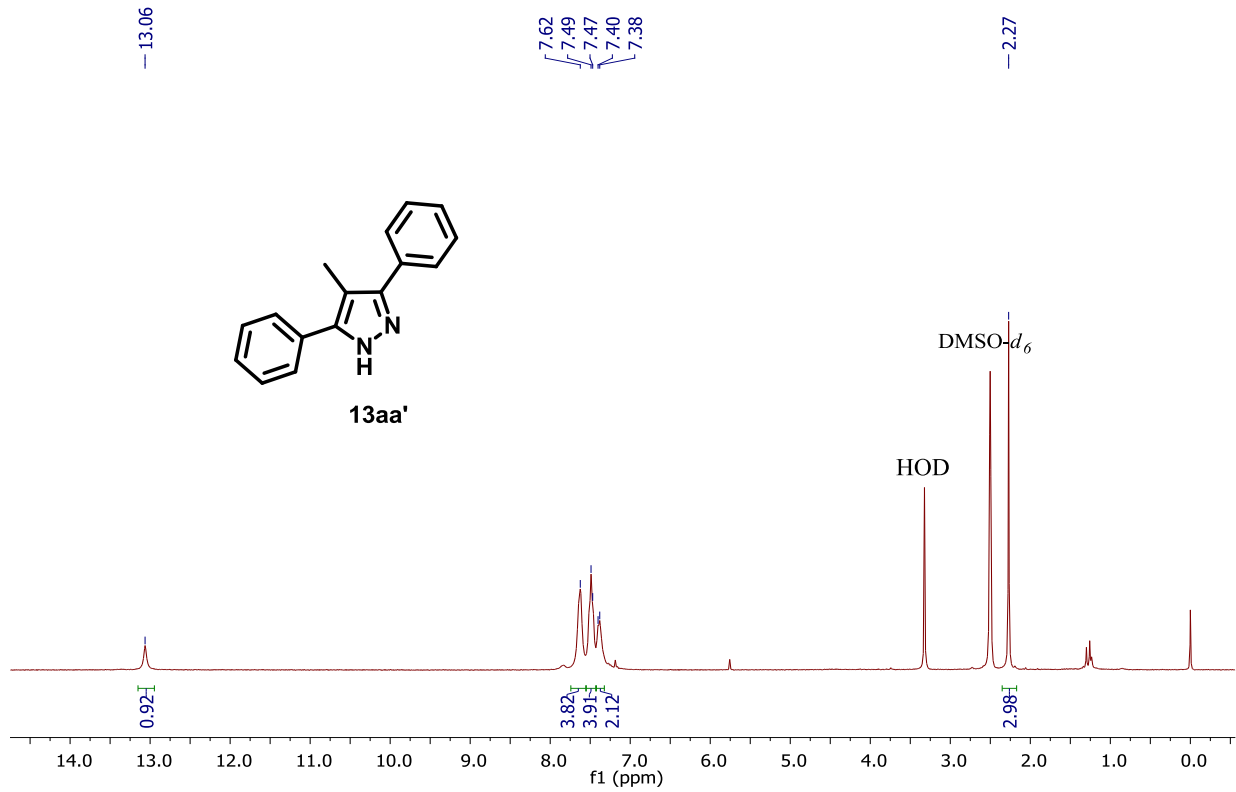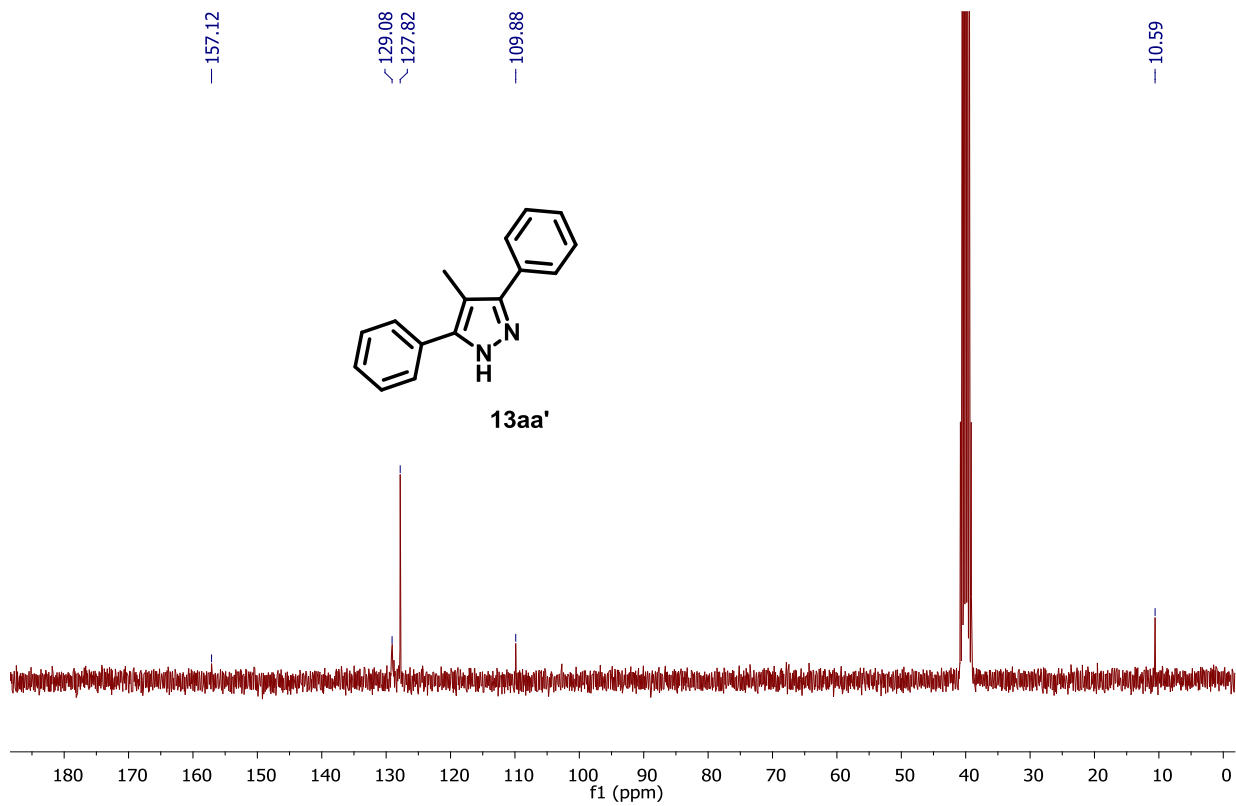

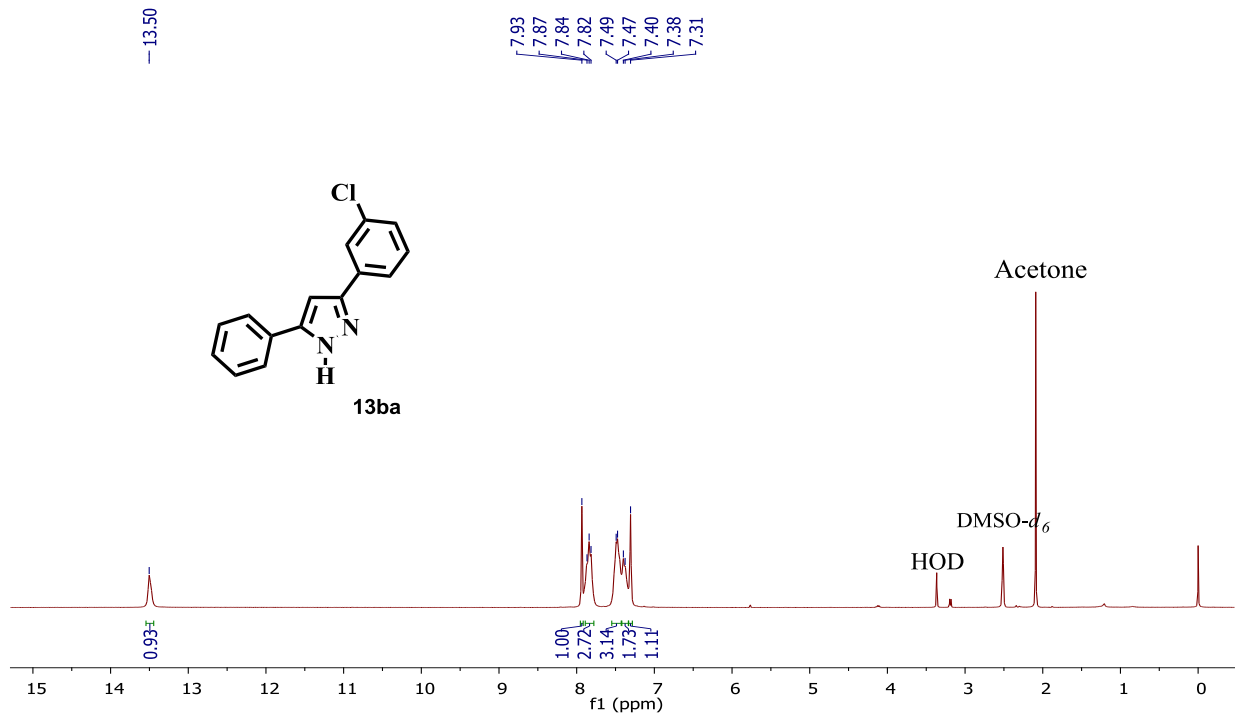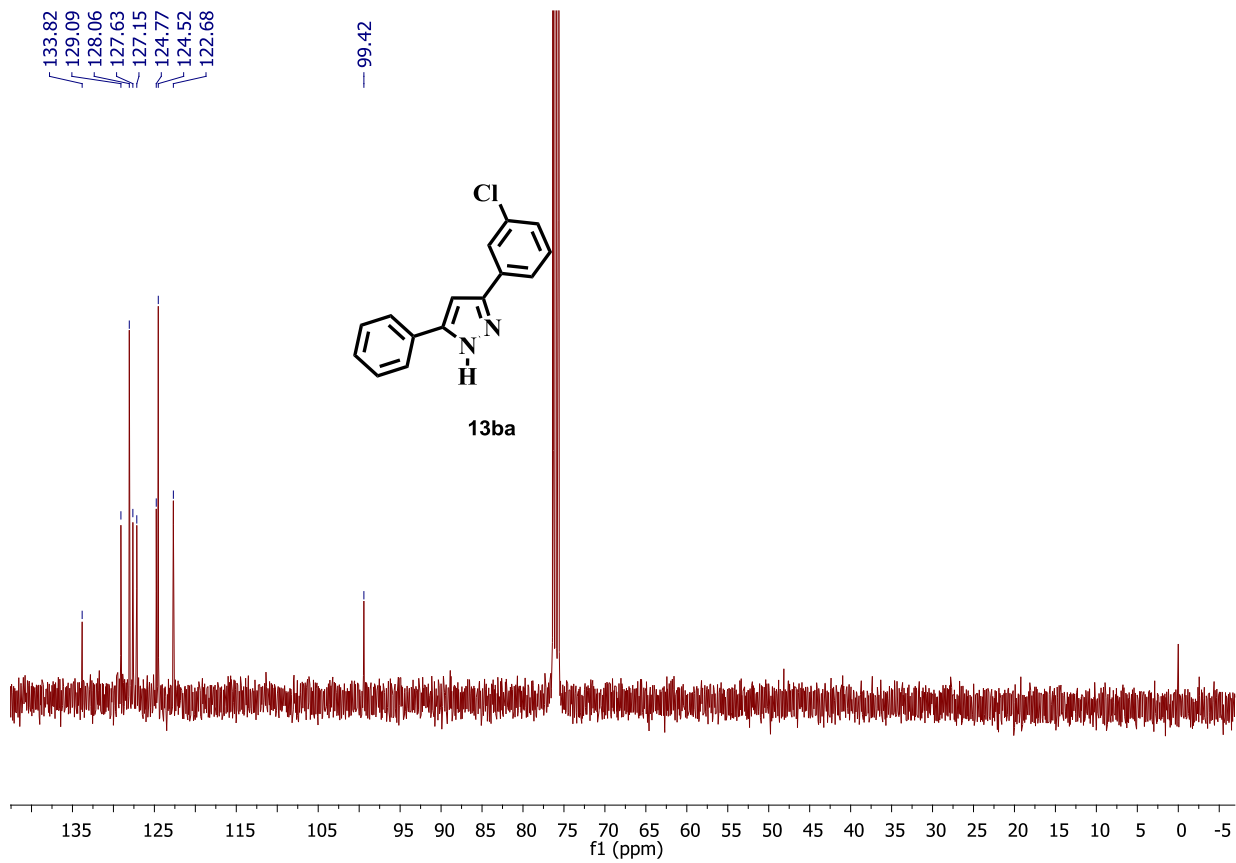



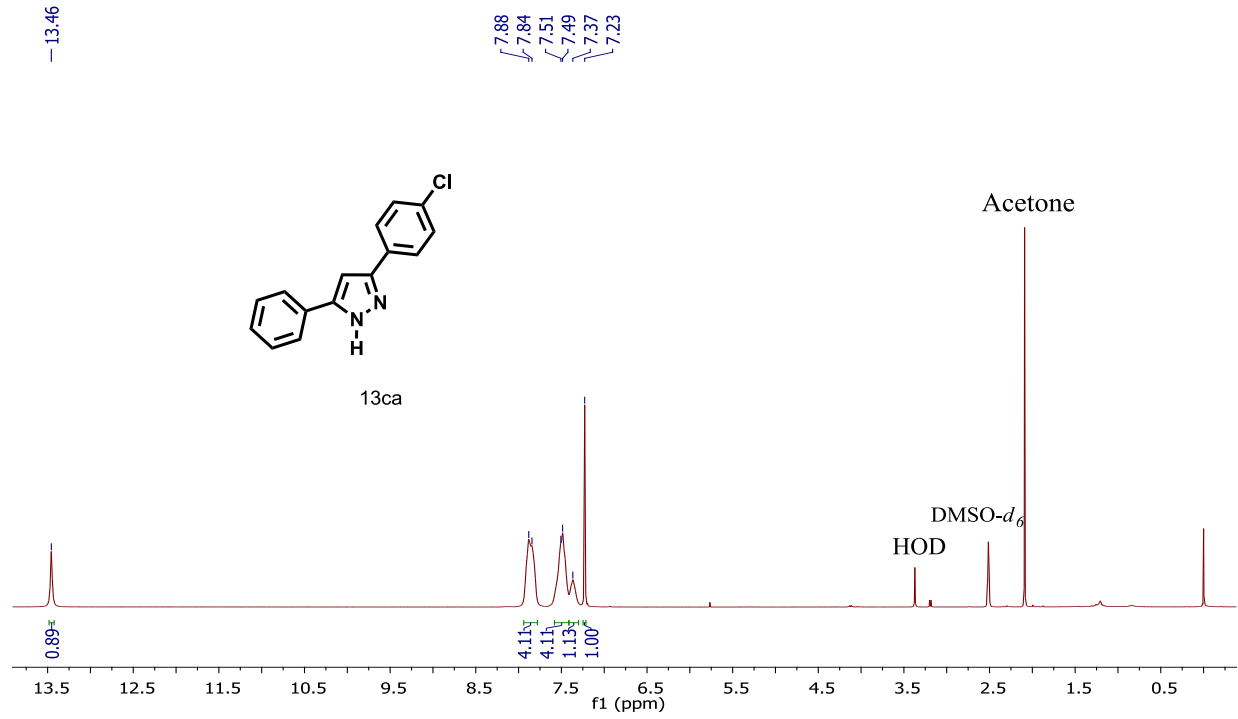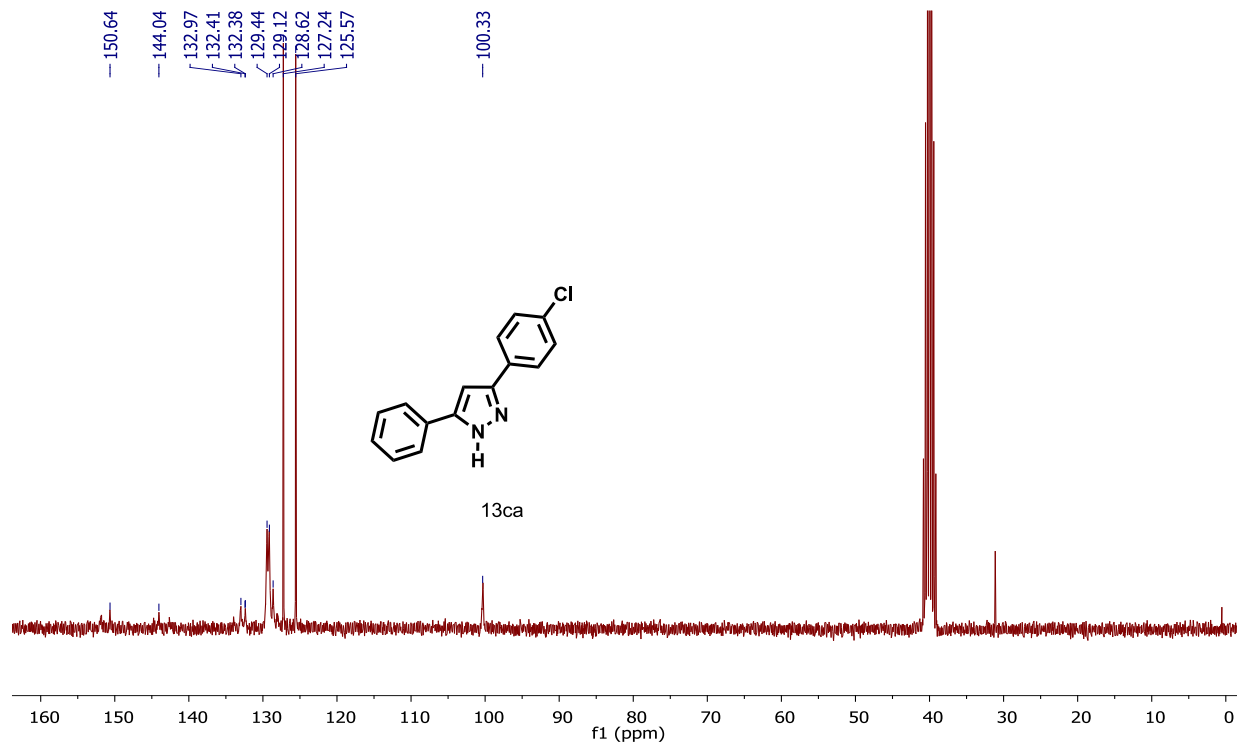

-13.47

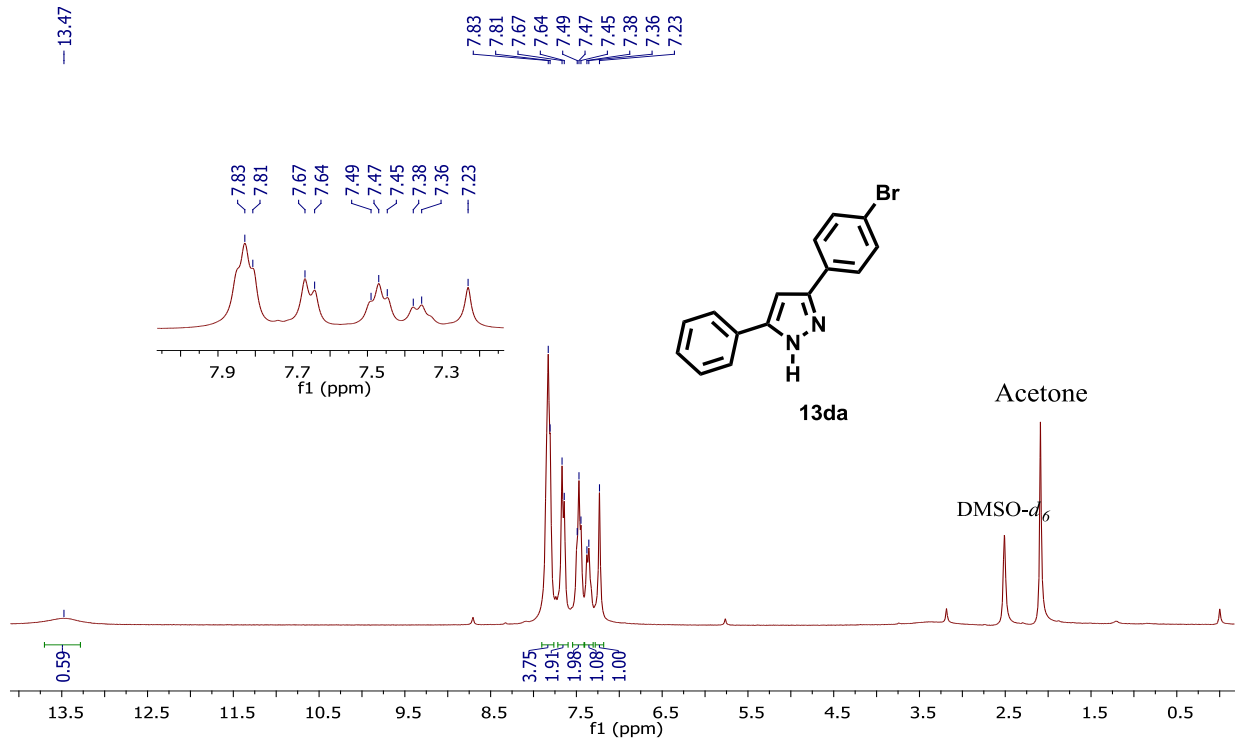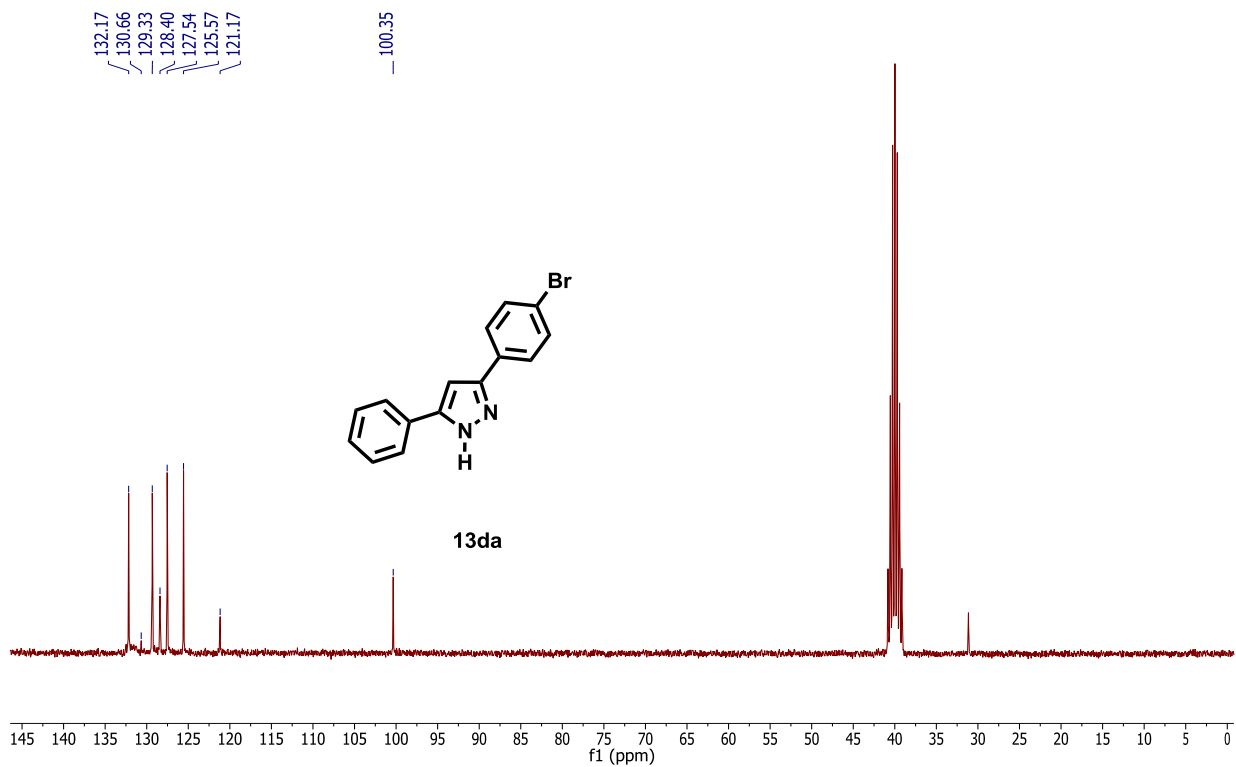

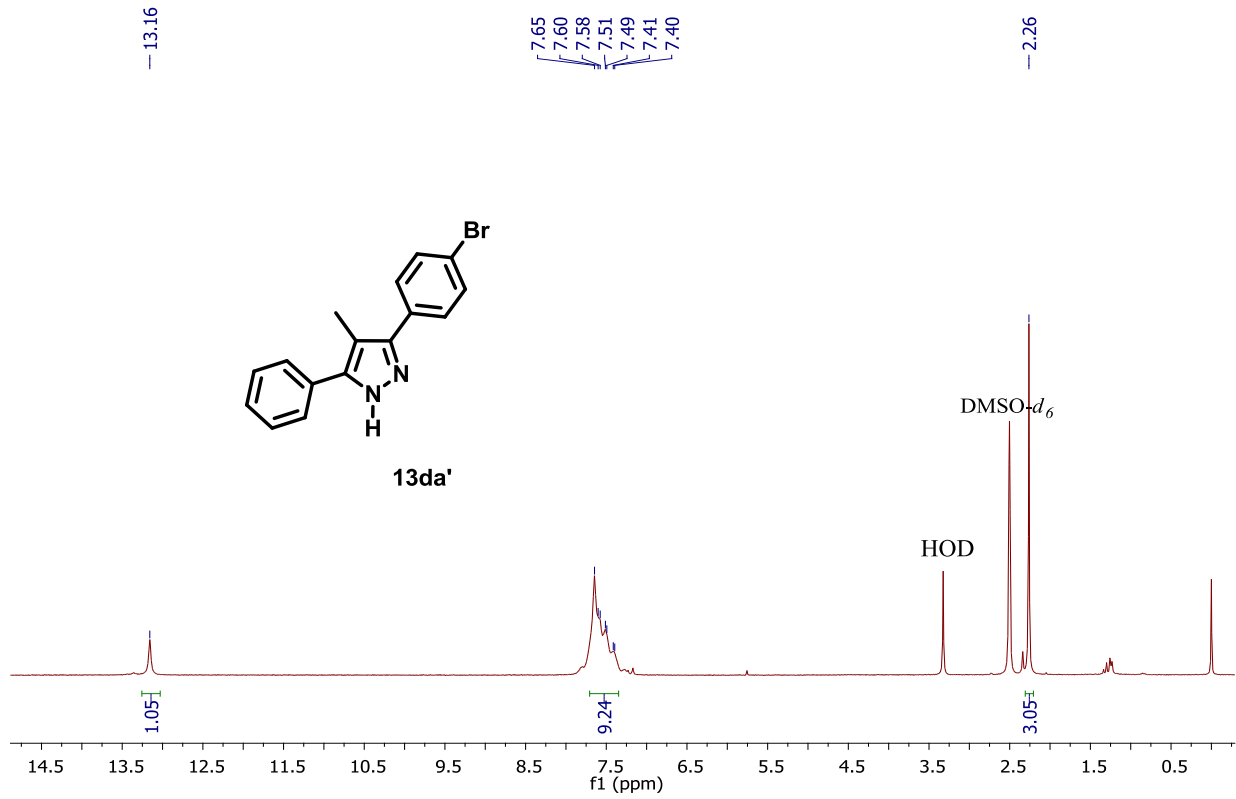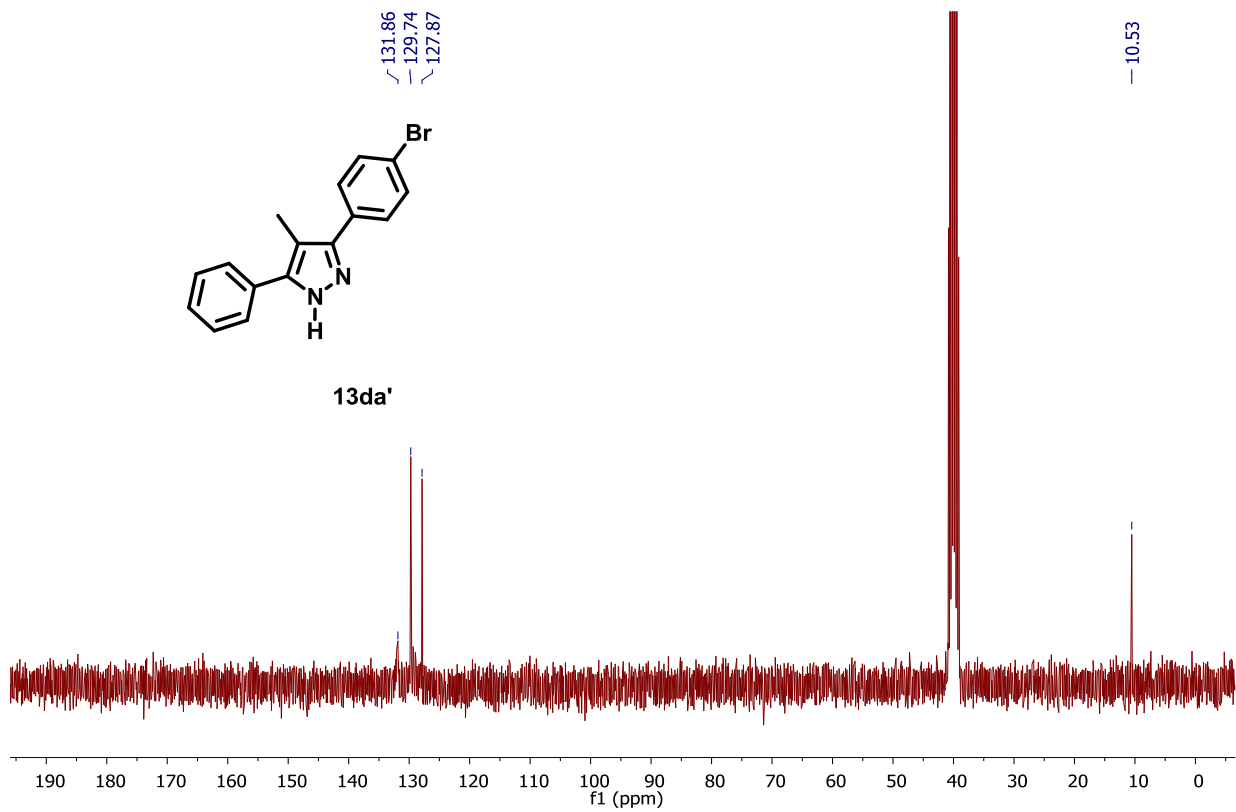

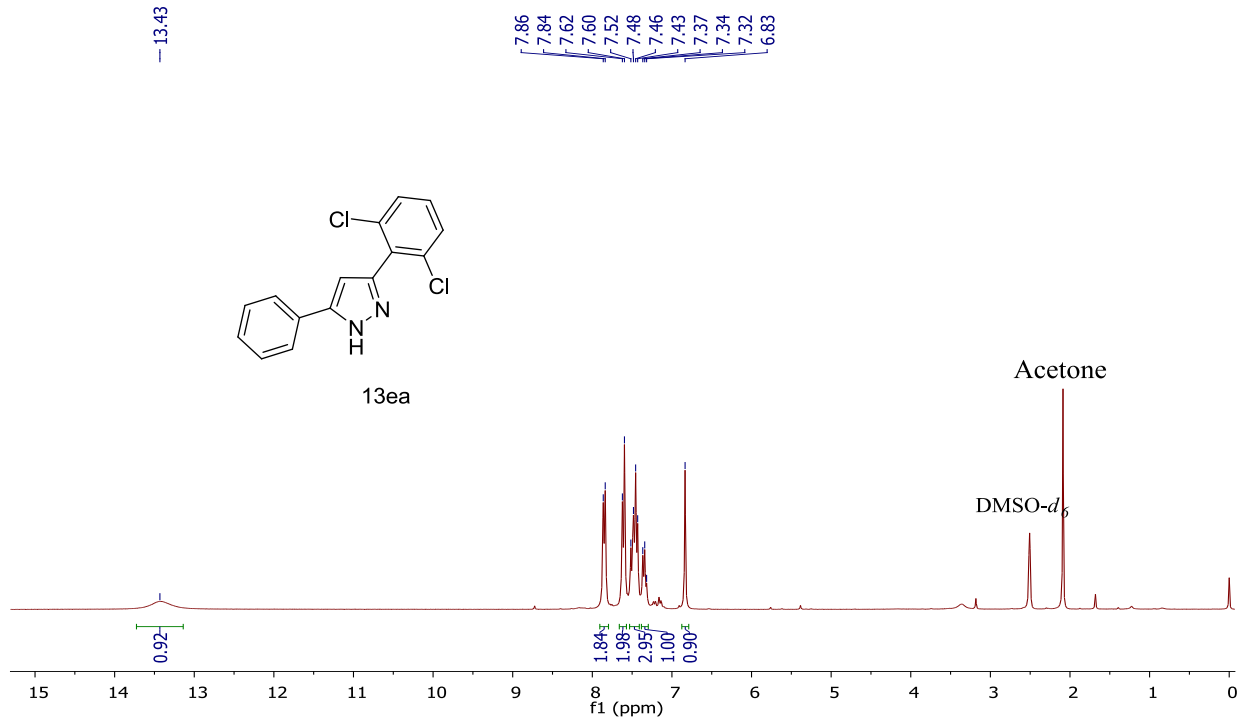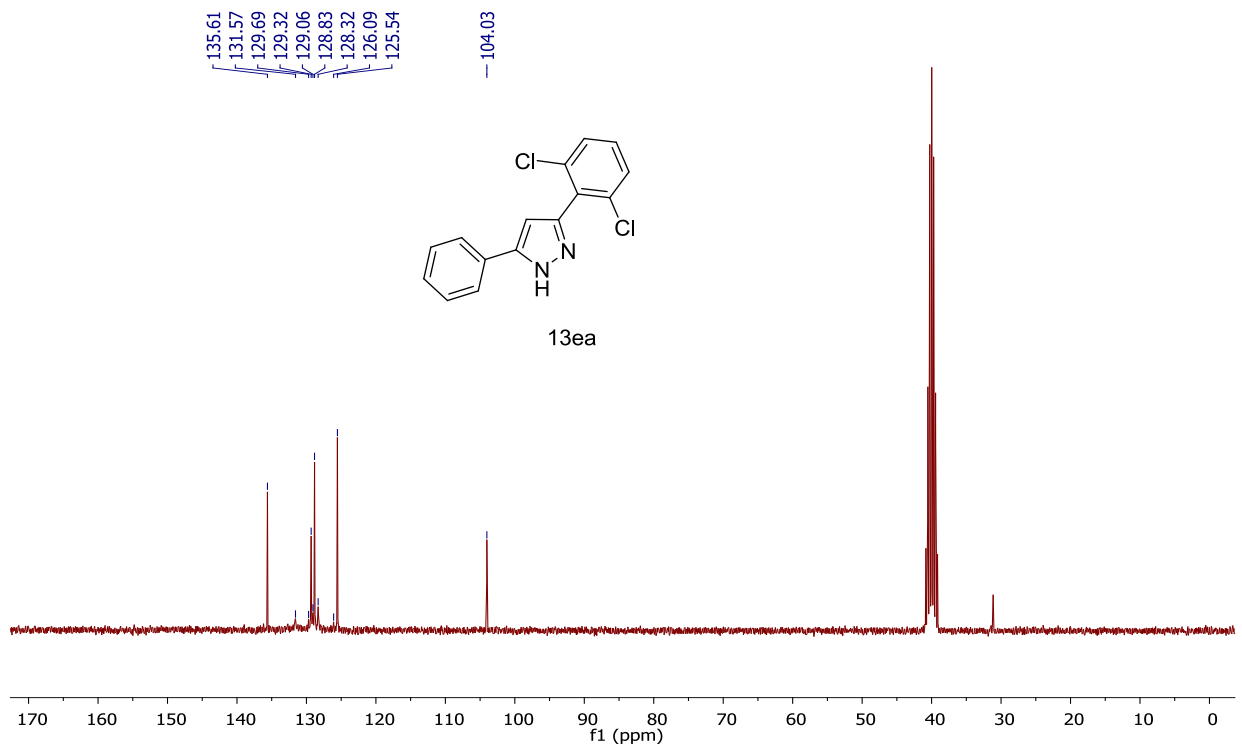

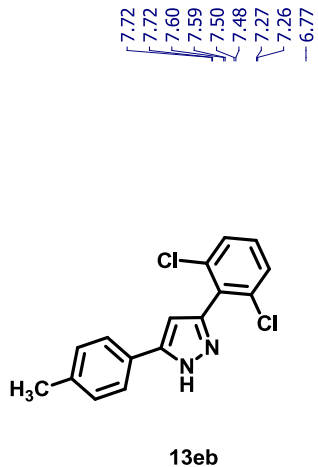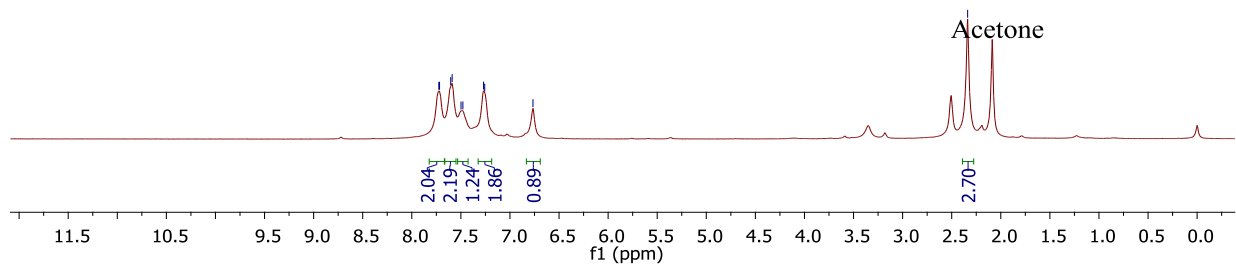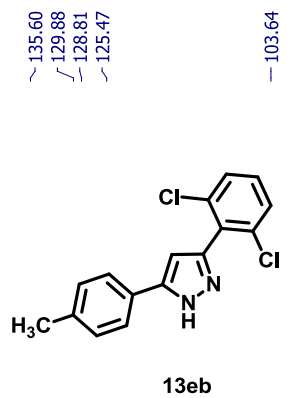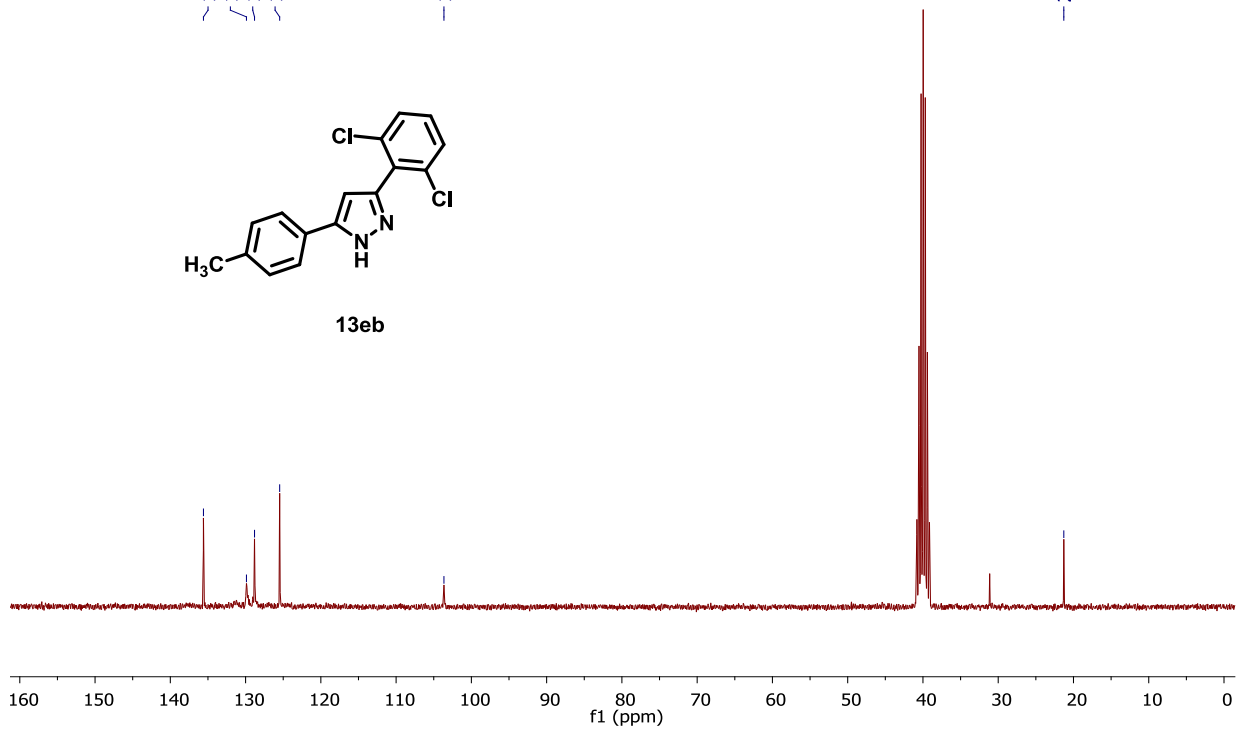

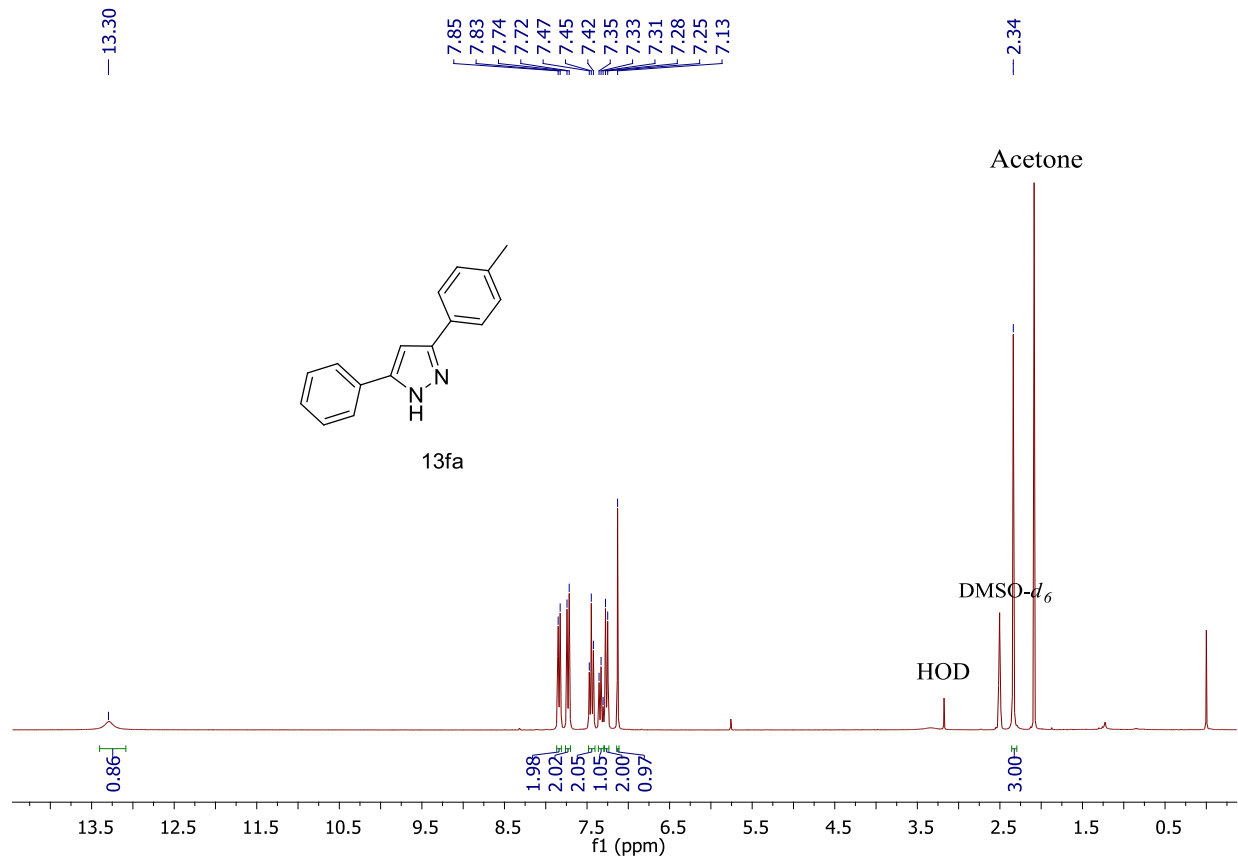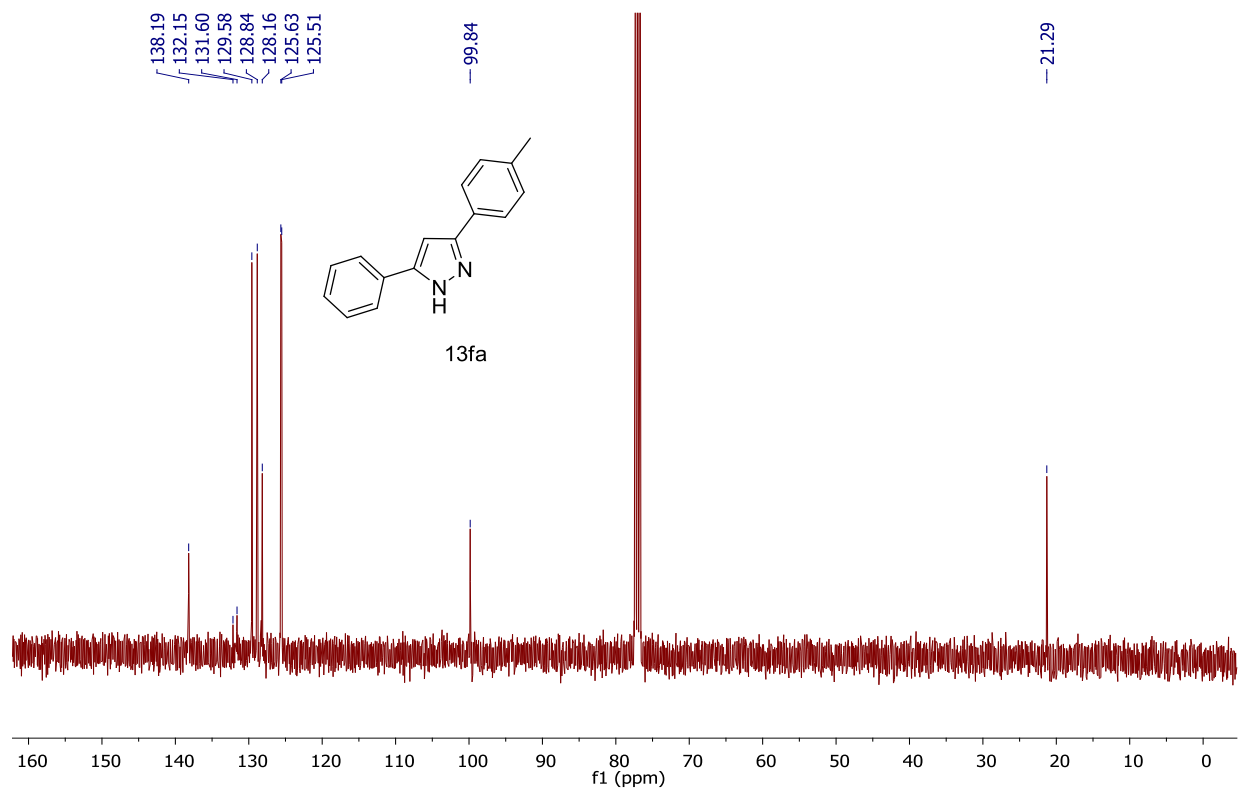

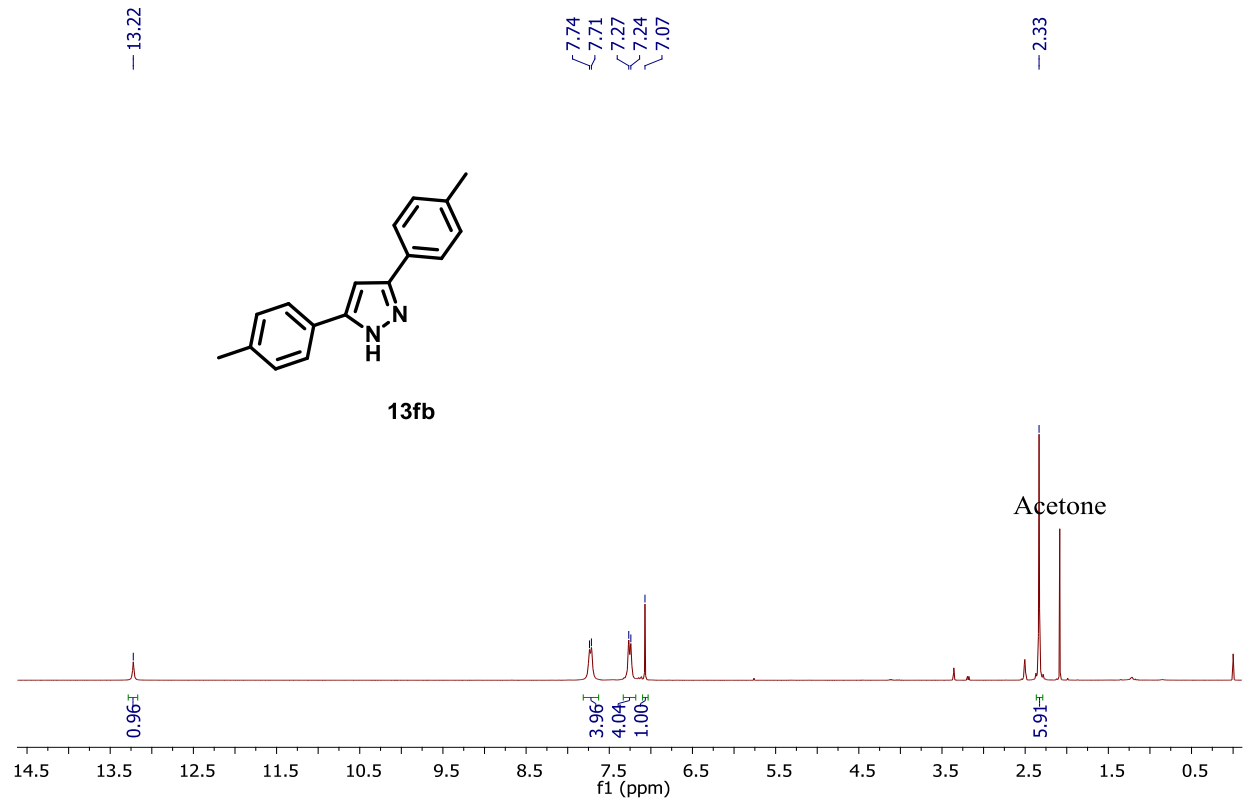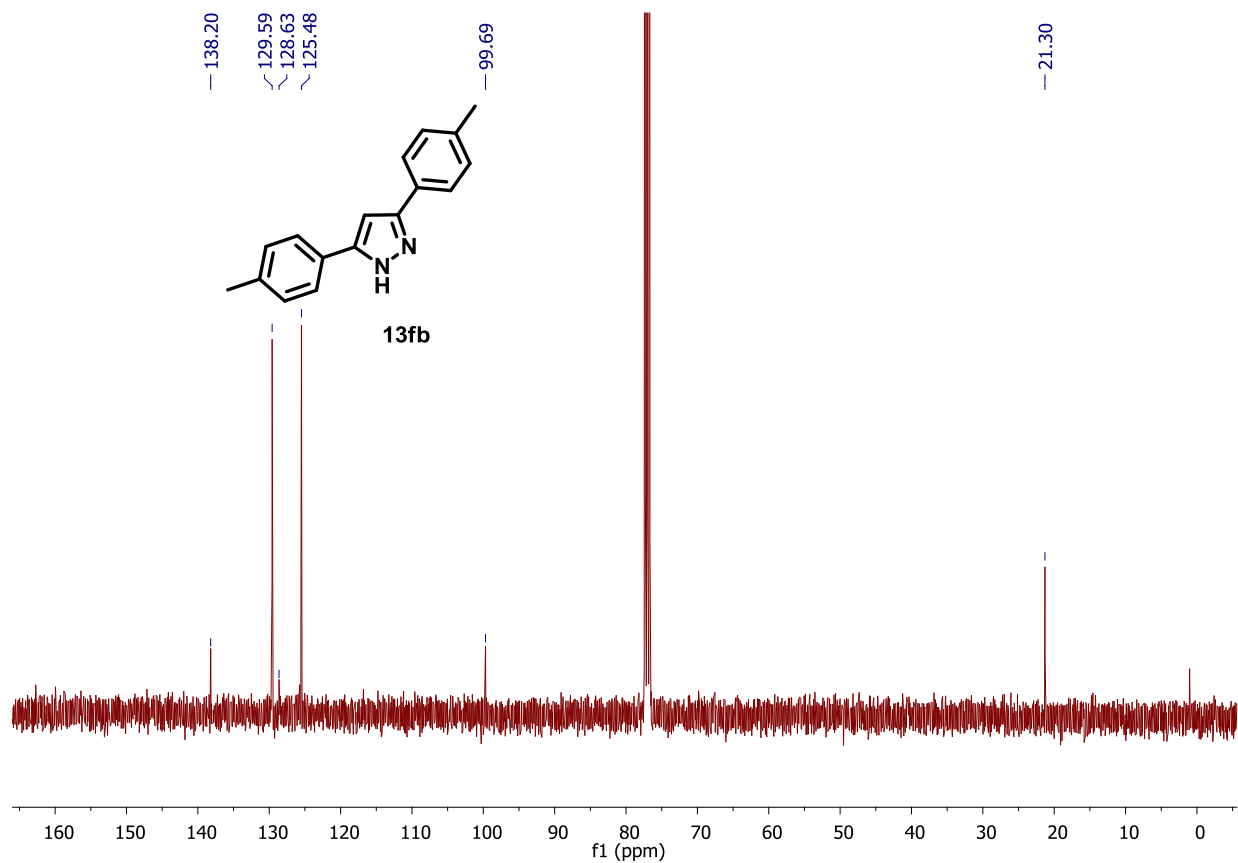

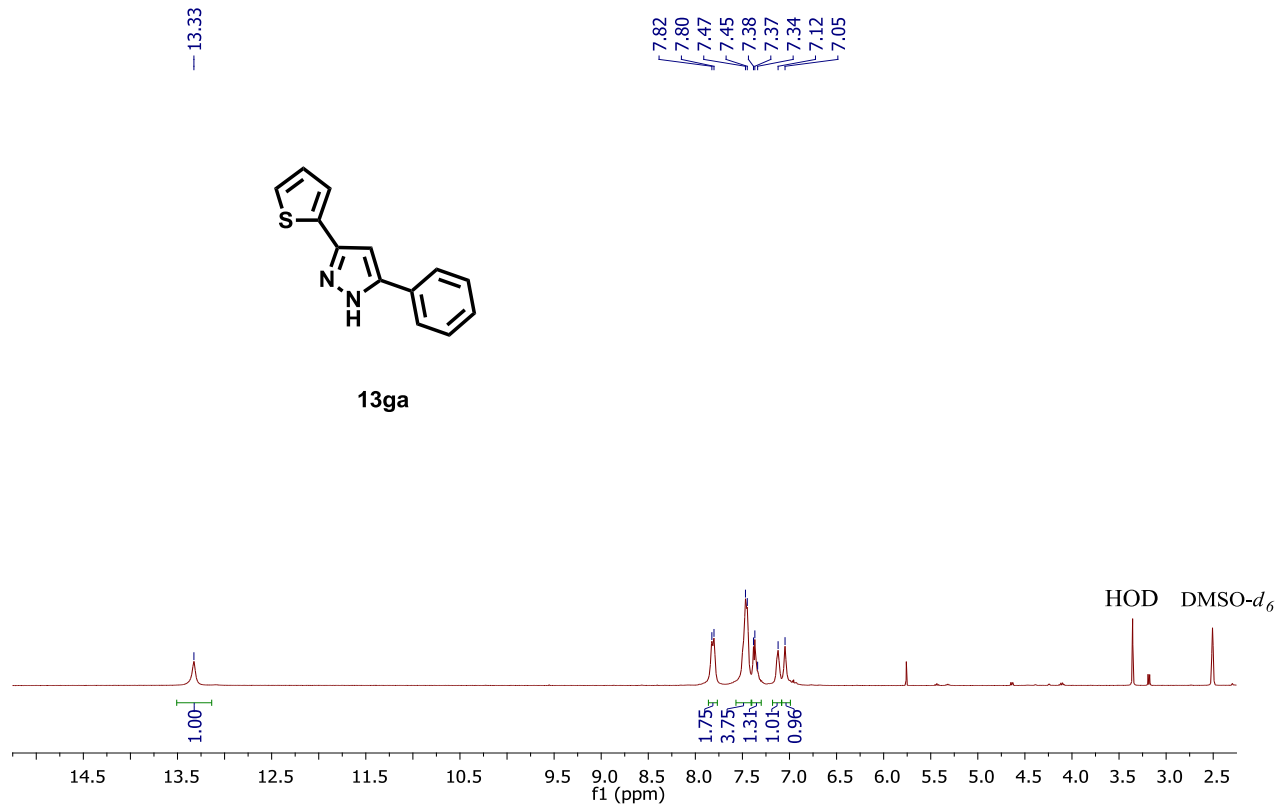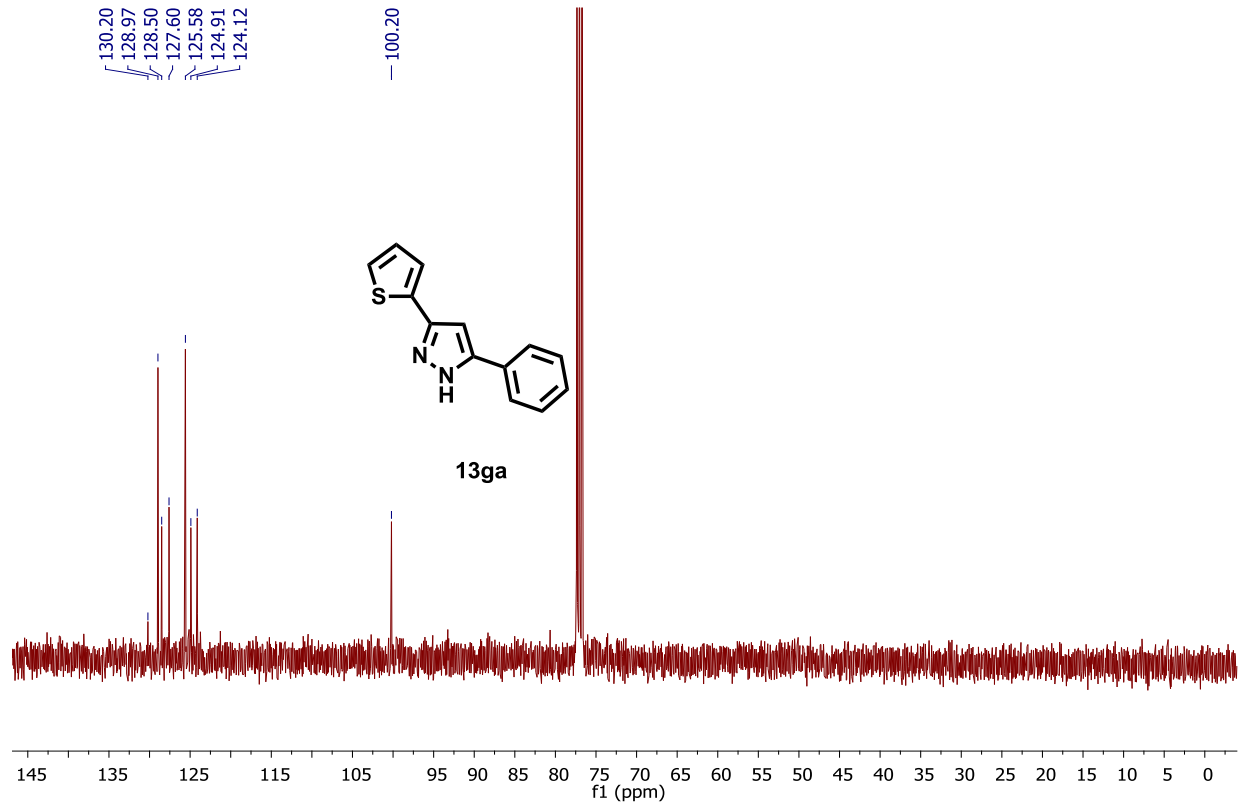

Supplement: c4qo00092g1.pdf [file c4qo00092g1.pdf]
